# Supplementary material
Source: MDPI journal article supplement (https://www.mdpi.com/2073-4395/11/3/486)
Supplement: s1 [file s1]

**Manuscript title:**

Does Leaf Waxiness Confound the Use of NDVI in the Assessment of Chlorophyll When Evaluating Genetic Diversity Panels of Wheat?

**Journal:**

Agronomy (MDPI)

**Authors:**

Kamal Khadka<sup>1,\*</sup>, Andrew J. Burt<sup>2</sup>, Hugh J. Earl<sup>1</sup>, Manish N. Raizada<sup>1</sup>, Alireza Navabi<sup>1</sup>

**Affiliation:**

<sup>\*1</sup> Department of Plant Agriculture, University of Guelph, Guelph, Ontario, Canada, N1G 2W1

**Corresponding author email address:**

[kamal.khadka011@gmail.com](mailto:kamal.khadka011@gmail.com)

**Supplementary Material Table S5:** Detailed time course NDVI data from 2016 and 2017, Elora, Canada

| Year | Country | Location | Plot | Entry | Block | iblk | NDVI1 | NDVI2 | NDVI3 | NDVI4 | NDVI5 | NDVIDr | Grain Yield (kg/ha) |
|------|---------|----------|------|-------|-------|------|-------|-------|-------|-------|-------|--------|---------------------|
| 2016 | Canada  | Elora    | 1    | 27    | 1     | 1    | 0.78  | 0.74  | 0.68  | 0.68  | 0.66  |        | 1783.48             |
| 2016 | Canada  | Elora    | 2    | 198   | 1     | 1    | 0.7   | 0.7   | 0.68  | 0.65  | 0.42  |        | 3213.93             |
| 2016 | Canada  | Elora    | 3    | 110   | 1     | 1    | 0.74  | 0.74  | 0.65  | 0.65  | 0.56  |        | 1822.68             |
| 2016 | Canada  | Elora    | 4    | 187   | 1     | 1    | 0.73  | 0.7   | 0.65  | 0.66  | 0.49  |        | 2913.83             |
| 2016 | Canada  | Elora    | 5    | 148   | 1     | 1    | 0.75  | 0.73  | 0.64  | 0.63  | 0.49  |        | 1967.66             |
| 2016 | Canada  | Elora    | 6    | 155   | 1     | 1    | 0.72  | 0.71  | 0.62  | 0.62  | 0.52  |        | 2643.08             |
| 2016 | Canada  | Elora    | 7    | 217   | 1     | 1    | 0.74  | 0.71  | 0.63  | 0.6   | 0.52  |        | 2423.71             |
| 2016 | Canada  | Elora    | 8    | 295   | 1     | 1    | 0.7   | 0.63  | 0.58  | 0.57  | 0.48  |        | 2757.69             |
| 2016 | Canada  | Elora    | 9    | 308   | 1     | 1    | 0.7   | 0.67  | 0.62  | 0.67  | 0.56  |        | 2528.75             |
| 2016 | Canada  | Elora    | 10   | 3     | 1     | 1    | 0.74  | 0.73  | 0.67  | 0.68  | 0.51  |        | 2017.51             |
| 2016 | Canada  | Elora    | 11   | 179   | 1     | 1    | 0.72  | 0.69  | 0.62  | 0.66  | 0.51  |        | 2889.78             |
| 2016 | Canada  | Elora    | 12   | 193   | 1     | 1    | 0.73  | 0.72  | 0.67  | 0.71  | 0.52  |        | 3118.13             |
| 2016 | Canada  | Elora    | 13   | 171   | 1     | 1    | 0.72  | 0.67  | 0.61  | 0.6   | 0.54  |        | 2276.07             |
| 2016 | Canada  | Elora    | 14   | 42    | 1     | 1    | 0.71  | 0.68  | 0.62  | 0.65  | 0.51  |        | 1231.68             |
| 2016 | Canada  | Elora    | 15   | 285   | 1     | 1    | 0.74  | 0.71  | 0.6   | 0.68  | 0.62  |        | 2529.35             |
| 2016 | Canada  | Elora    | 16   | 134   | 1     | 1    | 0.78  | 0.78  | 0.6   | 0.66  | 0.57  |        | 2141.18             |
| 2016 | Canada  | Elora    | 17   | 289   | 1     | 1    | 0.75  | 0.73  | 0.65  | 0.67  | 0.47  |        | 3728.41             |
| 2016 | Canada  | Elora    | 18   | 67    | 1     | 1    | 0.76  | 0.71  | 0.64  | 0.66  | 0.65  |        | 3098.50             |

|      |        |       |    |     |   |   |      |      |      |      |      |         |
|------|--------|-------|----|-----|---|---|------|------|------|------|------|---------|
| 2016 | Canada | Elora | 19 | 317 | 1 | 1 | 0.71 | 0.66 | 0.65 | 0.64 | 0.44 | 2334.02 |
| 2016 | Canada | Elora | 20 | 96  | 1 | 1 | 0.69 | 0.69 | 0.67 | 0.67 | 0.6  | 2886.67 |
| 2016 | Canada | Elora | 21 | 216 | 1 | 1 | 0.68 | 0.65 | 0.62 | 0.6  | 0.48 | 3711.90 |
| 2016 | Canada | Elora | 22 | 287 | 1 | 1 | 0.71 | 0.69 | 0.65 | 0.65 | 0.53 | 3229.66 |
| 2016 | Canada | Elora | 23 | 69  | 1 | 1 | 0.72 | 0.71 | 0.67 | 0.65 | 0.51 | 2231.84 |
| 2016 | Canada | Elora | 24 | 210 | 1 | 1 | 0.74 | 0.72 | 0.66 | 0.65 | 0.58 | 2316.26 |
| 2016 | Canada | Elora | 25 | 168 | 1 | 1 | 0.69 | 0.68 | 0.63 | 0.6  | 0.41 | 3248.97 |
| 2016 | Canada | Elora | 26 | 311 | 1 | 1 | 0.7  | 0.7  | 0.64 | 0.7  | 0.62 | 3172.96 |
| 2016 | Canada | Elora | 27 | 141 | 1 | 1 | 0.74 | 0.69 | 0.61 | 0.67 | 0.59 | 3391.34 |
| 2016 | Canada | Elora | 28 | 7   | 1 | 1 | 0.71 | 0.71 | 0.64 | 0.65 | 0.5  | 1757.69 |
| 2016 | Canada | Elora | 29 | 314 | 1 | 1 | 0.7  | 0.68 | 0.59 | 0.55 | 0.47 | 3539.31 |
| 2016 | Canada | Elora | 30 | 239 | 1 | 1 | 0.7  | 0.67 | 0.57 | 0.54 | 0.51 | 3841.18 |
| 2016 | Canada | Elora | 31 | 51  | 1 | 1 | 0.69 | 0.68 | 0.61 | 0.65 | 0.38 | 3355.20 |
| 2016 | Canada | Elora | 32 | 207 | 1 | 1 | 0.73 | 0.69 | 0.64 | 0.65 | 0.68 | 3193.83 |
| 2016 | Canada | Elora | 33 | 316 | 1 | 2 | 0.72 | 0.71 | 0.64 | 0.64 | 0.54 | 2893.43 |
| 2016 | Canada | Elora | 34 | 175 | 1 | 2 | 0.74 | 0.72 | 0.65 | 0.59 | 0.47 | 3967.85 |
| 2016 | Canada | Elora | 35 | 140 | 1 | 2 | 0.68 | 0.66 | 0.62 | 0.55 | 0.53 | 2337.26 |
| 2016 | Canada | Elora | 36 | 290 | 1 | 2 | 0.71 | 0.68 | 0.62 | 0.62 | 0.56 | 3487.35 |
| 2016 | Canada | Elora | 37 | 111 | 1 | 2 | 0.77 | 0.77 | 0.7  | 0.7  | 0.58 | 1914.27 |
| 2016 | Canada | Elora | 38 | 296 | 1 | 2 | 0.67 | 0.66 | 0.62 | 0.64 | 0.55 | 3255.20 |
| 2016 | Canada | Elora | 39 | 268 | 1 | 2 | 0.65 | 0.63 | 0.59 | 0.62 | 0.49 | 3380.31 |
| 2016 | Canada | Elora | 40 | 306 | 1 | 2 | 0.64 | 0.64 | 0.59 | 0.66 | 0.59 | 2730.28 |
| 2016 | Canada | Elora | 41 | 241 | 1 | 2 | 0.7  | 0.68 | 0.57 | 0.62 | 0.55 | 2326.57 |
| 2016 | Canada | Elora | 42 | 105 | 1 | 2 | 0.65 | 0.65 | 0.58 | 0.66 | 0.55 | 3024.45 |
| 2016 | Canada | Elora | 43 | 98  | 1 | 2 | 0.71 | 0.69 | 0.61 | 0.59 | 0.34 | 2195.39 |
| 2016 | Canada | Elora | 44 | 249 | 1 | 2 | 0.69 | 0.68 | 0.6  | 0.68 | 0.51 | 1928.41 |
| 2016 | Canada | Elora | 45 | 74  | 1 | 2 | 0.69 | 0.66 | 0.58 | 0.65 | 0.53 | 1170.78 |
| 2016 | Canada | Elora | 46 | 173 | 1 | 2 | 0.65 | 0.64 | 0.61 | 0.64 | 0.48 | 3019.38 |
| 2016 | Canada | Elora | 47 | 219 | 1 | 2 | 0.7  | 0.69 | 0.64 | 0.65 | 0.64 | 2433.40 |
| 2016 | Canada | Elora | 48 | 167 | 1 | 2 | 0.72 | 0.69 | 0.65 | 0.65 | 0.49 | 3098.29 |
| 2016 | Canada | Elora | 49 | 261 | 1 | 2 | 0.68 | 0.64 | 0.62 | 0.65 | 0.45 | 3421.87 |
| 2016 | Canada | Elora | 50 | 101 | 1 | 2 | 0.71 | 0.69 | 0.64 | 0.65 | 0.46 | 3533.71 |
| 2016 | Canada | Elora | 51 | 30  | 1 | 2 | 0.73 | 0.67 | 0.62 | 0.64 | 0.51 | 3286.36 |

|      |        |       |    |     |   |   |      |      |      |      |      |         |
|------|--------|-------|----|-----|---|---|------|------|------|------|------|---------|
| 2016 | Canada | Elora | 52 | 117 | 1 | 2 | 0.69 | 0.68 | 0.61 | 0.6  | 0.53 | 3612.12 |
| 2016 | Canada | Elora | 53 | 158 | 1 | 2 | 0.76 | 0.73 | 0.64 | 0.62 | 0.58 | 3253.02 |
| 2016 | Canada | Elora | 54 | 56  | 1 | 2 | 0.75 | 0.75 | 0.69 | 0.64 | 0.63 | 3186.67 |
| 2016 | Canada | Elora | 55 | 248 | 1 | 2 | 0.78 | 0.73 | 0.59 | 0.57 | 0.42 | 3329.66 |
| 2016 | Canada | Elora | 56 | 164 | 1 | 2 | 0.75 | 0.73 | 0.66 | 0.62 | 0.56 | 3217.20 |
| 2016 | Canada | Elora | 57 | 19  | 1 | 2 | 0.66 | 0.66 | 0.52 | 0.49 | 0.32 | 3929.35 |
| 2016 | Canada | Elora | 58 | 147 | 1 | 2 | 0.78 | 0.74 | 0.69 | 0.67 | 0.52 | 3729.03 |
| 2016 | Canada | Elora | 59 | 6   | 1 | 2 | 0.8  | 0.77 | 0.69 | 0.69 | 0.58 | 3554.27 |
| 2016 | Canada | Elora | 60 | 194 | 1 | 2 | 0.77 | 0.75 | 0.71 | 0.65 | 0.51 | 5431.50 |
| 2016 | Canada | Elora | 61 | 228 | 1 | 2 | 0.69 | 0.65 | 0.61 | 0.59 | 0.49 | 2977.17 |
| 2016 | Canada | Elora | 62 | 113 | 1 | 2 | 0.77 | 0.75 | 0.68 | 0.67 | 0.59 | 3067.35 |
| 2016 | Canada | Elora | 63 | 294 | 1 | 2 | 0.68 | 0.63 | 0.56 | 0.61 | 0.45 | 3428.72 |
| 2016 | Canada | Elora | 64 | 153 | 1 | 2 | 0.71 | 0.68 | 0.6  | 0.64 | 0.66 | 2841.50 |
| 2016 | Canada | Elora | 65 | 29  | 1 | 3 | 0.71 | 0.71 | 0.6  | 0.63 | 0.46 | 1740.82 |
| 2016 | Canada | Elora | 66 | 92  | 1 | 3 | 0.74 | 0.71 | 0.63 | 0.62 | 0.64 | 2011.90 |
| 2016 | Canada | Elora | 67 | 82  | 1 | 3 | 0.68 | 0.68 | 0.62 | 0.61 | 0.57 | 2343.68 |
| 2016 | Canada | Elora | 68 | 203 | 1 | 3 | 0.72 | 0.67 | 0.63 | 0.62 | 0.48 | 4099.81 |
| 2016 | Canada | Elora | 69 | 106 | 1 | 3 | 0.73 | 0.71 | 0.66 | 0.63 | 0.53 | 1855.92 |
| 2016 | Canada | Elora | 70 | 176 | 1 | 3 | 0.7  | 0.66 | 0.62 | 0.66 | 0.5  | 3224.45 |
| 2016 | Canada | Elora | 71 | 145 | 1 | 3 | 0.72 | 0.72 | 0.64 | 0.64 | 0.56 | 2671.56 |
| 2016 | Canada | Elora | 72 | 212 | 1 | 3 | 0.71 | 0.69 | 0.62 | 0.62 | 0.58 | 3827.13 |
| 2016 | Canada | Elora | 73 | 160 | 1 | 3 | 0.76 | 0.73 | 0.63 | 0.61 | 0.45 | 2241.34 |
| 2016 | Canada | Elora | 74 | 185 | 1 | 3 | 0.74 | 0.71 | 0.62 | 0.65 | 0.46 | 3009.10 |
| 2016 | Canada | Elora | 75 | 297 | 1 | 3 | 0.78 | 0.75 | 0.69 | 0.71 | 0.63 | 1922.49 |
| 2016 | Canada | Elora | 76 | 81  | 1 | 3 | 0.69 | 0.68 | 0.64 | 0.62 | 0.53 | 1887.91 |
| 2016 | Canada | Elora | 77 | 143 | 1 | 3 | 0.74 | 0.71 | 0.61 | 0.61 | 0.52 | 2337.45 |
| 2016 | Canada | Elora | 78 | 126 | 1 | 3 | 0.75 | 0.73 | 0.62 | 0.58 | 0.6  | 1768.91 |
| 2016 | Canada | Elora | 79 | 54  | 1 | 3 | 0.78 | 0.73 | 0.66 | 0.62 | 0.62 | 1767.98 |
| 2016 | Canada | Elora | 80 | 77  | 1 | 3 | 0.71 | 0.7  | 0.66 | 0.66 | 0.58 | 2480.78 |
| 2016 | Canada | Elora | 81 | 211 | 1 | 3 | 0.73 | 0.68 | 0.65 | 0.61 | 0.53 | 3723.43 |
| 2016 | Canada | Elora | 82 | 165 | 1 | 3 | 0.74 | 0.71 | 0.71 | 0.69 | 0.62 | 3067.20 |
| 2016 | Canada | Elora | 83 | 12  | 1 | 3 | 0.7  | 0.69 | 0.62 | 0.64 | 0.48 | 4295.08 |
| 2016 | Canada | Elora | 84 | 292 | 1 | 3 | 0.69 | 0.67 | 0.62 | 0.58 | 0.48 | 4219.07 |

|      |        |       |     |     |   |   |      |      |      |      |      |         |
|------|--------|-------|-----|-----|---|---|------|------|------|------|------|---------|
| 2016 | Canada | Elora | 85  | 276 | 1 | 3 | 0.8  | 0.72 | 0.66 | 0.6  | 0.51 | 5064.24 |
| 2016 | Canada | Elora | 86  | 309 | 1 | 3 | 0.75 | 0.72 | 0.64 | 0.61 | 0.53 | 4916.88 |
| 2016 | Canada | Elora | 87  | 64  | 1 | 3 | 0.66 | 0.66 | 0.54 | 0.49 | 0.4  | 2637.45 |
| 2016 | Canada | Elora | 88  | 86  | 1 | 3 | 0.74 | 0.75 | 0.66 | 0.63 | 0.57 | 3208.47 |
| 2016 | Canada | Elora | 89  | 163 | 1 | 3 | 0.78 | 0.74 | 0.68 | 0.67 | 0.53 | 3400.06 |
| 2016 | Canada | Elora | 90  | 43  | 1 | 3 | 0.68 | 0.65 | 0.62 | 0.6  | 0.55 | 4127.48 |
| 2016 | Canada | Elora | 91  | 169 | 1 | 3 | 0.69 | 0.64 | 0.59 | 0.58 | 0.39 | 3128.72 |
| 2016 | Canada | Elora | 92  | 107 | 1 | 3 | 0.7  | 0.65 | 0.54 | 0.55 | 0.4  | 3232.77 |
| 2016 | Canada | Elora | 93  | 313 | 1 | 3 | 0.7  | 0.68 | 0.54 | 0.42 | 0.3  | 3156.14 |
| 2016 | Canada | Elora | 94  | 136 | 1 | 3 | 0.73 | 0.73 | 0.68 | 0.65 | 0.5  | 2719.07 |
| 2016 | Canada | Elora | 95  | 76  | 1 | 3 | 0.67 | 0.63 | 0.59 | 0.68 | 0.62 | 2150.84 |
| 2016 | Canada | Elora | 96  | 78  | 1 | 3 | 0.65 | 0.61 | 0.6  | 0.68 | 0.63 | 2409.10 |
| 2016 | Canada | Elora | 97  | 9   | 1 | 4 | 0.79 | 0.78 | 0.7  | 0.67 | 0.63 | 2802.65 |
| 2016 | Canada | Elora | 98  | 318 | 1 | 4 | 0.81 | 0.75 | 0.7  | 0.66 | 0.56 | 5040.03 |
| 2016 | Canada | Elora | 99  | 83  | 1 | 4 | 0.71 | 0.66 | 0.6  | 0.57 | 0.4  | 1889.56 |
| 2016 | Canada | Elora | 100 | 283 | 1 | 4 | 0.73 | 0.7  | 0.59 | 0.58 | 0.47 | 3425.92 |
| 2016 | Canada | Elora | 101 | 5   | 1 | 4 | 0.68 | 0.68 | 0.57 | 0.62 | 0.51 | 2526.54 |
| 2016 | Canada | Elora | 102 | 152 | 1 | 4 | 0.7  | 0.66 | 0.57 | 0.59 | 0.52 | 2542.68 |
| 2016 | Canada | Elora | 103 | 60  | 1 | 4 | 0.74 | 0.7  | 0.65 | 0.63 | 0.59 | 3135.17 |
| 2016 | Canada | Elora | 104 | 301 | 1 | 4 | 0.73 | 0.69 | 0.6  | 0.64 | 0.51 | 3345.23 |
| 2016 | Canada | Elora | 105 | 46  | 1 | 4 | 0.78 | 0.69 | 0.65 | 0.65 | 0.48 | 3021.56 |
| 2016 | Canada | Elora | 106 | 310 | 1 | 4 | 0.69 | 0.67 | 0.65 | 0.64 | 0.61 | 3508.79 |
| 2016 | Canada | Elora | 107 | 70  | 1 | 4 | 0.72 | 0.67 | 0.66 | 0.67 | 0.6  | 3069.22 |
| 2016 | Canada | Elora | 108 | 10  | 1 | 4 | 0.74 | 0.7  | 0.63 | 0.62 | 0.55 | 2089.16 |
| 2016 | Canada | Elora | 109 | 115 | 1 | 4 | 0.7  | 0.72 | 0.67 | 0.65 | 0.55 | 1787.91 |
| 2016 | Canada | Elora | 110 | 271 | 1 | 4 | 0.72 | 0.68 | 0.61 | 0.59 | 0.47 | 3360.19 |
| 2016 | Canada | Elora | 111 | 284 | 1 | 4 | 0.69 | 0.65 | 0.6  | 0.57 | 0.45 | 2962.37 |
| 2016 | Canada | Elora | 112 | 240 | 1 | 4 | 0.69 | 0.67 | 0.62 | 0.57 | 0.52 | 3183.40 |
| 2016 | Canada | Elora | 113 | 36  | 1 | 4 | 0.73 | 0.72 | 0.65 | 0.65 | 0.62 | 2512.83 |
| 2016 | Canada | Elora | 114 | 91  | 1 | 4 | 0.71 | 0.65 | 0.7  | 0.61 | 0.5  | 3913.46 |
| 2016 | Canada | Elora | 115 | 58  | 1 | 4 | 0.74 | 0.71 | 0.67 | 0.66 | 0.6  | 3654.39 |
| 2016 | Canada | Elora | 116 | 63  | 1 | 4 | 0.75 | 0.73 | 0.63 | 0.62 | 0.58 | 3442.43 |
| 2016 | Canada | Elora | 117 | 114 | 1 | 4 | 0.73 | 0.71 | 0.63 | 0.58 | 0.36 | 4553.33 |

|      |        |       |     |     |   |   |      |      |      |      |      |         |
|------|--------|-------|-----|-----|---|---|------|------|------|------|------|---------|
| 2016 | Canada | Elora | 118 | 174 | 1 | 4 | 0.68 | 0.69 | 0.64 | 0.61 | 0.47 | 4861.12 |
| 2016 | Canada | Elora | 119 | 14  | 1 | 4 | 0.81 | 0.8  | 0.79 | 0.58 | 0.68 | 2109.72 |
| 2016 | Canada | Elora | 120 | 2   | 1 | 4 | 0.8  | 0.79 | 0.71 | 0.59 | 0.66 | 2891.96 |
| 2016 | Canada | Elora | 121 | 302 | 1 | 4 | 0.7  | 0.71 | 0.6  | 0.58 | 0.44 | 4517.20 |
| 2016 | Canada | Elora | 122 | 205 | 1 | 4 | 0.73 | 0.71 | 0.63 | 0.62 | 0.57 | 4399.75 |
| 2016 | Canada | Elora | 123 | 269 | 1 | 4 | 0.7  | 0.66 | 0.61 | 0.65 | 0.42 | 3795.30 |
| 2016 | Canada | Elora | 124 | 220 | 1 | 4 | 0.68 | 0.64 | 0.59 | 0.57 | 0.5  | 4115.64 |
| 2016 | Canada | Elora | 125 | 300 | 1 | 4 | 0.71 | 0.68 | 0.62 | 0.53 | 0.43 | 4529.03 |
| 2016 | Canada | Elora | 126 | 130 | 1 | 4 | 0.71 | 0.71 | 0.65 | 0.59 | 0.5  | 2290.72 |
| 2016 | Canada | Elora | 127 | 118 | 1 | 4 | 0.68 | 0.65 | 0.6  | 0.67 | 0.61 | 2368.91 |
| 2016 | Canada | Elora | 128 | 62  | 1 | 4 | 0.69 | 0.62 | 0.59 | 0.61 | 0.57 | 1865.17 |
| 2016 | Canada | Elora | 129 | 202 | 1 | 5 | 0.75 | 0.75 | 0.59 | 0.64 | 0.52 | 3400.86 |
| 2016 | Canada | Elora | 130 | 35  | 1 | 5 | 0.7  | 0.65 | 0.53 | 0.55 | 0.45 | 4286.51 |
| 2016 | Canada | Elora | 131 | 206 | 1 | 5 | 0.75 | 0.66 | 0.56 | 0.56 | 0.34 | 2875.02 |
| 2016 | Canada | Elora | 132 | 21  | 1 | 5 | 0.67 | 0.66 | 0.52 | 0.55 | 0.49 | 2482.52 |
| 2016 | Canada | Elora | 133 | 260 | 1 | 5 | 0.72 | 0.65 | 0.61 | 0.62 | 0.53 | 2997.88 |
| 2016 | Canada | Elora | 134 | 243 | 1 | 5 | 0.75 | 0.68 | 0.67 | 0.67 | 0.6  | 2000.03 |
| 2016 | Canada | Elora | 135 | 226 | 1 | 5 | 0.74 | 0.71 | 0.67 | 0.63 | 0.49 | 4180.59 |
| 2016 | Canada | Elora | 136 | 146 | 1 | 5 | 0.77 | 0.72 | 0.69 | 0.67 | 0.6  | 3068.57 |
| 2016 | Canada | Elora | 137 | 37  | 1 | 5 | 0.78 | 0.76 | 0.7  | 0.68 | 0.65 | 2195.39 |
| 2016 | Canada | Elora | 138 | 90  | 1 | 5 | 0.78 | 0.73 | 0.66 | 0.66 | 0.66 | 2686.67 |
| 2016 | Canada | Elora | 139 | 16  | 1 | 5 | 0.83 | 0.78 | 0.7  | 0.7  | 0.67 | 1530.90 |
| 2016 | Canada | Elora | 140 | 232 | 1 | 5 | 0.72 | 0.67 | 0.62 | 0.61 | 0.52 | 3796.07 |
| 2016 | Canada | Elora | 141 | 222 | 1 | 5 | 0.79 | 0.73 | 0.6  | 0.59 | 0.53 | 3300.28 |
| 2016 | Canada | Elora | 142 | 258 | 1 | 5 | 0.72 | 0.64 | 0.59 | 0.52 | 0.38 | 3546.48 |
| 2016 | Canada | Elora | 143 | 72  | 1 | 5 | 0.74 | 0.69 | 0.6  | 0.59 | 0.46 | 2220.00 |
| 2016 | Canada | Elora | 144 | 199 | 1 | 5 | 0.6  | 0.62 | 0.56 | 0.56 | 0.41 | 3171.21 |
| 2016 | Canada | Elora | 145 | 281 | 1 | 5 | 0.74 | 0.7  | 0.66 | 0.67 | 0.57 | 3903.02 |
| 2016 | Canada | Elora | 146 | 50  | 1 | 5 | 0.75 | 0.69 | 0.63 | 0.59 | 0.49 | 3610.97 |
| 2016 | Canada | Elora | 147 | 108 | 1 | 5 | 0.7  | 0.74 | 0.66 | 0.6  | 0.55 | 2855.51 |
| 2016 | Canada | Elora | 148 | 192 | 1 | 5 | 0.74 | 0.67 | 0.59 | 0.54 | 0.41 | 4364.55 |
| 2016 | Canada | Elora | 149 | 225 | 1 | 5 | 0.71 | 0.68 | 0.58 | 0.55 | 0.47 | 4577.63 |
| 2016 | Canada | Elora | 150 | 242 | 1 | 5 | 0.72 | 0.67 | 0.62 | 0.51 | 0.49 | 4366.42 |

|      |        |       |     |     |   |   |      |      |      |      |      |         |
|------|--------|-------|-----|-----|---|---|------|------|------|------|------|---------|
| 2016 | Canada | Elora | 151 | 100 | 1 | 5 | 0.75 | 0.72 | 0.7  | 0.59 | 0.42 | 4304.42 |
| 2016 | Canada | Elora | 152 | 255 | 1 | 5 | 0.69 | 0.69 | 0.66 | 0.6  | 0.41 | 5085.42 |
| 2016 | Canada | Elora | 153 | 138 | 1 | 5 | 0.77 | 0.73 | 0.62 | 0.63 | 0.48 | 4117.82 |
| 2016 | Canada | Elora | 154 | 245 | 1 | 5 | 0.74 | 0.69 | 0.64 | 0.65 | 0.56 | 4088.22 |
| 2016 | Canada | Elora | 155 | 11  | 1 | 5 | 0.68 | 0.59 | 0.55 | 0.55 | 0.38 | 3543.05 |
| 2016 | Canada | Elora | 156 | 178 | 1 | 5 | 0.66 | 0.64 | 0.58 | 0.56 | 0.45 | 3432.15 |
| 2016 | Canada | Elora | 157 | 151 | 1 | 5 | 0.78 | 0.73 | 0.68 | 0.66 | 0.43 | 2796.32 |
| 2016 | Canada | Elora | 158 | 31  | 1 | 5 | 0.8  | 0.76 | 0.71 | 0.67 | 0.67 | 3315.95 |
| 2016 | Canada | Elora | 159 | 79  | 1 | 5 | 0.64 | 0.65 | 0.51 | 0.61 | 0.48 | 2630.28 |
| 2016 | Canada | Elora | 160 | 286 | 1 | 5 | 0.62 | 0.57 | 0.53 | 0.62 | 0.56 | 2373.89 |
| 2016 | Canada | Elora | 161 | 120 | 1 | 6 | 0.73 | 0.7  | 0.59 | 0.51 | 0.46 | 3193.70 |
| 2016 | Canada | Elora | 162 | 250 | 1 | 6 | 0.75 | 0.73 | 0.65 | 0.59 | 0.55 | 4027.38 |
| 2016 | Canada | Elora | 163 | 93  | 1 | 6 | 0.76 | 0.73 | 0.69 | 0.66 | 0.48 | 4266.42 |
| 2016 | Canada | Elora | 164 | 137 | 1 | 6 | 0.78 | 0.73 | 0.65 | 0.64 | 0.57 | 1976.98 |
| 2016 | Canada | Elora | 165 | 274 | 1 | 6 | 0.71 | 0.78 | 0.64 | 0.67 | 0.6  | 2618.44 |
| 2016 | Canada | Elora | 166 | 214 | 1 | 6 | 0.7  | 0.66 | 0.59 | 0.66 | 0.61 | 4304.52 |
| 2016 | Canada | Elora | 167 | 315 | 1 | 6 | 0.76 | 0.7  | 0.66 | 0.62 | 0.5  | 3837.45 |
| 2016 | Canada | Elora | 168 | 263 | 1 | 6 | 0.71 | 0.68 | 0.63 | 0.68 | 0.48 | 3550.72 |
| 2016 | Canada | Elora | 169 | 262 | 1 | 6 | 0.76 | 0.72 | 0.7  | 0.7  | 0.7  | 2675.92 |
| 2016 | Canada | Elora | 170 | 1   | 1 | 6 | 0.79 | 0.73 | 0.68 | 0.67 | 0.62 | 2240.56 |
| 2016 | Canada | Elora | 171 | 88  | 1 | 6 | 0.77 | 0.73 | 0.65 | 0.61 | 0.68 | 2995.39 |
| 2016 | Canada | Elora | 172 | 103 | 1 | 6 | 0.8  | 0.79 | 0.71 | 0.69 | 0.65 | 1393.46 |
| 2016 | Canada | Elora | 173 | 144 | 1 | 6 | 0.72 | 0.7  | 0.63 | 0.56 | 0.64 | 3393.96 |
| 2016 | Canada | Elora | 174 | 87  | 1 | 6 | 0.75 | 0.72 | 0.66 | 0.65 | 0.61 | 2040.75 |
| 2016 | Canada | Elora | 175 | 129 | 1 | 6 | 0.75 | 0.73 | 0.65 | 0.59 | 0.6  | 2323.74 |
| 2016 | Canada | Elora | 176 | 303 | 1 | 6 | 0.77 | 0.69 | 0.62 | 0.58 | 0.45 | 3716.26 |
| 2016 | Canada | Elora | 177 | 132 | 1 | 6 | 0.72 | 0.65 | 0.62 | 0.6  | 0.6  | 1494.14 |
| 2016 | Canada | Elora | 178 | 109 | 1 | 6 | 0.77 | 0.72 | 0.67 | 0.63 | 0.61 | 2825.30 |
| 2016 | Canada | Elora | 179 | 244 | 1 | 6 | 0.78 | 0.71 | 0.67 | 0.61 | 0.49 | 4417.20 |
| 2016 | Canada | Elora | 180 | 45  | 1 | 6 | 0.72 | 0.64 | 0.6  | 0.53 | 0.54 | 2477.63 |
| 2016 | Canada | Elora | 181 | 264 | 1 | 6 | 0.7  | 0.67 | 0.63 | 0.6  | 0.48 | 5317.20 |
| 2016 | Canada | Elora | 182 | 157 | 1 | 6 | 0.76 | 0.73 | 0.67 | 0.63 | 0.48 | 3961.74 |
| 2016 | Canada | Elora | 183 | 184 | 1 | 6 | 0.73 | 0.66 | 0.55 | 0.47 | 0.31 | 3964.55 |

|      |        |       |     |     |   |   |      |      |      |      |      |         |
|------|--------|-------|-----|-----|---|---|------|------|------|------|------|---------|
| 2016 | Canada | Elora | 184 | 247 | 1 | 6 | 0.67 | 0.67 | 0.59 | 0.53 | 0.54 | 4653.02 |
| 2016 | Canada | Elora | 185 | 8   | 1 | 6 | 0.76 | 0.66 | 0.62 | 0.6  | 0.48 | 4004.11 |
| 2016 | Canada | Elora | 186 | 209 | 1 | 6 | 0.66 | 0.64 | 0.6  | 0.66 | 0.69 | 3558.01 |
| 2016 | Canada | Elora | 187 | 253 | 1 | 6 | 0.74 | 0.72 | 0.64 | 0.67 | 0.64 | 3567.98 |
| 2016 | Canada | Elora | 188 | 59  | 1 | 6 | 0.73 | 0.7  | 0.66 | 0.66 | 0.58 | 3640.34 |
| 2016 | Canada | Elora | 189 | 186 | 1 | 6 | 0.69 | 0.63 | 0.55 | 0.49 | 0.39 | 3522.18 |
| 2016 | Canada | Elora | 190 | 319 | 1 | 6 | 0.76 | 0.7  | 0.65 | 0.64 | 0.49 | 4883.24 |
| 2016 | Canada | Elora | 191 | 149 | 1 | 6 | 0.66 | 0.57 | 0.56 | 0.6  | 0.45 | 2017.51 |
| 2016 | Canada | Elora | 192 | 127 | 1 | 6 | 0.65 | 0.68 | 0.66 | 0.63 | 0.6  | 1094.14 |
| 2016 | Canada | Elora | 193 | 25  | 1 | 7 | 0.75 | 0.72 | 0.61 | 0.63 | 0.6  | 3415.74 |
| 2016 | Canada | Elora | 194 | 230 | 1 | 7 | 0.74 | 0.69 | 0.71 | 0.64 | 0.58 | 4585.76 |
| 2016 | Canada | Elora | 195 | 224 | 1 | 7 | 0.74 | 0.67 | 0.67 | 0.6  | 0.49 | 4059.72 |
| 2016 | Canada | Elora | 196 | 57  | 1 | 7 | 0.77 | 0.7  | 0.66 | 0.62 | 0.58 | 1867.85 |
| 2016 | Canada | Elora | 197 | 233 | 1 | 7 | 0.75 | 0.72 | 0.65 | 0.65 | 0.58 | 3061.65 |
| 2016 | Canada | Elora | 198 | 293 | 1 | 7 | 0.72 | 0.66 | 0.64 | 0.62 | 0.6  | 3532.62 |
| 2016 | Canada | Elora | 199 | 119 | 1 | 7 | 0.77 | 0.74 | 0.64 | 0.67 | 0.58 | 3061.12 |
| 2016 | Canada | Elora | 200 | 272 | 1 | 7 | 0.7  | 0.62 | 0.59 | 0.65 | 0.52 | 2906.57 |
| 2016 | Canada | Elora | 201 | 116 | 1 | 7 | 0.83 | 0.78 | 0.83 | 0.66 | 0.65 | 2627.94 |
| 2016 | Canada | Elora | 202 | 34  | 1 | 7 | 0.78 | 0.71 | 0.62 | 0.66 | 0.58 | 2849.13 |
| 2016 | Canada | Elora | 203 | 15  | 1 | 7 | 0.81 | 0.79 | 0.69 | 0.59 | 0.68 | 2414.39 |
| 2016 | Canada | Elora | 204 | 13  | 1 | 7 | 0.64 | 0.62 | 0.51 | 0.56 | 0.47 | 3502.24 |
| 2016 | Canada | Elora | 205 | 89  | 1 | 7 | 0.8  | 0.72 | 0.66 | 0.62 | 0.69 | 2539.00 |
| 2016 | Canada | Elora | 206 | 49  | 1 | 7 | 0.73 | 0.67 | 0.59 | 0.57 | 0.47 | 3375.76 |
| 2016 | Canada | Elora | 207 | 246 | 1 | 7 | 0.73 | 0.71 | 0.67 | 0.62 | 0.49 | 4581.65 |
| 2016 | Canada | Elora | 208 | 266 | 1 | 7 | 0.72 | 0.69 | 0.65 | 0.61 | 0.54 | 4215.95 |
| 2016 | Canada | Elora | 209 | 200 | 1 | 7 | 0.72 | 0.68 | 0.68 | 0.66 | 0.6  | 3765.79 |
| 2016 | Canada | Elora | 210 | 85  | 1 | 7 | 0.75 | 0.73 | 0.67 | 0.66 | 0.63 | 3741.37 |
| 2016 | Canada | Elora | 211 | 312 | 1 | 7 | 0.72 | 0.71 | 0.64 | 0.62 | 0.52 | 5544.30 |
| 2016 | Canada | Elora | 212 | 227 | 1 | 7 | 0.74 | 0.68 | 0.63 | 0.65 | 0.58 | 4095.39 |
| 2016 | Canada | Elora | 213 | 195 | 1 | 7 | 0.77 | 0.68 | 0.62 | 0.6  | 0.45 | 4668.29 |
| 2016 | Canada | Elora | 214 | 182 | 1 | 7 | 0.73 | 0.68 | 0.64 | 0.6  | 0.49 | 4502.24 |
| 2016 | Canada | Elora | 215 | 28  | 1 | 7 | 0.74 | 0.69 | 0.59 | 0.5  | 0.4  | 4212.83 |
| 2016 | Canada | Elora | 216 | 53  | 1 | 7 | 0.8  | 0.76 | 0.71 | 0.68 | 0.66 | 3464.24 |

|      |        |       |     |     |   |   |      |      |      |      |      |         |
|------|--------|-------|-----|-----|---|---|------|------|------|------|------|---------|
| 2016 | Canada | Elora | 217 | 135 | 1 | 7 | 0.76 | 0.72 | 0.61 | 0.62 | 0.58 | 2781.68 |
| 2016 | Canada | Elora | 218 | 236 | 1 | 7 | 0.7  | 0.67 | 0.59 | 0.66 | 0.61 | 3254.89 |
| 2016 | Canada | Elora | 219 | 24  | 1 | 7 | 0.7  | 0.62 | 0.53 | 0.57 | 0.46 | 3374.52 |
| 2016 | Canada | Elora | 220 | 265 | 1 | 7 | 0.7  | 0.67 | 0.64 | 0.61 | 0.58 | 3824.36 |
| 2016 | Canada | Elora | 221 | 20  | 1 | 7 | 0.75 | 0.71 | 0.64 | 0.62 | 0.54 | 3236.82 |
| 2016 | Canada | Elora | 222 | 223 | 1 | 7 | 0.75 | 0.7  | 0.64 | 0.66 | 0.59 | 3692.59 |
| 2016 | Canada | Elora | 223 | 252 | 1 | 7 | 0.56 | 0.58 | 0.63 | 0.67 | 0.62 | 1934.33 |
| 2016 | Canada | Elora | 224 | 259 | 1 | 7 | 0.6  | 0.58 | 0.54 | 0.64 | 0.65 | 2131.84 |
| 2016 | Canada | Elora | 225 | 84  | 1 | 8 | 0.77 | 0.71 | 0.62 | 0.54 | 0.31 | 3728.94 |
| 2016 | Canada | Elora | 226 | 189 | 1 | 8 | 0.72 | 0.68 | 0.61 | 0.63 | 0.49 | 4619.35 |
| 2016 | Canada | Elora | 227 | 154 | 1 | 8 | 0.74 | 0.67 | 0.64 | 0.61 | 0.52 | 2746.79 |
| 2016 | Canada | Elora | 228 | 133 | 1 | 8 | 0.77 | 0.64 | 0.63 | 0.68 | 0.58 | 2927.41 |
| 2016 | Canada | Elora | 229 | 237 | 1 | 8 | 0.73 | 0.68 | 0.66 | 0.65 | 0.63 | 4085.79 |
| 2016 | Canada | Elora | 230 | 159 | 1 | 8 | 0.77 | 0.71 | 0.65 | 0.62 | 0.45 | 2652.96 |
| 2016 | Canada | Elora | 231 | 270 | 1 | 8 | 0.75 | 0.72 | 0.66 | 0.65 | 0.6  | 2552.71 |
| 2016 | Canada | Elora | 232 | 180 | 1 | 8 | 0.73 | 0.68 | 0.61 | 0.56 | 0.52 | 3379.31 |
| 2016 | Canada | Elora | 233 | 123 | 1 | 8 | 0.75 | 0.68 | 0.64 | 0.64 | 0.51 | 3620.62 |
| 2016 | Canada | Elora | 234 | 256 | 1 | 8 | 0.69 | 0.64 | 0.58 | 0.56 | 0.43 | 4086.98 |
| 2016 | Canada | Elora | 235 | 104 | 1 | 8 | 0.7  | 0.75 | 0.67 | 0.63 | 0.5  | 4691.34 |
| 2016 | Canada | Elora | 236 | 304 | 1 | 8 | 0.72 | 0.69 | 0.63 | 0.52 | 0.42 | 3547.73 |
| 2016 | Canada | Elora | 237 | 40  | 1 | 8 | 0.76 | 0.73 | 0.68 | 0.67 | 0.52 | 1907.20 |
| 2016 | Canada | Elora | 238 | 288 | 1 | 8 | 0.78 | 0.72 | 0.66 | 0.5  | 0.47 | 5174.08 |
| 2016 | Canada | Elora | 239 | 280 | 1 | 8 | 0.74 | 0.7  | 0.6  | 0.56 | 0.44 | 4692.90 |
| 2016 | Canada | Elora | 240 | 32  | 1 | 8 | 0.76 | 0.68 | 0.62 | 0.63 | 0.62 | 2769.53 |
| 2016 | Canada | Elora | 241 | 122 | 1 | 8 | 0.79 | 0.79 | 0.69 | 0.66 | 0.68 | 3639.94 |
| 2016 | Canada | Elora | 242 | 172 | 1 | 8 | 0.75 | 0.68 | 0.6  | 0.55 | 0.46 | 4360.19 |
| 2016 | Canada | Elora | 243 | 71  | 1 | 8 | 0.75 | 0.67 | 0.6  | 0.58 | 0.54 | 3465.79 |
| 2016 | Canada | Elora | 244 | 299 | 1 | 8 | 0.72 | 0.68 | 0.62 | 0.55 | 0.42 | 4570.16 |
| 2016 | Canada | Elora | 245 | 121 | 1 | 8 | 0.71 | 0.65 | 0.57 | 0.55 | 0.52 | 3715.95 |
| 2016 | Canada | Elora | 246 | 218 | 1 | 8 | 0.76 | 0.71 | 0.63 | 0.58 | 0.53 | 4002.55 |
| 2016 | Canada | Elora | 247 | 41  | 1 | 8 | 0.82 | 0.74 | 0.68 | 0.65 | 0.55 | 2758.63 |
| 2016 | Canada | Elora | 248 | 238 | 1 | 8 | 0.78 | 0.67 | 0.62 | 0.62 | 0.51 | 3883.24 |
| 2016 | Canada | Elora | 249 | 229 | 1 | 8 | 0.73 | 0.67 | 0.64 | 0.66 | 0.46 | 4164.86 |



|      |        |       |     |     |   |   |      |      |      |      |      |         |
|------|--------|-------|-----|-----|---|---|------|------|------|------|------|---------|
| 2016 | Canada | Elora | 250 | 95  | 1 | 8 | 0.74 | 0.72 | 0.64 | 0.72 | 0.65 | 2707.85 |
| 2016 | Canada | Elora | 251 | 275 | 1 | 8 | 0.74 | 0.73 | 0.68 | 0.68 | 0.64 | 3993.21 |
| 2016 | Canada | Elora | 252 | 196 | 1 | 8 | 0.71 | 0.64 | 0.61 | 0.65 | 0.5  | 3894.14 |
| 2016 | Canada | Elora | 253 | 139 | 1 | 8 | 0.76 | 0.71 | 0.67 | 0.65 | 0.55 | 3246.79 |
| 2016 | Canada | Elora | 254 | 273 | 1 | 8 | 0.71 | 0.63 | 0.62 | 0.7  | 0.67 | 2570.78 |
| 2016 | Canada | Elora | 255 | 44  | 1 | 8 | 0.63 | 0.6  | 0.63 | 0.63 | 0.5  | 1959.25 |
| 2016 | Canada | Elora | 256 | 188 | 1 | 8 | 0.59 | 0.55 | 0.53 | 0.68 | 0.67 | 1996.95 |
| 2016 | Canada | Elora | 257 | 204 | 1 | 9 | 0.73 | 0.69 | 0.6  | 0.52 | 0.42 | 3197.46 |
| 2016 | Canada | Elora | 258 | 170 | 1 | 9 | 0.7  | 0.68 | 0.63 | 0.52 | 0.54 | 3764.24 |
| 2016 | Canada | Elora | 259 | 23  | 1 | 9 | 0.76 | 0.71 | 0.67 | 0.68 | 0.64 | 2717.82 |
| 2016 | Canada | Elora | 260 | 68  | 1 | 9 | 0.65 | 0.58 | 0.55 | 0.5  | 0.6  | 2880.44 |
| 2016 | Canada | Elora | 261 | 177 | 1 | 9 | 0.74 | 0.68 | 0.62 | 0.58 | 0.42 | 3880.09 |
| 2016 | Canada | Elora | 262 | 97  | 1 | 9 | 0.76 | 0.71 | 0.68 | 0.65 | 0.6  | 2142.12 |
| 2016 | Canada | Elora | 263 | 38  | 1 | 9 | 0.79 | 0.71 | 0.68 | 0.66 | 0.64 | 2957.69 |
| 2016 | Canada | Elora | 264 | 61  | 1 | 9 | 0.73 | 0.71 | 0.62 | 0.55 | 0.56 | 2741.81 |
| 2016 | Canada | Elora | 265 | 142 | 1 | 9 | 0.74 | 0.66 | 0.61 | 0.59 | 0.55 | 2378.88 |
| 2016 | Canada | Elora | 266 | 75  | 1 | 9 | 0.79 | 0.75 | 0.68 | 0.61 | 0.62 | 2048.35 |
| 2016 | Canada | Elora | 267 | 191 | 1 | 9 | 0.7  | 0.68 | 0.62 | 0.54 | 0.48 | 4363.30 |
| 2016 | Canada | Elora | 268 | 52  | 1 | 9 | 0.67 | 0.66 | 0.66 | 0.61 | 0.48 | 2730.28 |
| 2016 | Canada | Elora | 269 | 161 | 1 | 9 | 0.71 | 0.68 | 0.59 | 0.52 | 0.46 | 3271.28 |
| 2016 | Canada | Elora | 270 | 282 | 1 | 9 | 0.69 | 0.67 | 0.62 | 0.56 | 0.48 | 3380.84 |
| 2016 | Canada | Elora | 271 | 201 | 1 | 9 | 0.73 | 0.67 | 0.61 | 0.55 | 0.43 | 4940.25 |
| 2016 | Canada | Elora | 272 | 213 | 1 | 9 | 0.72 | 0.66 | 0.59 | 0.55 | 0.47 | 3610.50 |
| 2016 | Canada | Elora | 273 | 66  | 1 | 9 | 0.75 | 0.67 | 0.63 | 0.55 | 0.54 | 3762.99 |
| 2016 | Canada | Elora | 274 | 48  | 1 | 9 | 0.76 | 0.7  | 0.66 | 0.61 | 0.54 | 3106.92 |
| 2016 | Canada | Elora | 275 | 181 | 1 | 9 | 0.72 | 0.69 | 0.62 | 0.6  | 0.52 | 4588.85 |
| 2016 | Canada | Elora | 277 | 150 | 1 | 9 | 0.75 | 0.72 | 0.65 | 0.6  | 0.49 | 4601.62 |
| 2016 | Canada | Elora | 278 | 102 | 1 | 9 | 0.73 | 0.71 | 0.64 | 0.63 | 0.48 | 4891.65 |
| 2016 | Canada | Elora | 279 | 131 | 1 | 9 | 0.79 | 0.74 | 0.66 | 0.62 | 0.69 | 3158.94 |
| 2016 | Canada | Elora | 280 | 128 | 1 | 9 | 0.8  | 0.74 | 0.65 | 0.61 | 0.62 | 2440.25 |
| 2016 | Canada | Elora | 281 | 278 | 1 | 9 | 0.72 | 0.66 | 0.6  | 0.63 | 0.53 | 3446.79 |
| 2016 | Canada | Elora | 282 | 208 | 1 | 9 | 0.71 | 0.66 | 0.62 | 0.7  | 0.63 | 3044.92 |
| 2016 | Canada | Elora | 283 | 39  | 1 | 9 | 0.7  | 0.62 | 0.53 | 0.55 | 0.45 | 3743.99 |

|      |        |       |     |     |   |    |      |      |      |      |      |         |
|------|--------|-------|-----|-----|---|----|------|------|------|------|------|---------|
| 2016 | Canada | Elora | 284 | 156 | 1 | 9  | 0.75 | 0.67 | 0.63 | 0.57 | 0.55 | 3373.89 |
| 2016 | Canada | Elora | 285 | 279 | 1 | 9  | 0.71 | 0.69 | 0.65 | 0.61 | 0.51 | 4069.22 |
| 2016 | Canada | Elora | 286 | 234 | 1 | 9  | 0.7  | 0.65 | 0.6  | 0.7  | 0.63 | 2897.57 |
| 2016 | Canada | Elora | 287 | 124 | 1 | 9  | 0.67 | 0.58 | 0.55 | 0.66 | 0.66 | 1415.95 |
| 2016 | Canada | Elora | 288 | 94  | 1 | 9  | 0.64 | 0.58 | 0.53 | 0.64 | 0.61 | 1141.81 |
| 2016 | Canada | Elora | 289 | 257 | 1 | 10 | 0.56 | 0.7  | 0.65 | 0.59 | 0.58 | 4243.27 |
| 2016 | Canada | Elora | 290 | 277 | 1 | 10 | 0.7  | 0.66 | 0.6  | 0.61 | 0.55 | 3291.96 |
| 2016 | Canada | Elora | 291 | 190 | 1 | 10 | 0.7  | 0.69 | 0.68 | 0.64 | 0.5  | 3999.81 |
| 2016 | Canada | Elora | 292 | 55  | 1 | 10 | 0.77 | 0.66 | 0.6  | 0.58 | 0.54 | 1470.19 |
| 2016 | Canada | Elora | 293 | 320 | 1 | 10 | 0.75 | 0.72 | 0.64 | 0.62 | 0.54 | 5017.51 |
| 2016 | Canada | Elora | 294 | 254 | 1 | 10 | 0.72 | 0.69 | 0.61 | 0.65 | 0.56 | 3022.55 |
| 2016 | Canada | Elora | 295 | 22  | 1 | 10 | 0.7  | 0.67 | 0.57 | 0.61 | 0.49 | 3461.43 |
| 2016 | Canada | Elora | 296 | 251 | 1 | 10 | 0.6  | 0.64 | 0.58 | 0.57 | 0.49 | 3249.28 |
| 2016 | Canada | Elora | 297 | 235 | 1 | 10 | 0.74 | 0.7  | 0.6  | 0.52 | 0.47 | 3411.90 |
| 2016 | Canada | Elora | 298 | 197 | 1 | 10 | 0.61 | 0.64 | 0.52 | 0.56 | 0.41 | 2415.95 |
| 2016 | Canada | Elora | 299 | 231 | 1 | 10 | 0.73 | 0.68 | 0.58 | 0.53 | 0.42 | 3062.68 |
| 2016 | Canada | Elora | 300 | 18  | 1 | 10 | 0.69 | 0.63 | 0.58 | 0.49 | 0.41 | 2840.87 |
| 2016 | Canada | Elora | 301 | 183 | 1 | 10 | 0.74 | 0.69 | 0.67 | 0.6  | 0.4  | 4114.08 |
| 2016 | Canada | Elora | 302 | 221 | 1 | 10 | 0.73 | 0.7  | 0.61 | 0.58 | 0.51 | 2848.35 |
| 2016 | Canada | Elora | 303 | 125 | 1 | 10 | 0.75 | 0.72 | 0.67 | 0.62 | 0.4  | 2952.40 |
| 2016 | Canada | Elora | 304 | 73  | 1 | 10 | 0.68 | 0.7  | 0.54 | 0.54 | 0.45 | 2946.48 |
| 2016 | Canada | Elora | 305 | 47  | 1 | 10 | 0.71 | 0.69 | 0.64 | 0.55 | 0.41 | 3538.07 |
| 2016 | Canada | Elora | 306 | 4   | 1 | 10 | 0.79 | 0.76 | 0.69 | 0.68 | 0.65 | 3010.65 |
| 2016 | Canada | Elora | 307 | 26  | 1 | 10 | 0.71 | 0.65 | 0.64 | 0.62 | 0.56 | 3190.09 |
| 2016 | Canada | Elora | 308 | 99  | 1 | 10 | 0.78 | 0.75 | 0.66 | 0.61 | 0.59 | 2509.72 |
| 2016 | Canada | Elora | 309 | 298 | 1 | 10 | 0.74 | 0.68 | 0.63 | 0.6  | 0.58 | 4930.90 |
| 2016 | Canada | Elora | 310 | 17  | 1 | 10 | 0.64 | 0.61 | 0.58 | 0.51 | 0.43 | 3471.09 |
| 2016 | Canada | Elora | 311 | 215 | 1 | 10 | 0.76 | 0.71 | 0.61 | 0.58 | 0.42 | 4589.47 |
| 2016 | Canada | Elora | 313 | 305 | 1 | 10 | 0.74 | 0.68 | 0.61 | 0.61 | 0.51 | 3996.01 |
| 2016 | Canada | Elora | 314 | 65  | 1 | 10 | 0.65 | 0.64 | 0.6  | 0.64 | 0.53 | 2861.43 |
| 2016 | Canada | Elora | 315 | 307 | 1 | 10 | 0.71 | 0.64 | 0.61 | 0.58 | 0.54 | 3587.60 |
| 2016 | Canada | Elora | 316 | 112 | 1 | 10 | 0.73 | 0.68 | 0.65 | 0.6  | 0.44 | 3639.63 |
| 2016 | Canada | Elora | 317 | 166 | 1 | 10 | 0.74 | 0.71 | 0.63 | 0.61 | 0.51 | 3108.47 |

|      |        |       |     |     |   |    |      |      |      |      |      |         |
|------|--------|-------|-----|-----|---|----|------|------|------|------|------|---------|
| 2016 | Canada | Elora | 318 | 291 | 1 | 10 | 0.72 | 0.68 | 0.62 | 0.7  | 0.63 | 2773.89 |
| 2016 | Canada | Elora | 319 | 80  | 1 | 10 | 0.62 | 0.56 | 0.5  | 0.65 | 0.56 | 1575.14 |
| 2016 | Canada | Elora | 320 | 33  | 1 | 10 | 0.59 | 0.51 | 0.46 | 0.59 | 0.58 | 1363.30 |
| 2016 | Canada | Elora | 321 | 297 | 2 | 1  | 0.76 | 0.72 | 0.67 | 0.63 | 0.59 | 3306.20 |
| 2016 | Canada | Elora | 322 | 307 | 2 | 1  | 0.62 | 0.63 | 0.54 | 0.57 | 0.52 | 4164.11 |
| 2016 | Canada | Elora | 323 | 59  | 2 | 1  | 0.7  | 0.68 | 0.67 | 0.68 | 0.64 | 2102.55 |
| 2016 | Canada | Elora | 324 | 220 | 2 | 1  | 0.7  | 0.66 | 0.55 | 0.59 | 0.56 | 2841.18 |
| 2016 | Canada | Elora | 325 | 79  | 2 | 1  | 0.78 | 0.7  | 0.66 | 0.6  | 0.53 | 3137.13 |
| 2016 | Canada | Elora | 326 | 250 | 2 | 1  | 0.69 | 0.67 | 0.65 | 0.62 | 0.6  | 3100.62 |
| 2016 | Canada | Elora | 327 | 95  | 2 | 1  | 0.78 | 0.72 | 0.64 | 0.61 | 0.61 | 2767.04 |
| 2016 | Canada | Elora | 328 | 216 | 2 | 1  | 0.69 | 0.62 | 0.57 | 0.59 | 0.52 | 3436.14 |
| 2016 | Canada | Elora | 329 | 50  | 2 | 1  | 0.75 | 0.69 | 0.65 | 0.58 | 0.52 | 3406.92 |
| 2016 | Canada | Elora | 330 | 49  | 2 | 1  | 0.73 | 0.65 | 0.59 | 0.57 | 0.5  | 3113.46 |
| 2016 | Canada | Elora | 331 | 254 | 2 | 1  | 0.7  | 0.79 | 0.65 | 0.6  | 0.56 | 3804.05 |
| 2016 | Canada | Elora | 332 | 241 | 2 | 1  | 0.69 | 0.66 | 0.6  | 0.54 | 0.54 | 3101.00 |
| 2016 | Canada | Elora | 333 | 52  | 2 | 1  | 0.77 | 0.71 | 0.67 | 0.63 | 0.49 | 2968.60 |
| 2016 | Canada | Elora | 334 | 210 | 2 | 1  | 0.77 | 0.7  | 0.64 | 0.61 | 0.63 | 2606.70 |
| 2016 | Canada | Elora | 335 | 194 | 2 | 1  | 0.72 | 0.72 | 0.66 | 0.61 | 0.58 | 5231.65 |
| 2016 | Canada | Elora | 336 | 289 | 2 | 1  | 0.75 | 0.7  | 0.61 | 0.59 | 0.46 | 4681.71 |
| 2016 | Canada | Elora | 337 | 278 | 2 | 1  | 0.71 | 0.65 | 0.58 | 0.52 | 0.45 | 4242.43 |
| 2016 | Canada | Elora | 338 | 230 | 2 | 1  | 0.73 | 0.67 | 0.65 | 0.59 | 0.56 | 4677.94 |
| 2016 | Canada | Elora | 339 | 154 | 2 | 1  | 0.73 | 0.66 | 0.62 | 0.58 | 0.5  | 3929.66 |
| 2016 | Canada | Elora | 340 | 37  | 2 | 1  | 0.75 | 0.7  | 0.63 | 0.6  | 0.6  | 2933.40 |
| 2016 | Canada | Elora | 341 | 304 | 2 | 1  | 0.73 | 0.69 | 0.61 | 0.54 | 0.46 | 4404.74 |
| 2016 | Canada | Elora | 342 | 291 | 2 | 1  | 0.73 | 0.68 | 0.64 | 0.56 | 0.56 | 4712.83 |
| 2016 | Canada | Elora | 343 | 271 | 2 | 1  | 0.73 | 0.66 | 0.57 | 0.54 | 0.51 | 4796.01 |
| 2016 | Canada | Elora | 344 | 67  | 2 | 1  | 0.7  | 0.69 | 0.58 | 0.57 | 0.46 | 4648.04 |
| 2016 | Canada | Elora | 345 | 74  | 2 | 1  | 0.71 | 0.67 | 0.6  | 0.62 | 0.58 | 3893.83 |
| 2016 | Canada | Elora | 346 | 214 | 2 | 1  | 0.7  | 0.66 | 0.57 | 0.6  | 0.46 | 4695.08 |
| 2016 | Canada | Elora | 347 | 17  | 2 | 1  | 0.7  | 0.65 | 0.56 | 0.51 | 0.43 | 3427.79 |
| 2016 | Canada | Elora | 348 | 318 | 2 | 1  | 0.7  | 0.72 | 0.67 | 0.61 | 0.59 | 5401.31 |
| 2016 | Canada | Elora | 349 | 78  | 2 | 1  | 0.7  | 0.66 | 0.61 | 0.59 | 0.55 | 2998.82 |
| 2016 | Canada | Elora | 350 | 34  | 2 | 1  | 0.67 | 0.63 | 0.56 | 0.63 | 0.55 | 2218.13 |

|      |        |       |     |     |   |   |      |      |      |      |      |         |
|------|--------|-------|-----|-----|---|---|------|------|------|------|------|---------|
| 2016 | Canada | Elora | 351 | 20  | 2 | 1 | 0.63 | 0.59 | 0.51 | 0.64 | 0.6  | 1818.44 |
| 2016 | Canada | Elora | 352 | 231 | 2 | 1 | 0.56 | 0.51 | 0.48 | 0.61 | 0.51 | 2066.11 |
| 2016 | Canada | Elora | 353 | 173 | 2 | 2 | 0.66 | 0.65 | 0.6  | 0.55 | 0.51 | 3669.83 |
| 2016 | Canada | Elora | 354 | 151 | 2 | 2 | 0.73 | 0.67 | 0.6  | 0.61 | 0.59 | 2160.78 |
| 2016 | Canada | Elora | 355 | 204 | 2 | 2 | 0.74 | 0.71 | 0.63 | 0.57 | 0.52 | 3824.67 |
| 2016 | Canada | Elora | 356 | 126 | 2 | 2 | 0.8  | 0.73 | 0.56 | 0.57 | 0.6  | 865.48  |
| 2016 | Canada | Elora | 357 | 80  | 2 | 2 | 0.76 | 0.71 | 0.65 | 0.61 | 0.55 | 2202.80 |
| 2016 | Canada | Elora | 358 | 293 | 2 | 2 | 0.7  | 0.68 | 0.64 | 0.66 | 0.59 | 3433.74 |
| 2016 | Canada | Elora | 359 | 65  | 2 | 2 | 0.69 | 0.67 | 0.61 | 0.62 | 0.55 | 3322.27 |
| 2016 | Canada | Elora | 360 | 25  | 2 | 2 | 0.75 | 0.68 | 0.63 | 0.6  | 0.57 | 3695.79 |
| 2016 | Canada | Elora | 361 | 296 | 2 | 2 | 0.68 | 0.67 | 0.64 | 0.61 | 0.59 | 3755.83 |
| 2016 | Canada | Elora | 362 | 22  | 2 | 2 | 0.68 | 0.63 | 0.58 | 0.53 | 0.57 | 3351.34 |
| 2016 | Canada | Elora | 363 | 238 | 2 | 2 | 0.74 | 0.69 | 0.61 | 0.58 | 0.57 | 3698.82 |
| 2016 | Canada | Elora | 364 | 245 | 2 | 2 | 0.65 | 0.64 | 0.61 | 0.52 | 0.53 | 4343.36 |
| 2016 | Canada | Elora | 365 | 143 | 2 | 2 | 0.73 | 0.72 | 0.65 | 0.61 | 0.55 | 2610.90 |
| 2016 | Canada | Elora | 366 | 192 | 2 | 2 | 0.69 | 0.65 | 0.59 | 0.52 | 0.43 | 4147.73 |
| 2016 | Canada | Elora | 367 | 198 | 2 | 2 | 0.65 | 0.64 | 0.61 | 0.53 | 0.37 | 3230.28 |
| 2016 | Canada | Elora | 368 | 305 | 2 | 2 | 0.7  | 0.65 | 0.56 | 0.54 | 0.51 | 3776.07 |
| 2016 | Canada | Elora | 369 | 155 | 2 | 2 | 0.79 | 0.71 | 0.67 | 0.61 | 0.5  | 3679.19 |
| 2016 | Canada | Elora | 370 | 222 | 2 | 2 | 0.7  | 0.7  | 0.64 | 0.63 | 0.58 | 4074.52 |
| 2016 | Canada | Elora | 371 | 185 | 2 | 2 | 0.73 | 0.69 | 0.65 | 0.54 | 0.44 | 5039.63 |
| 2016 | Canada | Elora | 372 | 76  | 2 | 2 | 0.7  | 0.69 | 0.63 | 0.58 | 0.54 | 3486.98 |
| 2016 | Canada | Elora | 374 | 142 | 2 | 2 | 0.72 | 0.69 | 0.57 | 0.5  | 0.56 | 2948.66 |
| 2016 | Canada | Elora | 375 | 146 | 2 | 2 | 0.7  | 0.64 | 0.65 | 0.66 | 0.57 | 3038.69 |
| 2016 | Canada | Elora | 376 | 228 | 2 | 2 | 0.69 | 0.66 | 0.58 | 0.58 | 0.57 | 3646.17 |
| 2016 | Canada | Elora | 377 | 161 | 2 | 2 | 0.71 | 0.66 | 0.59 | 0.59 | 0.48 | 3492.59 |
| 2016 | Canada | Elora | 378 | 33  | 2 | 2 | 0.75 | 0.66 | 0.61 | 0.61 | 0.55 | 3188.85 |
| 2016 | Canada | Elora | 379 | 32  | 2 | 2 | 0.76 | 0.7  | 0.65 | 0.6  | 0.5  | 3906.29 |
| 2016 | Canada | Elora | 380 | 265 | 2 | 2 | 0.66 | 0.68 | 0.61 | 0.54 | 0.55 | 3152.09 |
| 2016 | Canada | Elora | 381 | 255 | 2 | 2 | 0.68 | 0.65 | 0.59 | 0.58 | 0.47 | 4345.86 |
| 2016 | Canada | Elora | 382 | 101 | 2 | 2 | 0.65 | 0.59 | 0.55 | 0.64 | 0.53 | 2548.66 |
| 2016 | Canada | Elora | 383 | 234 | 2 | 2 | 0.62 | 0.6  | 0.53 | 0.64 | 0.56 | 2508.79 |
| 2016 | Canada | Elora | 384 | 217 | 2 | 2 | 0.56 | 0.5  | 0.54 | 0.62 | 0.6  | 1628.41 |

|      |        |       |     |     |   |   |      |      |      |      |      |         |
|------|--------|-------|-----|-----|---|---|------|------|------|------|------|---------|
| 2016 | Canada | Elora | 385 | 314 | 2 | 3 | 0.63 | 0.59 | 0.55 | 0.48 | 0.41 | 2877.85 |
| 2016 | Canada | Elora | 387 | 225 | 2 | 3 | 0.71 | 0.67 | 0.59 | 0.53 | 0.49 | 2923.12 |
| 2016 | Canada | Elora | 388 | 69  | 2 | 3 | 0.72 | 0.66 | 0.6  | 0.59 | 0.53 | 1015.64 |
| 2016 | Canada | Elora | 389 | 26  | 2 | 3 | 0.77 | 0.69 | 0.66 | 0.65 | 0.58 | 974.21  |
| 2016 | Canada | Elora | 390 | 1   | 2 | 3 | 0.78 | 0.73 | 0.7  | 0.68 | 0.69 | 2247.54 |
| 2016 | Canada | Elora | 391 | 268 | 2 | 3 | 0.73 | 0.7  | 0.64 | 0.63 | 0.58 | 4044.98 |
| 2016 | Canada | Elora | 392 | 158 | 2 | 3 | 0.75 | 0.67 | 0.61 | 0.6  | 0.53 | 2549.44 |
| 2016 | Canada | Elora | 393 | 117 | 2 | 3 | 0.72 | 0.67 | 0.57 | 0.53 | 0.5  | 2997.57 |
| 2016 | Canada | Elora | 394 | 2   | 2 | 3 | 0.8  | 0.76 | 0.66 | 0.64 | 0.6  | 1758.01 |
| 2016 | Canada | Elora | 395 | 189 | 2 | 3 | 0.77 | 0.71 | 0.62 | 0.57 | 0.53 | 4907.66 |
| 2016 | Canada | Elora | 396 | 91  | 2 | 3 | 0.74 | 0.68 | 0.6  | 0.68 | 0.46 | 3443.21 |
| 2016 | Canada | Elora | 397 | 207 | 2 | 3 | 0.72 | 0.7  | 0.65 | 0.6  | 0.55 | 3651.93 |
| 2016 | Canada | Elora | 398 | 86  | 2 | 3 | 0.77 | 0.71 | 0.65 | 0.63 | 0.57 | 2207.85 |
| 2016 | Canada | Elora | 399 | 136 | 2 | 3 | 0.8  | 0.73 | 0.68 | 0.59 | 0.58 | 3223.27 |
| 2016 | Canada | Elora | 400 | 72  | 2 | 3 | 0.72 | 0.68 | 0.61 | 0.57 | 0.49 | 2957.69 |
| 2016 | Canada | Elora | 401 | 43  | 2 | 3 | 0.74 | 0.68 | 0.6  | 0.55 | 0.57 | 3005.98 |
| 2016 | Canada | Elora | 402 | 177 | 2 | 3 | 0.66 | 0.59 | 0.53 | 0.51 | 0.44 | 3567.98 |
| 2016 | Canada | Elora | 403 | 240 | 2 | 3 | 0.71 | 0.66 | 0.59 | 0.52 | 0.47 | 4006.29 |
| 2016 | Canada | Elora | 404 | 40  | 2 | 3 | 0.73 | 0.65 | 0.59 | 0.52 | 0.54 | 2395.39 |
| 2016 | Canada | Elora | 405 | 137 | 2 | 3 | 0.77 | 0.7  | 0.65 | 0.61 | 0.55 | 2997.88 |
| 2016 | Canada | Elora | 406 | 211 | 2 | 3 | 0.71 | 0.66 | 0.59 | 0.53 | 0.54 | 3302.87 |
| 2016 | Canada | Elora | 407 | 6   | 2 | 3 | 0.75 | 0.68 | 0.59 | 0.61 | 0.61 | 2959.56 |
| 2016 | Canada | Elora | 408 | 205 | 2 | 3 | 0.64 | 0.67 | 0.53 | 0.45 | 0.58 | 3284.17 |
| 2016 | Canada | Elora | 409 | 269 | 2 | 3 | 0.61 | 0.61 | 0.58 | 0.63 | 0.52 | 2489.16 |
| 2016 | Canada | Elora | 410 | 7   | 2 | 3 | 0.73 | 0.7  | 0.56 | 0.63 | 0.55 | 4014.70 |
| 2016 | Canada | Elora | 411 | 197 | 2 | 3 | 0.67 | 0.59 | 0.53 | 0.51 | 0.43 | 2549.28 |
| 2016 | Canada | Elora | 412 | 243 | 2 | 3 | 0.67 | 0.65 | 0.55 | 0.53 | 0.52 | 3478.26 |
| 2016 | Canada | Elora | 413 | 148 | 2 | 3 | 0.75 | 0.69 | 0.66 | 0.64 | 0.52 | 2846.48 |
| 2016 | Canada | Elora | 414 | 19  | 2 | 3 | 0.54 | 0.56 | 0.51 | 0.48 | 0.45 | 2116.57 |
| 2016 | Canada | Elora | 415 | 152 | 2 | 3 | 0.5  | 0.52 | 0.5  | 0.61 | 0.58 | 1855.20 |
| 2016 | Canada | Elora | 416 | 58  | 2 | 3 | 0.64 | 0.58 | 0.53 | 0.59 | 0.57 | 1637.13 |
| 2016 | Canada | Elora | 417 | 288 | 2 | 4 | 0.73 | 0.69 | 0.57 | 0.53 | 0.47 | 4153.54 |
| 2016 | Canada | Elora | 418 | 171 | 2 | 4 | 0.63 | 0.55 | 0.52 | 0.43 | 0.39 | 2474.52 |

|      |        |       |     |     |   |   |      |      |      |      |      |         |
|------|--------|-------|-----|-----|---|---|------|------|------|------|------|---------|
| 2016 | Canada | Elora | 419 | 138 | 2 | 4 | 0.78 | 0.7  | 0.59 | 0.57 | 0.51 | 2624.05 |
| 2016 | Canada | Elora | 420 | 5   | 2 | 4 | 0.77 | 0.68 | 0.63 | 0.56 | 0.55 | 1328.10 |
| 2016 | Canada | Elora | 421 | 66  | 2 | 4 | 0.74 | 0.67 | 0.63 | 0.56 | 0.54 | 927.48  |
| 2016 | Canada | Elora | 422 | 312 | 2 | 4 | 0.74 | 0.7  | 0.65 | 0.62 | 0.55 | 5064.55 |
| 2016 | Canada | Elora | 423 | 44  | 2 | 4 | 0.77 | 0.69 | 0.65 | 0.6  | 0.56 | 2706.29 |
| 2016 | Canada | Elora | 424 | 23  | 2 | 4 | 0.74 | 0.74 | 0.66 | 0.63 | 0.61 | 1646.45 |
| 2016 | Canada | Elora | 425 | 313 | 2 | 4 | 0.76 | 0.7  | 0.63 | 0.56 | 0.51 | 3856.14 |
| 2016 | Canada | Elora | 426 | 244 | 2 | 4 | 0.72 | 0.68 | 0.62 | 0.54 | 0.53 | 4365.17 |
| 2016 | Canada | Elora | 427 | 12  | 2 | 4 | 0.74 | 0.68 | 0.63 | 0.5  | 0.41 | 3707.54 |
| 2016 | Canada | Elora | 428 | 159 | 2 | 4 | 0.75 | 0.67 | 0.62 | 0.59 | 0.52 | 2757.35 |
| 2016 | Canada | Elora | 429 | 96  | 2 | 4 | 0.81 | 0.77 | 0.69 | 0.67 | 0.7  | 2856.45 |
| 2016 | Canada | Elora | 430 | 134 | 2 | 4 | 0.71 | 0.63 | 0.55 | 0.5  | 0.49 | 2912.21 |
| 2016 | Canada | Elora | 431 | 131 | 2 | 4 | 0.78 | 0.73 | 0.63 | 0.63 | 0.66 | 2668.72 |
| 2016 | Canada | Elora | 432 | 302 | 2 | 4 | 0.68 | 0.7  | 0.59 | 0.48 | 0.43 | 3014.14 |
| 2016 | Canada | Elora | 433 | 175 | 2 | 4 | 0.72 | 0.64 | 0.61 | 0.56 | 0.47 | 5158.94 |
| 2016 | Canada | Elora | 434 | 165 | 2 | 4 | 0.75 | 0.7  | 0.64 | 0.62 | 0.55 | 2438.82 |
| 2016 | Canada | Elora | 435 | 279 | 2 | 4 | 0.72 | 0.69 | 0.57 | 0.52 | 0.44 | 4607.48 |
| 2016 | Canada | Elora | 436 | 102 | 2 | 4 | 0.68 | 0.69 | 0.6  | 0.52 | 0.42 | 4152.40 |
| 2016 | Canada | Elora | 437 | 163 | 2 | 4 | 0.74 | 0.68 | 0.61 | 0.53 | 0.49 | 2991.65 |
| 2016 | Canada | Elora | 438 | 21  | 2 | 4 | 0.68 | 0.64 | 0.51 | 0.46 | 0.51 | 2427.17 |
| 2016 | Canada | Elora | 439 | 309 | 2 | 4 | 0.74 | 0.7  | 0.59 | 0.54 | 0.46 | 3404.11 |
| 2016 | Canada | Elora | 440 | 139 | 2 | 4 | 0.77 | 0.7  | 0.63 | 0.6  | 0.52 | 3463.71 |
| 2016 | Canada | Elora | 441 | 149 | 2 | 4 | 0.73 | 0.67 | 0.5  | 0.57 | 0.51 | 3591.34 |
| 2016 | Canada | Elora | 442 | 98  | 2 | 4 | 0.69 | 0.65 | 0.54 | 0.55 | 0.34 | 3828.10 |
| 2016 | Canada | Elora | 443 | 39  | 2 | 4 | 0.68 | 0.59 | 0.52 | 0.42 | 0.35 | 3474.21 |
| 2016 | Canada | Elora | 444 | 31  | 2 | 4 | 0.8  | 0.75 | 0.66 | 0.6  | 0.58 | 3248.97 |
| 2016 | Canada | Elora | 445 | 81  | 2 | 4 | 0.75 | 0.69 | 0.65 | 0.62 | 0.5  | 2861.74 |
| 2016 | Canada | Elora | 446 | 124 | 2 | 4 | 0.66 | 0.63 | 0.55 | 0.63 | 0.61 | 1924.05 |
| 2016 | Canada | Elora | 447 | 68  | 2 | 4 | 0.58 | 0.52 | 0.52 | 0.59 | 0.53 | 2201.93 |
| 2016 | Canada | Elora | 448 | 256 | 2 | 4 | 0.53 | 0.51 | 0.4  | 0.51 | 0.49 | 2495.39 |
| 2016 | Canada | Elora | 449 | 252 | 2 | 5 | 0.61 | 0.6  | 0.54 | 0.43 | 0.49 | 3417.83 |
| 2016 | Canada | Elora | 450 | 88  | 2 | 5 | 0.72 | 0.63 | 0.57 | 0.52 | 0.59 | 967.98  |
| 2016 | Canada | Elora | 451 | 46  | 2 | 5 | 0.69 | 0.66 | 0.6  | 0.59 | 0.43 | 3492.27 |

|      |        |       |     |     |   |   |      |      |      |      |      |         |
|------|--------|-------|-----|-----|---|---|------|------|------|------|------|---------|
| 2016 | Canada | Elora | 452 | 61  | 2 | 5 | 0.76 | 0.72 | 0.64 | 0.59 | 0.48 | 2444.61 |
| 2016 | Canada | Elora | 453 | 295 | 2 | 5 | 0.68 | 0.65 | 0.58 | 0.57 | 0.51 | 4026.11 |
| 2016 | Canada | Elora | 454 | 251 | 2 | 5 | 0.7  | 0.59 | 0.53 | 0.54 | 0.48 | 3207.29 |
| 2016 | Canada | Elora | 455 | 196 | 2 | 5 | 0.63 | 0.53 | 0.59 | 0.54 | 0.44 | 2411.81 |
| 2016 | Canada | Elora | 456 | 93  | 2 | 5 | 0.74 | 0.63 | 0.68 | 0.61 | 0.47 | 3843.30 |
| 2016 | Canada | Elora | 457 | 290 | 2 | 5 | 0.74 | 0.69 | 0.61 | 0.55 | 0.41 | 3934.08 |
| 2016 | Canada | Elora | 458 | 118 | 2 | 5 | 0.76 | 0.69 | 0.59 | 0.55 | 0.52 | 2820.31 |
| 2016 | Canada | Elora | 459 | 193 | 2 | 5 | 0.75 | 0.83 | 0.59 | 0.5  | 0.39 | 3268.01 |
| 2016 | Canada | Elora | 460 | 229 | 2 | 5 | 0.68 | 0.66 | 0.55 | 0.46 | 0.34 | 3313.46 |
| 2016 | Canada | Elora | 461 | 274 | 2 | 5 | 0.72 | 0.8  | 0.62 | 0.59 | 0.48 | 3800.69 |
| 2016 | Canada | Elora | 462 | 4   | 2 | 5 | 0.75 | 0.66 | 0.58 | 0.57 | 0.62 | 1534.95 |
| 2016 | Canada | Elora | 463 | 127 | 2 | 5 | 0.71 | 0.75 | 0.63 | 0.62 | 0.57 | 2263.71 |
| 2016 | Canada | Elora | 464 | 122 | 2 | 5 | 0.78 | 0.84 | 0.69 | 0.59 | 0.62 | 2010.03 |
| 2016 | Canada | Elora | 465 | 282 | 2 | 5 | 0.69 | 0.65 | 0.57 | 0.48 | 0.43 | 3407.54 |
| 2016 | Canada | Elora | 466 | 264 | 2 | 5 | 0.68 | 0.65 | 0.55 | 0.49 | 0.43 | 4461.43 |
| 2016 | Canada | Elora | 467 | 71  | 2 | 5 | 0.73 | 0.66 | 0.62 | 0.5  | 0.47 | 3629.75 |
| 2016 | Canada | Elora | 468 | 164 | 2 | 5 | 0.75 | 0.69 | 0.62 | 0.58 | 0.55 | 2619.38 |
| 2016 | Canada | Elora | 469 | 179 | 2 | 5 | 0.72 | 0.59 | 0.54 | 0.45 | 0.31 | 4555.51 |
| 2016 | Canada | Elora | 470 | 53  | 2 | 5 | 0.75 | 0.69 | 0.61 | 0.55 | 0.56 | 2480.12 |
| 2016 | Canada | Elora | 471 | 82  | 2 | 5 | 0.71 | 0.65 | 0.55 | 0.5  | 0.47 | 2368.60 |
| 2016 | Canada | Elora | 472 | 30  | 2 | 5 | 0.63 | 0.62 | 0.5  | 0.48 | 0.4  | 2757.69 |
| 2016 | Canada | Elora | 473 | 206 | 2 | 5 | 0.64 | 0.6  | 0.54 | 0.54 | 0.44 | 4048.97 |
| 2016 | Canada | Elora | 474 | 294 | 2 | 5 | 0.7  | 0.65 | 0.53 | 0.56 | 0.48 | 3754.58 |
| 2016 | Canada | Elora | 475 | 87  | 2 | 5 | 0.75 | 0.69 | 0.63 | 0.58 | 0.62 | 2405.36 |
| 2016 | Canada | Elora | 476 | 107 | 2 | 5 | 0.67 | 0.63 | 0.51 | 0.49 | 0.38 | 2579.19 |
| 2016 | Canada | Elora | 477 | 195 | 2 | 5 | 0.69 | 0.67 | 0.57 | 0.54 | 0.48 | 3296.32 |
| 2016 | Canada | Elora | 478 | 13  | 2 | 5 | 0.57 | 0.51 | 0.42 | 0.57 | 0.58 | 1891.96 |
| 2016 | Canada | Elora | 479 | 110 | 2 | 5 | 0.64 | 0.58 | 0.49 | 0.51 | 0.46 | 1558.63 |
| 2016 | Canada | Elora | 480 | 181 | 2 | 5 | 0.64 | 0.6  | 0.5  | 0.47 | 0.43 | 2536.20 |
| 2016 | Canada | Elora | 481 | 253 | 2 | 6 | 0.74 | 0.7  | 0.62 | 0.53 | 0.52 | 3284.26 |
| 2016 | Canada | Elora | 482 | 108 | 2 | 6 | 0.73 | 0.65 | 0.59 | 0.5  | 0.49 | 1338.07 |
| 2016 | Canada | Elora | 483 | 277 | 2 | 6 | 0.68 | 0.62 | 0.57 | 0.51 | 0.5  | 3421.71 |
| 2016 | Canada | Elora | 484 | 104 | 2 | 6 | 0.7  | 0.72 | 0.67 | 0.57 | 0.54 | 4391.96 |

|      |        |       |     |     |   |   |      |      |      |      |      |         |
|------|--------|-------|-----|-----|---|---|------|------|------|------|------|---------|
| 2016 | Canada | Elora | 485 | 84  | 2 | 6 | 0.69 | 0.63 | 0.6  | 0.53 | 0.46 | 3598.63 |
| 2016 | Canada | Elora | 486 | 316 | 2 | 6 | 0.7  | 0.67 | 0.61 | 0.62 | 0.55 | 2663.55 |
| 2016 | Canada | Elora | 487 | 190 | 2 | 6 | 0.72 | 0.64 | 0.61 | 0.54 | 0.49 | 3038.38 |
| 2016 | Canada | Elora | 488 | 266 | 2 | 6 | 0.7  | 0.7  | 0.63 | 0.59 | 0.54 | 4178.26 |
| 2016 | Canada | Elora | 489 | 54  | 2 | 6 | 0.78 | 0.73 | 0.62 | 0.63 | 0.68 | 2617.51 |
| 2016 | Canada | Elora | 490 | 120 | 2 | 6 | 0.71 | 0.64 | 0.54 | 0.42 | 0.37 | 2495.08 |
| 2016 | Canada | Elora | 491 | 187 | 2 | 6 | 0.74 | 0.67 | 0.5  | 0.48 | 0.34 | 3169.22 |
| 2016 | Canada | Elora | 492 | 114 | 2 | 6 | 0.73 | 0.66 | 0.55 | 0.45 | 0.38 | 3185.11 |
| 2016 | Canada | Elora | 493 | 262 | 2 | 6 | 0.76 | 0.68 | 0.61 | 0.54 | 0.48 | 3516.11 |
| 2016 | Canada | Elora | 494 | 168 | 2 | 6 | 0.56 | 0.58 | 0.46 | 0.45 | 0.37 | 2543.99 |
| 2016 | Canada | Elora | 495 | 236 | 2 | 6 | 0.73 | 0.66 | 0.58 | 0.51 | 0.41 | 3450.53 |
| 2016 | Canada | Elora | 496 | 111 | 2 | 6 | 0.8  | 0.72 | 0.6  | 0.6  | 0.65 | 2448.97 |
| 2016 | Canada | Elora | 497 | 119 | 2 | 6 | 0.78 | 0.69 | 0.59 | 0.48 | 0.52 | 3142.74 |
| 2016 | Canada | Elora | 498 | 106 | 2 | 6 | 0.74 | 0.68 | 0.63 | 0.57 | 0.55 | 2483.24 |
| 2016 | Canada | Elora | 499 | 156 | 2 | 6 | 0.74 | 0.68 | 0.61 | 0.54 | 0.42 | 3541.28 |
| 2016 | Canada | Elora | 500 | 200 | 2 | 6 | 0.75 | 0.69 | 0.62 | 0.53 | 0.48 | 4059.88 |
| 2016 | Canada | Elora | 501 | 100 | 2 | 6 | 0.73 | 0.68 | 0.58 | 0.47 | 0.34 | 3740.25 |
| 2016 | Canada | Elora | 502 | 286 | 2 | 6 | 0.71 | 0.63 | 0.52 | 0.41 | 0.29 | 3469.22 |
| 2016 | Canada | Elora | 503 | 123 | 2 | 6 | 0.68 | 0.62 | 0.51 | 0.43 | 0.38 | 2291.03 |
| 2016 | Canada | Elora | 504 | 235 | 2 | 6 | 0.7  | 0.62 | 0.54 | 0.49 | 0.35 | 2835.58 |
| 2016 | Canada | Elora | 505 | 27  | 2 | 6 | 0.76 | 0.69 | 0.59 | 0.5  | 0.6  | 2851.46 |
| 2016 | Canada | Elora | 506 | 129 | 2 | 6 | 0.78 | 0.66 | 0.54 | 0.53 | 0.51 | 2247.41 |
| 2016 | Canada | Elora | 507 | 180 | 2 | 6 | 0.66 | 0.61 | 0.5  | 0.4  | 0.29 | 3793.52 |
| 2016 | Canada | Elora | 508 | 105 | 2 | 6 | 0.64 | 0.58 | 0.42 | 0.36 | 0.35 | 3489.16 |
| 2016 | Canada | Elora | 509 | 170 | 2 | 6 | 0.7  | 0.65 | 0.54 | 0.49 | 0.48 | 3498.50 |
| 2016 | Canada | Elora | 510 | 239 | 2 | 6 | 0.54 | 0.48 | 0.42 | 0.59 | 0.59 | 2375.45 |
| 2016 | Canada | Elora | 511 | 237 | 2 | 6 | 0.65 | 0.6  | 0.53 | 0.57 | 0.5  | 3351.46 |
| 2016 | Canada | Elora | 512 | 287 | 2 | 6 | 0.55 | 0.48 | 0.48 | 0.51 | 0.5  | 2954.89 |
| 2016 | Canada | Elora | 513 | 77  | 2 | 7 | 0.77 | 0.7  | 0.63 | 0.59 | 0.55 | 3010.03 |
| 2016 | Canada | Elora | 514 | 10  | 2 | 7 | 0.74 | 0.6  | 0.61 | 0.52 | 0.55 | 2147.41 |
| 2016 | Canada | Elora | 515 | 145 | 2 | 7 | 0.77 | 0.68 | 0.61 | 0.54 | 0.53 | 2133.89 |
| 2016 | Canada | Elora | 516 | 48  | 2 | 7 | 0.74 | 0.64 | 0.61 | 0.56 | 0.47 | 1104.42 |
| 2016 | Canada | Elora | 517 | 226 | 2 | 7 | 0.72 | 0.68 | 0.63 | 0.57 | 0.47 | 3299.75 |



|      |        |       |     |     |   |   |      |      |      |      |      |         |
|------|--------|-------|-----|-----|---|---|------|------|------|------|------|---------|
| 2016 | Canada | Elora | 518 | 306 | 2 | 7 | 0.7  | 0.68 | 0.64 | 0.6  | 0.49 | 3160.19 |
| 2016 | Canada | Elora | 519 | 103 | 2 | 7 | 0.8  | 0.76 | 0.67 | 0.64 | 0.6  | 1406.60 |
| 2016 | Canada | Elora | 520 | 246 | 2 | 7 | 0.68 | 0.67 | 0.55 | 0.52 | 0.49 | 3276.23 |
| 2016 | Canada | Elora | 521 | 62  | 2 | 7 | 0.74 | 0.68 | 0.58 | 0.53 | 0.4  | 1973.58 |
| 2016 | Canada | Elora | 522 | 36  | 2 | 7 | 0.78 | 0.71 | 0.61 | 0.52 | 0.54 | 1662.06 |
| 2016 | Canada | Elora | 523 | 320 | 2 | 7 | 0.75 | 0.69 | 0.63 | 0.48 | 0.44 | 4169.84 |
| 2016 | Canada | Elora | 524 | 218 | 2 | 7 | 0.76 | 0.69 | 0.61 | 0.5  | 0.45 | 2991.93 |
| 2016 | Canada | Elora | 525 | 75  | 2 | 7 | 0.8  | 0.76 | 0.64 | 0.59 | 0.58 | 2016.88 |
| 2016 | Canada | Elora | 526 | 272 | 2 | 7 | 0.71 | 0.64 | 0.49 | 0.41 | 0.3  | 3581.68 |
| 2016 | Canada | Elora | 527 | 132 | 2 | 7 | 0.79 | 0.76 | 0.52 | 0.56 | 0.52 | 1172.34 |
| 2016 | Canada | Elora | 528 | 292 | 2 | 7 | 0.66 | 0.6  | 0.51 | 0.41 | 0.37 | 2905.36 |
| 2016 | Canada | Elora | 529 | 184 | 2 | 7 | 0.74 | 0.59 | 0.48 | 0.44 | 0.31 | 3931.21 |
| 2016 | Canada | Elora | 530 | 221 | 2 | 7 | 0.66 | 0.63 | 0.51 | 0.45 | 0.39 | 3400.06 |
| 2016 | Canada | Elora | 531 | 261 | 2 | 7 | 0.68 | 0.62 | 0.51 | 0.47 | 0.33 | 4054.58 |
| 2016 | Canada | Elora | 532 | 147 | 2 | 7 | 0.75 | 0.71 | 0.61 | 0.59 | 0.42 | 3219.22 |
| 2016 | Canada | Elora | 533 | 224 | 2 | 7 | 0.72 | 0.67 | 0.54 | 0.5  | 0.4  | 4258.63 |
| 2016 | Canada | Elora | 534 | 263 | 2 | 7 | 0.66 | 0.6  | 0.5  | 0.45 | 0.37 | 3276.70 |
| 2016 | Canada | Elora | 535 | 24  | 2 | 7 | 0.69 | 0.64 | 0.5  | 0.41 | 0.34 | 2529.44 |
| 2016 | Canada | Elora | 536 | 115 | 2 | 7 | 0.77 | 0.7  | 0.6  | 0.61 | 0.58 | 1953.96 |
| 2016 | Canada | Elora | 537 | 247 | 2 | 7 | 0.71 | 0.68 | 0.58 | 0.54 | 0.51 | 3986.98 |
| 2016 | Canada | Elora | 538 | 299 | 2 | 7 | 0.7  | 0.62 | 0.51 | 0.47 | 0.43 | 3347.10 |
| 2016 | Canada | Elora | 539 | 285 | 2 | 7 | 0.72 | 0.69 | 0.61 | 0.57 | 0.51 | 3908.47 |
| 2016 | Canada | Elora | 540 | 35  | 2 | 7 | 0.63 | 0.62 | 0.51 | 0.46 | 0.36 | 3444.30 |
| 2016 | Canada | Elora | 541 | 174 | 2 | 7 | 0.71 | 0.64 | 0.54 | 0.54 | 0.45 | 3588.22 |
| 2016 | Canada | Elora | 542 | 133 | 2 | 7 | 0.61 | 0.49 | 0.45 | 0.54 | 0.43 | 1823.74 |
| 2016 | Canada | Elora | 543 | 121 | 2 | 7 | 0.64 | 0.57 | 0.48 | 0.54 | 0.54 | 1727.17 |
| 2016 | Canada | Elora | 544 | 172 | 2 | 7 | 0.62 | 0.59 | 0.55 | 0.54 | 0.51 | 2162.99 |
| 2016 | Canada | Elora | 545 | 8   | 2 | 8 | 0.71 | 0.66 | 0.6  | 0.52 | 0.44 | 1966.71 |
| 2016 | Canada | Elora | 546 | 47  | 2 | 8 | 0.71 | 0.61 | 0.51 | 0.48 | 0.38 | 3026.48 |
| 2016 | Canada | Elora | 547 | 212 | 2 | 8 | 0.74 | 0.69 | 0.58 | 0.48 | 0.36 | 4848.04 |
| 2016 | Canada | Elora | 548 | 215 | 2 | 8 | 0.73 | 0.66 | 0.55 | 0.53 | 0.37 | 2858.88 |
| 2016 | Canada | Elora | 549 | 14  | 2 | 8 | 0.8  | 0.83 | 0.63 | 0.61 | 0.61 | 638.69  |
| 2016 | Canada | Elora | 550 | 258 | 2 | 8 | 0.73 | 0.66 | 0.56 | 0.49 | 0.35 | 3260.19 |

|      |        |       |     |     |   |   |      |      |      |      |      |         |
|------|--------|-------|-----|-----|---|---|------|------|------|------|------|---------|
| 2016 | Canada | Elora | 551 | 169 | 2 | 8 | 0.66 | 0.61 | 0.49 | 0.47 | 0.41 | 2141.40 |
| 2016 | Canada | Elora | 552 | 203 | 2 | 8 | 0.68 | 0.66 | 0.52 | 0.51 | 0.41 | 3154.92 |
| 2016 | Canada | Elora | 553 | 178 | 2 | 8 | 0.65 | 0.62 | 0.49 | 0.4  | 0.28 | 2882.77 |
| 2016 | Canada | Elora | 554 | 257 | 2 | 8 | 0.7  | 0.61 | 0.56 | 0.52 | 0.52 | 3101.81 |
| 2016 | Canada | Elora | 555 | 141 | 2 | 8 | 0.71 | 0.65 | 0.52 | 0.41 | 0.36 | 3073.58 |
| 2016 | Canada | Elora | 556 | 83  | 2 | 8 | 0.72 | 0.63 | 0.56 | 0.5  | 0.37 | 2238.07 |
| 2016 | Canada | Elora | 557 | 89  | 2 | 8 | 0.76 | 0.72 | 0.58 | 0.57 | 0.54 | 1824.67 |
| 2016 | Canada | Elora | 558 | 113 | 2 | 8 | 0.75 | 0.68 | 0.6  | 0.54 | 0.56 | 1679.35 |
| 2016 | Canada | Elora | 559 | 135 | 2 | 8 | 0.7  | 0.63 | 0.53 | 0.48 | 0.51 | 1981.68 |
| 2016 | Canada | Elora | 560 | 56  | 2 | 8 | 0.74 | 0.69 | 0.6  | 0.53 | 0.5  | 3849.28 |
| 2016 | Canada | Elora | 561 | 166 | 2 | 8 | 0.72 | 0.69 | 0.61 | 0.57 | 0.44 | 3554.58 |
| 2016 | Canada | Elora | 562 | 199 | 2 | 8 | 0.65 | 0.6  | 0.47 | 0.39 | 0.35 | 3675.14 |
| 2016 | Canada | Elora | 563 | 92  | 2 | 8 | 0.77 | 0.7  | 0.59 | 0.57 | 0.54 | 2458.32 |
| 2016 | Canada | Elora | 564 | 60  | 2 | 8 | 0.74 | 0.69 | 0.6  | 0.55 | 0.48 | 4078.88 |
| 2016 | Canada | Elora | 565 | 97  | 2 | 8 | 0.78 | 0.7  | 0.6  | 0.56 | 0.52 | 2374.83 |
| 2016 | Canada | Elora | 566 | 280 | 2 | 8 | 0.65 | 0.55 | 0.5  | 0.38 | 0.32 | 3877.63 |
| 2016 | Canada | Elora | 567 | 15  | 2 | 8 | 0.7  | 0.68 | 0.6  | 0.6  | 0.64 | 2132.46 |
| 2016 | Canada | Elora | 568 | 38  | 2 | 8 | 0.73 | 0.71 | 0.59 | 0.55 | 0.59 | 2623.43 |
| 2016 | Canada | Elora | 569 | 70  | 2 | 8 | 0.74 | 0.68 | 0.58 | 0.52 | 0.39 | 2780.75 |
| 2016 | Canada | Elora | 570 | 116 | 2 | 8 | 0.78 | 0.72 | 0.61 | 0.61 | 0.56 | 2624.67 |
| 2016 | Canada | Elora | 571 | 259 | 2 | 8 | 0.67 | 0.59 | 0.5  | 0.46 | 0.42 | 3497.88 |
| 2016 | Canada | Elora | 572 | 301 | 2 | 8 | 0.69 | 0.61 | 0.52 | 0.4  | 0.38 | 2869.84 |
| 2016 | Canada | Elora | 573 | 153 | 2 | 8 | 0.75 | 0.7  | 0.61 | 0.65 | 0.6  | 2436.20 |
| 2016 | Canada | Elora | 574 | 232 | 2 | 8 | 0.54 | 0.45 | 0.41 | 0.55 | 0.55 | 1709.10 |
| 2016 | Canada | Elora | 575 | 11  | 2 | 8 | 0.7  | 0.62 | 0.57 | 0.55 | 0.52 | 2294.77 |
| 2016 | Canada | Elora | 576 | 300 | 2 | 8 | 0.63 | 0.56 | 0.51 | 0.59 | 0.55 | 2767.66 |
| 2016 | Canada | Elora | 577 | 57  | 2 | 9 | 0.73 | 0.66 | 0.61 | 0.55 | 0.55 | 2637.76 |
| 2016 | Canada | Elora | 578 | 18  | 2 | 9 | 0.65 | 0.66 | 0.49 | 0.39 | 0.36 | 2931.53 |
| 2016 | Canada | Elora | 579 | 90  | 2 | 9 | 0.75 | 0.6  | 0.55 | 0.55 | 0.49 | 1558.32 |
| 2016 | Canada | Elora | 580 | 223 | 2 | 9 | 0.69 | 0.66 | 0.49 | 0.49 | 0.43 | 2925.92 |
| 2016 | Canada | Elora | 581 | 186 | 2 | 9 | 0.64 | 0.52 | 0.38 | 0.38 | 0.33 | 2372.65 |
| 2016 | Canada | Elora | 582 | 9   | 2 | 9 | 0.74 | 0.72 | 0.55 | 0.55 | 0.53 | 2389.41 |
| 2016 | Canada | Elora | 583 | 140 | 2 | 9 | 0.71 | 0.6  | 0.51 | 0.41 | 0.37 | 1771.03 |

|      |        |       |     |     |   |    |      |      |      |      |      |         |
|------|--------|-------|-----|-----|---|----|------|------|------|------|------|---------|
| 2016 | Canada | Elora | 584 | 29  | 2 | 9  | 0.72 | 0.57 | 0.41 | 0.41 | 0.44 | 2157.29 |
| 2016 | Canada | Elora | 585 | 130 | 2 | 9  | 0.75 | 0.66 | 0.56 | 0.49 | 0.56 | 1858.32 |
| 2016 | Canada | Elora | 586 | 63  | 2 | 9  | 0.73 | 0.63 | 0.53 | 0.46 | 0.43 | 1619.38 |
| 2016 | Canada | Elora | 587 | 298 | 2 | 9  | 0.69 | 0.61 | 0.52 | 0.45 | 0.48 | 3042.68 |
| 2016 | Canada | Elora | 588 | 319 | 2 | 9  | 0.75 | 0.66 | 0.54 | 0.51 | 0.35 | 3961.84 |
| 2016 | Canada | Elora | 589 | 219 | 2 | 9  | 0.68 | 0.61 | 0.48 | 0.46 | 0.42 | 2555.51 |
| 2016 | Canada | Elora | 590 | 260 | 2 | 9  | 0.66 | 0.59 | 0.54 | 0.48 | 0.46 | 2765.17 |
| 2016 | Canada | Elora | 591 | 213 | 2 | 9  | 0.66 | 0.63 | 0.53 | 0.47 | 0.38 | 3246.17 |
| 2016 | Canada | Elora | 592 | 16  | 2 | 9  | 0.73 | 0.69 | 0.59 | 0.58 | 0.57 | 1858.82 |
| 2016 | Canada | Elora | 593 | 176 | 2 | 9  | 0.61 | 0.58 | 0.49 | 0.47 | 0.45 | 3829.35 |
| 2016 | Canada | Elora | 594 | 201 | 2 | 9  | 0.64 | 0.57 | 0.49 | 0.41 | 0.31 | 3736.82 |
| 2016 | Canada | Elora | 595 | 270 | 2 | 9  | 0.7  | 0.65 | 0.54 | 0.51 | 0.43 | 3243.99 |
| 2016 | Canada | Elora | 596 | 3   | 2 | 9  | 0.76 | 0.69 | 0.57 | 0.56 | 0.45 | 3025.30 |
| 2016 | Canada | Elora | 597 | 208 | 2 | 9  | 0.72 | 0.66 | 0.55 | 0.5  | 0.46 | 3114.08 |
| 2016 | Canada | Elora | 598 | 55  | 2 | 9  | 0.72 | 0.62 | 0.51 | 0.43 | 0.41 | 2460.19 |
| 2016 | Canada | Elora | 599 | 275 | 2 | 9  | 0.73 | 0.66 | 0.55 | 0.5  | 0.42 | 4070.78 |
| 2016 | Canada | Elora | 600 | 281 | 2 | 9  | 0.66 | 0.61 | 0.55 | 0.5  | 0.47 | 3385.73 |
| 2016 | Canada | Elora | 601 | 85  | 2 | 9  | 0.73 | 0.67 | 0.57 | 0.53 | 0.54 | 2277.63 |
| 2016 | Canada | Elora | 602 | 233 | 2 | 9  | 0.72 | 0.65 | 0.53 | 0.47 | 0.46 | 3788.54 |
| 2016 | Canada | Elora | 603 | 73  | 2 | 9  | 0.71 | 0.65 | 0.6  | 0.48 | 0.4  | 3195.70 |
| 2016 | Canada | Elora | 604 | 183 | 2 | 9  | 0.68 | 0.68 | 0.54 | 0.47 | 0.32 | 3035.58 |
| 2016 | Canada | Elora | 605 | 160 | 2 | 9  | 0.75 | 0.61 | 0.53 | 0.56 | 0.44 | 1828.10 |
| 2016 | Canada | Elora | 606 | 317 | 2 | 9  | 0.59 | 0.56 | 0.48 | 0.6  | 0.56 | 1940.87 |
| 2016 | Canada | Elora | 607 | 42  | 2 | 9  | 0.64 | 0.57 | 0.54 | 0.6  | 0.51 | 1553.96 |
| 2016 | Canada | Elora | 608 | 157 | 2 | 9  | 0.62 | 0.6  | 0.51 | 0.59 | 0.5  | 1984.80 |
| 2016 | Canada | Elora | 609 | 310 | 2 | 10 | 0.69 | 0.62 | 0.51 | 0.43 | 0.47 | 3715.62 |
| 2016 | Canada | Elora | 610 | 144 | 2 | 10 | 0.7  | 0.61 | 0.57 | 0.5  | 0.48 | 2427.79 |
| 2016 | Canada | Elora | 611 | 188 | 2 | 10 | 0.68 | 0.66 | 0.59 | 0.56 | 0.51 | 3311.15 |
| 2016 | Canada | Elora | 612 | 249 | 2 | 10 | 0.72 | 0.66 | 0.57 | 0.59 | 0.62 | 3147.10 |
| 2016 | Canada | Elora | 613 | 284 | 2 | 10 | 0.68 | 0.64 | 0.5  | 0.46 | 0.46 | 2123.93 |
| 2016 | Canada | Elora | 614 | 308 | 2 | 10 | 0.7  | 0.65 | 0.56 | 0.55 | 0.55 | 2620.62 |
| 2016 | Canada | Elora | 615 | 315 | 2 | 10 | 0.68 | 0.62 | 0.52 | 0.51 | 0.42 | 2955.23 |
| 2016 | Canada | Elora | 616 | 276 | 2 | 10 | 0.68 | 0.64 | 0.59 | 0.58 | 0.46 | 4119.88 |

|      |        |       |     |     |   |    |      |      |      |      |      |      |         |
|------|--------|-------|-----|-----|---|----|------|------|------|------|------|------|---------|
| 2016 | Canada | Elora | 617 | 125 | 2 | 10 | 0.71 | 0.67 | 0.56 | 0.51 | 0.45 |      | 3047.73 |
| 2016 | Canada | Elora | 618 | 112 | 2 | 10 | 0.69 | 0.59 | 0.45 | 0.42 | 0.32 |      | 2435.26 |
| 2016 | Canada | Elora | 619 | 311 | 2 | 10 | 0.7  | 0.6  | 0.54 | 0.5  | 0.45 |      | 2732.77 |
| 2016 | Canada | Elora | 620 | 94  | 2 | 10 | 0.76 | 0.68 | 0.55 | 0.58 | 0.6  |      | 1451.62 |
| 2016 | Canada | Elora | 621 | 28  | 2 | 10 | 0.71 | 0.58 | 0.43 | 0.43 | 0.37 |      | 2576.67 |
| 2016 | Canada | Elora | 622 | 128 | 2 | 10 | 0.76 | 0.66 | 0.56 | 0.51 | 0.5  |      | 1765.76 |
| 2016 | Canada | Elora | 623 | 64  | 2 | 10 | 0.66 | 0.54 | 0.42 | 0.36 | 0.31 |      | 2716.76 |
| 2016 | Canada | Elora | 624 | 283 | 2 | 10 | 0.72 | 0.65 | 0.51 | 0.49 | 0.4  |      | 2595.70 |
| 2016 | Canada | Elora | 625 | 191 | 2 | 10 | 0.68 | 0.66 | 0.55 | 0.46 | 0.32 |      | 3978.26 |
| 2016 | Canada | Elora | 626 | 167 | 2 | 10 | 0.72 | 0.61 | 0.54 | 0.46 | 0.34 |      | 3226.85 |
| 2016 | Canada | Elora | 627 | 248 | 2 | 10 | 0.74 | 0.64 | 0.55 | 0.5  | 0.43 |      | 3324.67 |
| 2016 | Canada | Elora | 628 | 202 | 2 | 10 | 0.69 | 0.64 | 0.56 | 0.53 | 0.43 |      | 2840.09 |
| 2016 | Canada | Elora | 629 | 41  | 2 | 10 | 0.73 | 0.67 | 0.57 | 0.57 | 0.5  |      | 2263.61 |
| 2016 | Canada | Elora | 630 | 227 | 2 | 10 | 0.69 | 0.6  | 0.48 | 0.43 | 0.37 |      | 3193.52 |
| 2016 | Canada | Elora | 631 | 99  | 2 | 10 | 0.74 | 0.68 | 0.54 | 0.47 | 0.49 |      | 1877.32 |
| 2016 | Canada | Elora | 632 | 209 | 2 | 10 | 0.64 | 0.57 | 0.47 | 0.41 | 0.42 |      | 3428.72 |
| 2016 | Canada | Elora | 633 | 109 | 2 | 10 | 0.72 | 0.64 | 0.5  | 0.48 | 0.45 |      | 2100.37 |
| 2016 | Canada | Elora | 634 | 182 | 2 | 10 | 0.71 | 0.63 | 0.54 | 0.48 | 0.41 |      | 3379.81 |
| 2016 | Canada | Elora | 635 | 45  | 2 | 10 | 0.68 | 0.63 | 0.56 | 0.5  | 0.45 |      | 2514.39 |
| 2016 | Canada | Elora | 636 | 303 | 2 | 10 | 0.66 | 0.56 | 0.49 | 0.41 | 0.33 |      | 2713.77 |
| 2016 | Canada | Elora | 637 | 51  | 2 | 10 | 0.74 | 0.66 | 0.56 | 0.58 | 0.44 |      | 2317.20 |
| 2016 | Canada | Elora | 638 | 242 | 2 | 10 | 0.52 | 0.46 | 0.4  | 0.55 | 0.59 |      | 1429.97 |
| 2016 | Canada | Elora | 639 | 273 | 2 | 10 | 0.63 | 0.5  | 0.47 | 0.52 | 0.52 |      | 1935.89 |
| 2016 | Canada | Elora | 640 | 150 | 2 | 10 | 0.63 | 0.54 | 0.48 | 0.55 | 0.52 |      | 2083.55 |
| 2017 | Canada | Elora | 641 | 49  | 1 | 1  | 0.7  | 0.68 | 0.67 | 0.6  | 0.42 | 0.45 | 1909.26 |
| 2017 | Canada | Elora | 642 | 161 | 1 | 1  | 0.69 | 0.64 | 0.61 | 0.57 | 0.37 | 0.54 | 1318.41 |
| 2017 | Canada | Elora | 643 | 15  | 1 | 1  | 0.73 | 0.7  | 0.57 | 0.6  | 0.3  | 0.52 | 1065.01 |
| 2017 | Canada | Elora | 644 | 251 | 1 | 1  | 0.63 | 0.68 | 0.67 | 0.61 | 0.36 | 0.47 | 3356.81 |
| 2017 | Canada | Elora | 645 | 278 | 1 | 1  | 0.65 | 0.68 | 0.68 | 0.63 | 0.37 | 0.46 | 3608.81 |
| 2017 | Canada | Elora | 646 | 30  | 1 | 1  | 0.64 | 0.63 | 0.62 | 0.54 | 0.34 | 0.50 | 2147.21 |
| 2017 | Canada | Elora | 647 | 257 | 1 | 1  | 0.68 | 0.69 | 0.69 | 0.67 | 0.42 | 0.47 | 5297.26 |
| 2017 | Canada | Elora | 648 | 21  | 1 | 1  | 0.67 | 0.63 | 0.62 | 0.57 | 0.38 | 0.48 | 2292.02 |
| 2017 | Canada | Elora | 649 | 191 | 1 | 1  | 0.63 | 0.66 | 0.6  | 0.59 | 0.28 | 0.47 | 2824.81 |

|      |        |       |     |     |   |   |      |      |      |      |      |      |         |
|------|--------|-------|-----|-----|---|---|------|------|------|------|------|------|---------|
| 2017 | Canada | Elora | 650 | 227 | 1 | 1 | 0.68 | 0.69 | 0.65 | 0.61 | 0.34 | 0.48 | 3928.01 |
| 2017 | Canada | Elora | 651 | 263 | 1 | 1 | 0.7  | 0.7  | 0.69 | 0.64 | 0.36 | 0.51 | 2766.06 |
| 2017 | Canada | Elora | 652 | 171 | 1 | 1 | 0.68 | 0.67 | 0.65 | 0.52 | 0.3  | 0.46 | 2673.61 |
| 2017 | Canada | Elora | 653 | 169 | 1 | 1 | 0.72 | 0.69 | 0.6  | 0.52 | 0.24 | 0.50 | 988.01  |
| 2017 | Canada | Elora | 654 | 265 | 1 | 1 | 0.64 | 0.61 | 0.6  | 0.52 | 0.27 | 0.51 | 2771.66 |
| 2017 | Canada | Elora | 655 | 283 | 1 | 1 | 0.72 | 0.71 | 0.69 | 0.53 | 0.26 | 0.45 | 1951.21 |
| 2017 | Canada | Elora | 656 | 218 | 1 | 1 | 0.71 | 0.67 | 0.62 | 0.52 | 0.26 | 0.52 | 2253.61 |
| 2017 | Canada | Elora | 657 | 62  | 1 | 1 | 0.67 | 0.64 | 0.58 | 0.47 | 0.28 | 0.49 | 954.41  |
| 2017 | Canada | Elora | 658 | 14  | 1 | 1 | 0.69 | 0.63 | 0.52 | 0.39 | 0.27 | 0.50 | 338.41  |
| 2017 | Canada | Elora | 659 | 108 | 1 | 1 | 0.67 | 0.65 | 0.5  | 0.45 | 0.21 | 0.52 | 954.41  |
| 2017 | Canada | Elora | 660 | 303 | 1 | 1 | 0.67 | 0.65 | 0.53 | 0.45 | 0.23 | 0.52 | 1629.26 |
| 2017 | Canada | Elora | 661 | 304 | 1 | 2 | 0.71 | 0.68 | 0.68 | 0.52 | 0.35 | 0.54 | 2830.41 |
| 2017 | Canada | Elora | 662 | 119 | 1 | 2 | 0.64 | 0.62 | 0.53 | 0.53 | 0.32 | 0.53 | 1786.06 |
| 2017 | Canada | Elora | 663 | 293 | 1 | 2 | 0.72 | 0.71 | 0.65 | 0.59 | 0.39 | 0.57 | 1139.21 |
| 2017 | Canada | Elora | 664 | 308 | 1 | 2 | 0.71 | 0.72 | 0.66 | 0.6  | 0.34 | 0.51 | 1934.41 |
| 2017 | Canada | Elora | 665 | 76  | 1 | 2 | 0.71 | 0.7  | 0.62 | 0.52 | 0.26 | 0.52 | 3737.61 |
| 2017 | Canada | Elora | 666 | 55  | 1 | 2 | 0.69 | 0.68 | 0.63 | 0.55 | 0.22 | 0.52 | 1542.41 |
| 2017 | Canada | Elora | 667 | 307 | 1 | 2 | 0.74 | 0.73 | 0.71 | 0.5  | 0.29 | 0.47 | 1284.81 |
| 2017 | Canada | Elora | 668 | 95  | 1 | 2 | 0.63 | 0.58 | 0.56 | 0.53 | 0.27 | 0.51 | 2298.41 |
| 2017 | Canada | Elora | 669 | 187 | 1 | 2 | 0.66 | 0.65 | 0.59 | 0.54 | 0.22 | 0.49 | 2696.01 |
| 2017 | Canada | Elora | 670 | 300 | 1 | 2 | 0.72 | 0.73 | 0.69 | 0.57 | 0.27 | 0.51 | 2091.21 |
| 2017 | Canada | Elora | 671 | 311 | 1 | 2 | 0.72 | 0.68 | 0.61 | 0.54 | 0.3  | 0.50 | 3127.21 |
| 2017 | Canada | Elora | 672 | 9   | 1 | 2 | 0.74 | 0.72 | 0.64 | 0.51 | 0.29 | 0.50 | 3088.01 |
| 2017 | Canada | Elora | 673 | 176 | 1 | 2 | 0.7  | 0.71 | 0.68 | 0.64 | 0.27 | 0.45 | 724.81  |
| 2017 | Canada | Elora | 674 | 3   | 1 | 2 | 0.69 | 0.67 | 0.59 | 0.56 | 0.28 | 0.54 | 2441.26 |
| 2017 | Canada | Elora | 675 | 32  | 1 | 2 | 0.64 | 0.65 | 0.55 | 0.44 | 0.29 | 0.51 | 1548.01 |
| 2017 | Canada | Elora | 677 | 256 | 1 | 2 | 0.64 | 0.67 | 0.69 | 0.6  | 0.26 | 0.51 | 2768.81 |
| 2017 | Canada | Elora | 678 | 243 | 1 | 2 | 0.7  | 0.69 | 0.7  | 0.59 | 0.35 | 0.51 | 3720.81 |
| 2017 | Canada | Elora | 679 | 318 | 1 | 2 | 0.74 | 0.77 | 0.78 | 0.72 | 0.5  | 0.51 | 2612.01 |
| 2017 | Canada | Elora | 680 | 2   | 1 | 2 | 0.75 | 0.76 | 0.68 | 0.56 | 0.31 | 0.50 | 5238.41 |
| 2017 | Canada | Elora | 681 | 59  | 1 | 3 | 0.6  | 0.64 | 0.56 | 0.46 | 0.26 | 0.45 | 422.41  |
| 2017 | Canada | Elora | 682 | 113 | 1 | 3 | 0.64 | 0.64 | 0.52 | 0.46 | 0.24 | 0.49 | 960.01  |
| 2017 | Canada | Elora | 683 | 149 | 1 | 3 | 0.49 | 0.55 | 0.43 | 0.46 | 0.34 | 0.48 | 478.41  |

|      |        |       |     |     |   |   |      |      |      |      |      |      |         |
|------|--------|-------|-----|-----|---|---|------|------|------|------|------|------|---------|
| 2017 | Canada | Elora | 684 | 255 | 1 | 3 | 0.6  | 0.61 | 0.65 | 0.59 | 0.29 | 0.43 | 1489.26 |
| 2017 | Canada | Elora | 685 | 46  | 1 | 3 | 0.63 | 0.6  | 0.66 | 0.54 | 0.52 | 0.41 | 2679.21 |
| 2017 | Canada | Elora | 686 | 78  | 1 | 3 | 0.62 | 0.65 | 0.59 | 0.45 | 0.32 | 0.47 | 2292.81 |
| 2017 | Canada | Elora | 687 | 163 | 1 | 3 | 0.53 | 0.68 | 0.62 | 0.56 | 0.39 | 0.47 | 1573.26 |
| 2017 | Canada | Elora | 688 | 124 | 1 | 3 | 0.68 | 0.69 | 0.62 | 0.48 | 0.27 | 0.49 | 2007.21 |
| 2017 | Canada | Elora | 689 | 238 | 1 | 3 | 0.56 | 0.66 | 0.6  | 0.51 | 0.3  | 0.44 | 1674.06 |
| 2017 | Canada | Elora | 690 | 194 | 1 | 3 | 0.56 | 0.66 | 0.64 | 0.56 | 0.31 | 0.46 | 2701.61 |
| 2017 | Canada | Elora | 691 | 67  | 1 | 3 | 0.57 | 0.66 | 0.63 | 0.55 | 0.28 | 0.49 | 3015.21 |
| 2017 | Canada | Elora | 692 | 286 | 1 | 3 | 0.65 | 0.69 | 0.64 | 0.56 | 0.3  | 0.45 | 2152.81 |
| 2017 | Canada | Elora | 693 | 83  | 1 | 3 | 0.62 | 0.6  | 0.59 | 0.56 | 0.33 | 0.51 | 2500.01 |
| 2017 | Canada | Elora | 694 | 319 | 1 | 3 | 0.61 | 0.66 | 0.61 | 0.57 | 0.28 | 0.49 | 1570.41 |
| 2017 | Canada | Elora | 695 | 158 | 1 | 3 | 0.62 | 0.61 | 0.62 | 0.5  | 0.31 | 0.38 | 2892.01 |
| 2017 | Canada | Elora | 696 | 29  | 1 | 3 | 0.6  | 0.6  | 0.57 | 0.49 | 0.3  | 0.45 | 1301.61 |
| 2017 | Canada | Elora | 697 | 190 | 1 | 3 | 0.63 | 0.66 | 0.7  | 0.55 | 0.27 | 0.45 | 730.41  |
| 2017 | Canada | Elora | 698 | 221 | 1 | 3 | 0.6  | 0.68 | 0.55 | 0.52 | 0.32 | 0.46 | 1363.21 |
| 2017 | Canada | Elora | 699 | 295 | 1 | 3 | 0.69 | 0.7  | 0.68 | 0.55 | 0.38 | 0.46 | 3261.61 |
| 2017 | Canada | Elora | 700 | 66  | 1 | 3 | 0.66 | 0.64 | 0.58 | 0.55 | 0.34 | 0.43 | 2214.41 |
| 2017 | Canada | Elora | 701 | 19  | 1 | 4 | 0.67 | 0.62 | 0.59 | 0.47 | 0.32 | 0.42 | 3138.41 |
| 2017 | Canada | Elora | 702 | 7   | 1 | 4 | 0.65 | 0.6  | 0.48 | 0.48 | 0.3  | 0.51 | 1623.66 |
| 2017 | Canada | Elora | 703 | 276 | 1 | 4 | 0.58 | 0.61 | 0.6  | 0.58 | 0.32 | 0.46 | 1805.61 |
| 2017 | Canada | Elora | 704 | 245 | 1 | 4 | 0.64 | 0.62 | 0.58 | 0.58 | 0.31 | 0.49 | 1209.26 |
| 2017 | Canada | Elora | 705 | 127 | 1 | 4 | 0.64 | 0.63 | 0.46 | 0.47 | 0.25 | 0.50 | 2718.41 |
| 2017 | Canada | Elora | 706 | 64  | 1 | 4 | 0.57 | 0.61 | 0.63 | 0.57 | 0.35 | 0.43 | 3054.41 |
| 2017 | Canada | Elora | 707 | 310 | 1 | 4 | 0.62 | 0.68 | 0.55 | 0.61 | 0.35 | 0.45 | 512.01  |
| 2017 | Canada | Elora | 708 | 84  | 1 | 4 | 0.61 | 0.63 | 0.64 | 0.51 | 0.34 | 0.45 | 2808.01 |
| 2017 | Canada | Elora | 709 | 192 | 1 | 4 | 0.58 | 0.66 | 0.58 | 0.56 | 0.27 | 0.47 | 2679.21 |
| 2017 | Canada | Elora | 710 | 140 | 1 | 4 | 0.61 | 0.59 | 0.6  | 0.52 | 0.33 | 0.46 | 2903.21 |
| 2017 | Canada | Elora | 711 | 110 | 1 | 4 | 0.65 | 0.61 | 0.54 | 0.45 | 0.26 | 0.48 | 2936.81 |
| 2017 | Canada | Elora | 712 | 261 | 1 | 4 | 0.67 | 0.61 | 0.57 | 0.56 | 0.27 | 0.47 | 3407.21 |
| 2017 | Canada | Elora | 713 | 287 | 1 | 4 | 0.71 | 0.7  | 0.55 | 0.55 | 0.24 | 0.47 | 736.01  |
| 2017 | Canada | Elora | 714 | 273 | 1 | 4 | 0.65 | 0.66 | 0.63 | 0.55 | 0.2  | 0.45 | 1422.06 |
| 2017 | Canada | Elora | 715 | 212 | 1 | 4 | 0.67 | 0.66 | 0.52 | 0.56 | 0.23 | 0.49 | 2852.81 |
| 2017 | Canada | Elora | 716 | 181 | 1 | 4 | 0.62 | 0.58 | 0.64 | 0.54 | 0.27 | 0.45 | 2259.21 |

|      |        |       |     |     |   |   |      |      |      |      |      |      |         |
|------|--------|-------|-----|-----|---|---|------|------|------|------|------|------|---------|
| 2017 | Canada | Elora | 717 | 45  | 1 | 4 | 0.62 | 0.61 | 0.57 | 0.52 | 0.33 | 0.45 | 4090.41 |
| 2017 | Canada | Elora | 718 | 166 | 1 | 4 | 0.6  | 0.61 | 0.53 | 0.54 | 0.3  | 0.46 | 1822.41 |
| 2017 | Canada | Elora | 719 | 197 | 1 | 4 | 0.62 | 0.65 | 0.63 | 0.6  | 0.31 | 0.44 | 1783.21 |
| 2017 | Canada | Elora | 720 | 81  | 1 | 4 | 0.56 | 0.54 | 0.58 | 0.46 | 0.34 | 0.45 | 1128.01 |
| 2017 | Canada | Elora | 721 | 118 | 1 | 5 | 0.59 | 0.56 | 0.55 | 0.46 | 0.32 | 0.52 | 3244.81 |
| 2017 | Canada | Elora | 722 | 6   | 1 | 5 | 0.58 | 0.64 | 0.5  | 0.38 | 0.29 | 0.43 | 3720.81 |
| 2017 | Canada | Elora | 723 | 68  | 1 | 5 | 0.6  | 0.68 | 0.69 | 0.6  | 0.41 | 0.44 | 1965.26 |
| 2017 | Canada | Elora | 724 | 47  | 1 | 5 | 0.66 | 0.67 | 0.63 | 0.59 | 0.37 | 0.49 | 573.61  |
| 2017 | Canada | Elora | 725 | 56  | 1 | 5 | 0.65 | 0.64 | 0.54 | 0.52 | 0.29 | 0.50 | 2354.41 |
| 2017 | Canada | Elora | 726 | 151 | 1 | 5 | 0.59 | 0.5  | 0.53 | 0.56 | 0.27 | 0.48 | 1189.61 |
| 2017 | Canada | Elora | 727 | 249 | 1 | 5 | 0.63 | 0.65 | 0.63 | 0.58 | 0.37 | 0.49 | 887.21  |
| 2017 | Canada | Elora | 728 | 28  | 1 | 5 | 0.49 | 0.54 | 0.51 | 0.45 | 0.28 | 0.44 | 1464.01 |
| 2017 | Canada | Elora | 729 | 260 | 1 | 5 | 0.57 | 0.62 | 0.59 | 0.47 | 0.27 | 0.48 | 4490.86 |
| 2017 | Canada | Elora | 730 | 72  | 1 | 5 | 0.56 | 0.56 | 0.51 | 0.42 | 0.29 | 0.47 | 2494.41 |
| 2017 | Canada | Elora | 731 | 44  | 1 | 5 | 0.61 | 0.64 | 0.57 | 0.49 | 0.33 | 0.47 | 2880.81 |
| 2017 | Canada | Elora | 732 | 320 | 1 | 5 | 0.59 | 0.6  | 0.6  | 0.54 | 0.32 | 0.45 | 1528.46 |
| 2017 | Canada | Elora | 733 | 211 | 1 | 5 | 0.66 | 0.61 | 0.69 | 0.58 | 0.36 | 0.49 | 663.21  |
| 2017 | Canada | Elora | 734 | 105 | 1 | 5 | 0.68 | 0.71 | 0.68 | 0.56 | 0.33 | 0.46 | 2791.21 |
| 2017 | Canada | Elora | 735 | 247 | 1 | 5 | 0.67 | 0.59 | 0.67 | 0.53 | 0.3  | 0.44 | 1615.21 |
| 2017 | Canada | Elora | 736 | 157 | 1 | 5 | 0.69 | 0.73 | 0.64 | 0.49 | 0.24 | 0.47 | 2752.01 |
| 2017 | Canada | Elora | 737 | 172 | 1 | 5 | 0.67 | 0.71 | 0.65 | 0.56 | 0.3  | 0.48 | 2813.61 |
| 2017 | Canada | Elora | 738 | 156 | 1 | 5 | 0.65 | 0.68 | 0.59 | 0.51 | 0.28 | 0.48 | 741.61  |
| 2017 | Canada | Elora | 739 | 193 | 1 | 5 | 0.68 | 0.69 | 0.64 | 0.56 | 0.28 | 0.48 | 937.61  |
| 2017 | Canada | Elora | 740 | 134 | 1 | 5 | 0.68 | 0.71 | 0.68 | 0.58 | 0.32 | 0.47 | 792.01  |
| 2017 | Canada | Elora | 741 | 100 | 1 | 6 | 0.69 | 0.55 | 0.61 | 0.5  | 0.32 | 0.52 | 2824.81 |
| 2017 | Canada | Elora | 742 | 103 | 1 | 6 | 0.7  | 0.62 | 0.52 | 0.47 | 0.29 | 0.57 | 2547.66 |
| 2017 | Canada | Elora | 743 | 139 | 1 | 6 | 0.62 | 0.63 | 0.54 | 0.47 | 0.3  | 0.57 | 1984.81 |
| 2017 | Canada | Elora | 744 | 309 | 1 | 6 | 0.71 | 0.64 | 0.62 | 0.5  | 0.37 | 0.55 | 1097.26 |
| 2017 | Canada | Elora | 745 | 144 | 1 | 6 | 0.66 | 0.58 | 0.6  | 0.54 | 0.36 | 0.53 | 1307.21 |
| 2017 | Canada | Elora | 746 | 117 | 1 | 6 | 0.69 | 0.67 | 0.63 | 0.55 | 0.36 | 0.56 | 2348.81 |
| 2017 | Canada | Elora | 747 | 244 | 1 | 6 | 0.67 | 0.66 | 0.63 | 0.68 | 0.41 | 0.53 | 1363.21 |
| 2017 | Canada | Elora | 748 | 281 | 1 | 6 | 0.67 | 0.69 | 0.53 | 0.53 | 0.36 | 0.52 | 1856.01 |
| 2017 | Canada | Elora | 749 | 8   | 1 | 6 | 0.68 | 0.64 | 0.59 | 0.54 | 0.31 | 0.53 | 2399.21 |

|      |        |       |     |     |   |   |      |      |      |      |      |      |         |
|------|--------|-------|-----|-----|---|---|------|------|------|------|------|------|---------|
| 2017 | Canada | Elora | 750 | 180 | 1 | 6 | 0.63 | 0.57 | 0.58 | 0.51 | 0.23 | 0.49 | 1240.01 |
| 2017 | Canada | Elora | 751 | 232 | 1 | 6 | 0.66 | 0.7  | 0.65 | 0.58 | 0.29 | 0.53 | 1105.61 |
| 2017 | Canada | Elora | 752 | 208 | 1 | 6 | 0.65 | 0.68 | 0.66 | 0.52 | 0.3  | 0.51 | 2253.61 |
| 2017 | Canada | Elora | 753 | 253 | 1 | 6 | 0.7  | 0.72 | 0.66 | 0.59 | 0.32 | 0.53 | 1732.81 |
| 2017 | Canada | Elora | 754 | 146 | 1 | 6 | 0.61 | 0.61 | 0.56 | 0.47 | 0.29 | 0.53 | 3894.41 |
| 2017 | Canada | Elora | 755 | 128 | 1 | 6 | 0.66 | 0.61 | 0.57 | 0.4  | 0.28 | 0.51 | 1749.61 |
| 2017 | Canada | Elora | 756 | 132 | 1 | 6 | 0.69 | 0.7  | 0.54 | 0.47 | 0.21 | 0.54 | 1550.86 |
| 2017 | Canada | Elora | 757 | 248 | 1 | 6 | 0.65 | 0.67 | 0.69 | 0.65 | 0.32 | 0.50 | 400.01  |
| 2017 | Canada | Elora | 758 | 65  | 1 | 6 | 0.65 | 0.67 | 0.64 | 0.53 | 0.34 | 0.48 | 1214.86 |
| 2017 | Canada | Elora | 759 | 159 | 1 | 6 | 0.59 | 0.58 | 0.56 | 0.5  | 0.27 | 0.51 | 3048.81 |
| 2017 | Canada | Elora | 760 | 93  | 1 | 6 | 0.62 | 0.67 | 0.65 | 0.57 | 0.31 | 0.44 | 1464.01 |
| 2017 | Canada | Elora | 761 | 38  | 1 | 7 | 0.66 | 0.63 | 0.61 | 0.5  | 0.34 | 0.55 | 1576.01 |
| 2017 | Canada | Elora | 762 | 90  | 1 | 7 | 0.62 | 0.61 | 0.52 | 0.5  | 0.26 | 0.54 | 2404.81 |
| 2017 | Canada | Elora | 763 | 302 | 1 | 7 | 0.6  | 0.61 | 0.52 | 0.56 | 0.31 | 0.50 | 904.01  |
| 2017 | Canada | Elora | 764 | 292 | 1 | 7 | 0.65 | 0.67 | 0.64 | 0.59 | 0.29 | 0.53 | 1312.81 |
| 2017 | Canada | Elora | 765 | 10  | 1 | 7 | 0.6  | 0.68 | 0.69 | 0.64 | 0.35 | 0.51 | 2371.21 |
| 2017 | Canada | Elora | 766 | 85  | 1 | 7 | 0.68 | 0.72 | 0.63 | 0.56 | 0.36 | 0.53 | 3188.81 |
| 2017 | Canada | Elora | 767 | 23  | 1 | 7 | 0.67 | 0.69 | 0.62 | 0.55 | 0.36 | 0.47 | 2029.61 |
| 2017 | Canada | Elora | 768 | 122 | 1 | 7 | 0.7  | 0.72 | 0.65 | 0.53 | 0.31 | 0.48 | 1363.21 |
| 2017 | Canada | Elora | 769 | 40  | 1 | 7 | 0.72 | 0.67 | 0.54 | 0.49 | 0.39 | 0.51 | 1363.21 |
| 2017 | Canada | Elora | 770 | 107 | 1 | 7 | 0.67 | 0.69 | 0.6  | 0.52 | 0.18 | 0.53 | 926.41  |
| 2017 | Canada | Elora | 771 | 145 | 1 | 7 | 0.62 | 0.6  | 0.59 | 0.56 | 0.34 | 0.49 | 601.61  |
| 2017 | Canada | Elora | 772 | 279 | 1 | 7 | 0.56 | 0.58 | 0.58 | 0.49 | 0.33 | 0.49 | 1144.81 |
| 2017 | Canada | Elora | 773 | 262 | 1 | 7 | 0.67 | 0.7  | 0.68 | 0.64 | 0.39 | 0.54 | 1060.81 |
| 2017 | Canada | Elora | 774 | 299 | 1 | 7 | 0.57 | 0.62 | 0.59 | 0.55 | 0.24 | 0.49 | 1612.46 |
| 2017 | Canada | Elora | 775 | 34  | 1 | 7 | 0.64 | 0.64 | 0.57 | 0.48 | 0.34 | 0.48 | 2589.61 |
| 2017 | Canada | Elora | 776 | 210 | 1 | 7 | 0.73 | 0.72 | 0.65 | 0.59 | 0.4  | 0.51 | 3530.41 |
| 2017 | Canada | Elora | 777 | 297 | 1 | 7 | 0.67 | 0.69 | 0.69 | 0.6  | 0.32 | 0.47 | 3222.41 |
| 2017 | Canada | Elora | 778 | 250 | 1 | 7 | 0.61 | 0.64 | 0.62 | 0.58 | 0.36 | 0.53 | 680.01  |
| 2017 | Canada | Elora | 779 | 183 | 1 | 7 | 0.64 | 0.57 | 0.65 | 0.61 | 0.31 | 0.47 | 1520.01 |
| 2017 | Canada | Elora | 780 | 12  | 1 | 7 | 0.69 | 0.68 | 0.64 | 0.54 | 0.33 | 0.52 | 3463.21 |
| 2017 | Canada | Elora | 781 | 82  | 1 | 8 | 0.66 | 0.61 | 0.59 | 0.46 | 0.31 | 0.52 | 2628.81 |
| 2017 | Canada | Elora | 782 | 136 | 1 | 8 | 0.66 | 0.65 | 0.61 | 0.49 | 0.3  | 0.53 | 2544.81 |



|      |        |       |     |     |   |   |      |      |      |      |      |      |         |
|------|--------|-------|-----|-----|---|---|------|------|------|------|------|------|---------|
| 2017 | Canada | Elora | 783 | 147 | 1 | 8 | 0.63 | 0.67 | 0.62 | 0.5  | 0.32 | 0.52 | 713.61  |
| 2017 | Canada | Elora | 784 | 213 | 1 | 8 | 0.67 | 0.66 | 0.66 | 0.55 | 0.34 | 0.55 | 943.21  |
| 2017 | Canada | Elora | 785 | 51  | 1 | 8 | 0.64 | 0.65 | 0.63 | 0.53 | 0.28 | 0.51 | 1245.61 |
| 2017 | Canada | Elora | 786 | 204 | 1 | 8 | 0.69 | 0.68 | 0.65 | 0.55 | 0.33 | 0.53 | 1654.41 |
| 2017 | Canada | Elora | 787 | 290 | 1 | 8 | 0.74 | 0.75 | 0.72 | 0.64 | 0.34 | 0.49 | 1951.21 |
| 2017 | Canada | Elora | 788 | 254 | 1 | 8 | 0.67 | 0.65 | 0.67 | 0.57 | 0.33 | 0.51 | 1044.01 |
| 2017 | Canada | Elora | 789 | 101 | 1 | 8 | 0.67 | 0.69 | 0.68 | 0.61 | 0.3  | 0.48 | 909.61  |
| 2017 | Canada | Elora | 790 | 174 | 1 | 8 | 0.63 | 0.64 | 0.68 | 0.59 | 0.35 | 0.48 | 3614.41 |
| 2017 | Canada | Elora | 791 | 129 | 1 | 8 | 0.66 | 0.71 | 0.64 | 0.57 | 0.37 | 0.46 | 3239.21 |
| 2017 | Canada | Elora | 792 | 231 | 1 | 8 | 0.68 | 0.64 | 0.6  | 0.55 | 0.33 | 0.48 | 1783.21 |
| 2017 | Canada | Elora | 793 | 37  | 1 | 8 | 0.74 | 0.73 | 0.64 | 0.55 | 0.29 | 0.48 | 3160.81 |
| 2017 | Canada | Elora | 794 | 94  | 1 | 8 | 0.71 | 0.72 | 0.59 | 0.53 | 0.34 | 0.46 | 1884.01 |
| 2017 | Canada | Elora | 795 | 116 | 1 | 8 | 0.71 | 0.72 | 0.64 | 0.51 | 0.33 | 0.50 | 1279.21 |
| 2017 | Canada | Elora | 796 | 305 | 1 | 8 | 0.66 | 0.68 | 0.66 | 0.59 | 0.28 | 0.47 | 730.41  |
| 2017 | Canada | Elora | 797 | 173 | 1 | 8 | 0.71 | 0.69 | 0.65 | 0.6  | 0.39 | 0.45 | 996.46  |
| 2017 | Canada | Elora | 798 | 206 | 1 | 8 | 0.65 | 0.68 | 0.64 | 0.57 | 0.3  | 0.47 | 1298.86 |
| 2017 | Canada | Elora | 799 | 312 | 1 | 8 | 0.7  | 0.71 | 0.69 | 0.62 | 0.31 | 0.50 | 2914.41 |
| 2017 | Canada | Elora | 800 | 228 | 1 | 8 | 0.7  | 0.71 | 0.67 | 0.58 | 0.33 | 0.51 | 2393.61 |
| 2017 | Canada | Elora | 801 | 216 | 1 | 9 | 0.64 | 0.68 | 0.64 | 0.55 | 0.41 | 0.54 | 2668.01 |
| 2017 | Canada | Elora | 802 | 195 | 1 | 9 | 0.6  | 0.6  | 0.6  | 0.54 | 0.25 | 0.53 | 4020.46 |
| 2017 | Canada | Elora | 803 | 148 | 1 | 9 | 0.62 | 0.61 | 0.61 | 0.55 | 0.25 | 0.55 | 1536.81 |
| 2017 | Canada | Elora | 804 | 50  | 1 | 9 | 0.64 | 0.65 | 0.59 | 0.5  | 0.31 | 0.52 | 2432.81 |
| 2017 | Canada | Elora | 805 | 150 | 1 | 9 | 0.69 | 0.72 | 0.71 | 0.61 | 0.25 | 0.53 | 1665.61 |
| 2017 | Canada | Elora | 806 | 58  | 1 | 9 | 0.68 | 0.67 | 0.63 | 0.57 | 0.41 | 0.45 | 1139.21 |
| 2017 | Canada | Elora | 807 | 133 | 1 | 9 | 0.65 | 0.65 | 0.62 | 0.52 | 0.28 | 0.56 | 1273.61 |
| 2017 | Canada | Elora | 808 | 97  | 1 | 9 | 0.72 | 0.68 | 0.66 | 0.58 | 0.37 | 0.52 | 2113.61 |
| 2017 | Canada | Elora | 809 | 246 | 1 | 9 | 0.64 | 0.63 | 0.61 | 0.62 | 0.36 | 0.49 | 1172.81 |
| 2017 | Canada | Elora | 810 | 277 | 1 | 9 | 0.66 | 0.68 | 0.66 | 0.58 | 0.4  | 0.45 | 1357.61 |
| 2017 | Canada | Elora | 811 | 36  | 1 | 9 | 0.7  | 0.7  | 0.64 | 0.55 | 0.37 | 0.54 | 1934.41 |
| 2017 | Canada | Elora | 812 | 20  | 1 | 9 | 0.64 | 0.62 | 0.54 | 0.53 | 0.33 | 0.49 | 2595.21 |
| 2017 | Canada | Elora | 813 | 178 | 1 | 9 | 0.7  | 0.68 | 0.61 | 0.7  | 0.32 | 0.50 | 2382.41 |
| 2017 | Canada | Elora | 814 | 80  | 1 | 9 | 0.66 | 0.65 | 0.59 | 0.55 | 0.25 | 0.49 | 1027.21 |
| 2017 | Canada | Elora | 815 | 214 | 1 | 9 | 0.65 | 0.67 | 0.66 | 0.62 | 0.29 | 0.51 | 1416.46 |

|      |        |       |     |     |   |    |      |      |      |      |      |      |         |
|------|--------|-------|-----|-----|---|----|------|------|------|------|------|------|---------|
| 2017 | Canada | Elora | 816 | 89  | 1 | 9  | 0.67 | 0.75 | 0.69 | 0.59 | 0.42 | 0.47 | 1189.61 |
| 2017 | Canada | Elora | 817 | 143 | 1 | 9  | 0.66 | 0.68 | 0.68 | 0.55 | 0.38 | 0.50 | 1360.46 |
| 2017 | Canada | Elora | 818 | 168 | 1 | 9  | 0.69 | 0.67 | 0.72 | 0.68 | 0.44 | 0.49 | 2180.81 |
| 2017 | Canada | Elora | 819 | 240 | 1 | 9  | 0.7  | 0.68 | 0.69 | 0.62 | 0.34 | 0.53 | 1469.61 |
| 2017 | Canada | Elora | 820 | 153 | 1 | 9  | 0.7  | 0.74 | 0.64 | 0.62 | 0.32 | 0.50 | 2091.21 |
| 2017 | Canada | Elora | 821 | 233 | 1 | 10 | 0.66 | 0.64 | 0.59 | 0.56 | 0.33 | 0.57 | 1564.81 |
| 2017 | Canada | Elora | 822 | 141 | 1 | 10 | 0.62 | 0.64 | 0.63 | 0.53 | 0.25 | 0.54 | 2539.21 |
| 2017 | Canada | Elora | 823 | 106 | 1 | 10 | 0.58 | 0.54 | 0.53 | 0.5  | 0.24 | 0.53 | 2348.81 |
| 2017 | Canada | Elora | 824 | 259 | 1 | 10 | 0.61 | 0.59 | 0.54 | 0.5  | 0.28 | 0.59 | 2080.01 |
| 2017 | Canada | Elora | 825 | 186 | 1 | 10 | 0.65 | 0.63 | 0.61 | 0.48 | 0.23 | 0.49 | 1592.81 |
| 2017 | Canada | Elora | 826 | 235 | 1 | 10 | 0.57 | 0.6  | 0.55 | 0.56 | 0.25 | 0.57 | 909.61  |
| 2017 | Canada | Elora | 827 | 73  | 1 | 10 | 0.69 | 0.71 | 0.59 | 0.47 | 0.24 | 0.54 | 1973.61 |
| 2017 | Canada | Elora | 828 | 53  | 1 | 10 | 0.64 | 0.64 | 0.55 | 0.46 | 0.22 | 0.56 | 948.81  |
| 2017 | Canada | Elora | 829 | 274 | 1 | 10 | 0.75 | 0.72 | 0.54 | 0.6  | 0.32 | 0.48 | 2542.06 |
| 2017 | Canada | Elora | 830 | 69  | 1 | 10 | 0.62 | 0.63 | 0.56 | 0.54 | 0.28 | 0.53 | 954.41  |
| 2017 | Canada | Elora | 831 | 86  | 1 | 10 | 0.64 | 0.67 | 0.55 | 0.61 | 0.24 | 0.49 | 3127.21 |
| 2017 | Canada | Elora | 832 | 152 | 1 | 10 | 0.59 | 0.6  | 0.64 | 0.54 | 0.28 | 0.51 | 1755.21 |
| 2017 | Canada | Elora | 833 | 189 | 1 | 10 | 0.68 | 0.66 | 0.63 | 0.64 | 0.31 | 0.50 | 1436.01 |
| 2017 | Canada | Elora | 834 | 79  | 1 | 10 | 0.57 | 0.61 | 0.6  | 0.55 | 0.35 | 0.53 | 3206.73 |
| 2017 | Canada | Elora | 835 | 1   | 1 | 10 | 0.68 | 0.67 | 0.63 | 0.56 | 0.33 | 0.47 | 2236.81 |
| 2017 | Canada | Elora | 836 | 77  | 1 | 10 | 0.68 | 0.68 | 0.65 | 0.58 | 0.31 | 0.54 | 2656.81 |
| 2017 | Canada | Elora | 837 | 294 | 1 | 10 | 0.68 | 0.69 | 0.63 | 0.62 | 0.33 | 0.50 | 1805.61 |
| 2017 | Canada | Elora | 838 | 91  | 1 | 10 | 0.64 | 0.63 | 0.59 | 0.53 | 0.21 | 0.54 | 601.61  |
| 2017 | Canada | Elora | 839 | 185 | 1 | 10 | 0.66 | 0.7  | 0.69 | 0.69 | 0.31 | 0.49 | 909.61  |
| 2017 | Canada | Elora | 840 | 272 | 1 | 10 | 0.67 | 0.68 | 0.68 | 0.62 | 0.36 | 0.51 | 2668.01 |
| 2017 | Canada | Elora | 841 | 226 | 1 | 11 | 0.6  | 0.61 | 0.63 | 0.6  | 0.35 | 0.53 | 1548.01 |
| 2017 | Canada | Elora | 842 | 98  | 1 | 11 | 0.6  | 0.62 | 0.46 | 0.45 | 0.36 | 0.53 | 2502.86 |
| 2017 | Canada | Elora | 843 | 137 | 1 | 11 | 0.65 | 0.63 | 0.42 | 0.47 | 0.29 | 0.55 | 1615.21 |
| 2017 | Canada | Elora | 844 | 288 | 1 | 11 | 0.62 | 0.59 | 0.54 | 0.56 | 0.3  | 0.52 | 2192.01 |
| 2017 | Canada | Elora | 845 | 155 | 1 | 11 | 0.59 | 0.5  | 0.52 | 0.5  | 0.36 | 0.54 | 1531.21 |
| 2017 | Canada | Elora | 846 | 298 | 1 | 11 | 0.57 | 0.61 | 0.61 | 0.59 | 0.34 | 0.51 | 1066.41 |
| 2017 | Canada | Elora | 848 | 203 | 1 | 11 | 0.64 | 0.66 | 0.65 | 0.59 | 0.26 | 0.54 | 1413.61 |
| 2017 | Canada | Elora | 849 | 26  | 1 | 11 | 0.62 | 0.63 | 0.58 | 0.56 | 0.24 | 0.52 | 2035.21 |

|      |        |       |     |     |   |    |      |      |      |      |      |      |         |
|------|--------|-------|-----|-----|---|----|------|------|------|------|------|------|---------|
| 2017 | Canada | Elora | 850 | 224 | 1 | 11 | 0.62 | 0.65 | 0.63 | 0.54 | 0.28 | 0.53 | 1357.61 |
| 2017 | Canada | Elora | 851 | 114 | 1 | 11 | 0.65 | 0.57 | 0.7  | 0.63 | 0.43 | 0.54 | 1223.21 |
| 2017 | Canada | Elora | 852 | 314 | 1 | 11 | 0.67 | 0.6  | 0.61 | 0.59 | 0.28 | 0.47 | 1531.21 |
| 2017 | Canada | Elora | 853 | 222 | 1 | 11 | 0.62 | 0.57 | 0.66 | 0.6  | 0.3  | 0.53 | 2813.61 |
| 2017 | Canada | Elora | 854 | 112 | 1 | 11 | 0.58 | 0.62 | 0.51 | 0.51 | 0.24 | 0.54 | 1962.41 |
| 2017 | Canada | Elora | 855 | 219 | 1 | 11 | 0.63 | 0.64 | 0.64 | 0.57 | 0.37 | 0.47 | 2225.61 |
| 2017 | Canada | Elora | 856 | 225 | 1 | 11 | 0.72 | 0.67 | 0.57 | 0.46 | 0.33 | 0.51 | 2298.41 |
| 2017 | Canada | Elora | 857 | 31  | 1 | 11 | 0.7  | 0.73 | 0.73 | 0.65 | 0.36 | 0.55 | 1424.81 |
| 2017 | Canada | Elora | 858 | 4   | 1 | 11 | 0.57 | 0.64 | 0.53 | 0.51 | 0.27 | 0.54 | 2001.61 |
| 2017 | Canada | Elora | 859 | 170 | 1 | 11 | 0.57 | 0.67 | 0.58 | 0.52 | 0.31 | 0.55 | 1357.61 |
| 2017 | Canada | Elora | 860 | 18  | 1 | 11 | 0.57 | 0.63 | 0.64 | 0.57 | 0.28 | 0.52 | 1671.21 |
| 2017 | Canada | Elora | 861 | 258 | 1 | 12 | 0.61 | 0.61 | 0.65 | 0.56 | 0.34 | 0.45 | 948.81  |
| 2017 | Canada | Elora | 862 | 285 | 1 | 12 | 0.63 | 0.65 | 0.63 | 0.59 | 0.34 | 0.52 | 1727.21 |
| 2017 | Canada | Elora | 863 | 5   | 1 | 12 | 0.54 | 0.52 | 0.42 | 0.41 | 0.3  | 0.52 | 2096.81 |
| 2017 | Canada | Elora | 864 | 74  | 1 | 12 | 0.56 | 0.57 | 0.52 | 0.51 | 0.28 | 0.47 | 1542.41 |
| 2017 | Canada | Elora | 865 | 42  | 1 | 12 | 0.68 | 0.69 | 0.52 | 0.47 | 0.32 | 0.55 | 3317.61 |
| 2017 | Canada | Elora | 866 | 24  | 1 | 12 | 0.73 | 0.72 | 0.6  | 0.4  | 0.22 | 0.56 | 820.01  |
| 2017 | Canada | Elora | 867 | 135 | 1 | 12 | 0.71 | 0.69 | 0.61 | 0.58 | 0.31 | 0.56 | 428.01  |
| 2017 | Canada | Elora | 868 | 120 | 1 | 12 | 0.65 | 0.54 | 0.45 | 0.41 | 0.3  | 0.57 | 1402.41 |
| 2017 | Canada | Elora | 869 | 25  | 1 | 12 | 0.62 | 0.59 | 0.48 | 0.48 | 0.25 | 0.56 | 1517.26 |
| 2017 | Canada | Elora | 870 | 87  | 1 | 12 | 0.65 | 0.68 | 0.51 | 0.55 | 0.27 | 0.51 | 1301.61 |
| 2017 | Canada | Elora | 871 | 60  | 1 | 12 | 0.56 | 0.55 | 0.52 | 0.5  | 0.28 | 0.52 | 1217.61 |
| 2017 | Canada | Elora | 872 | 131 | 1 | 12 | 0.66 | 0.67 | 0.59 | 0.5  | 0.35 | 0.55 | 1578.86 |
| 2017 | Canada | Elora | 873 | 230 | 1 | 12 | 0.65 | 0.64 | 0.49 | 0.48 | 0.31 | 0.53 | 461.61  |
| 2017 | Canada | Elora | 874 | 200 | 1 | 12 | 0.6  | 0.61 | 0.59 | 0.54 | 0.32 | 0.48 | 3099.21 |
| 2017 | Canada | Elora | 875 | 237 | 1 | 12 | 0.63 | 0.62 | 0.6  | 0.54 | 0.32 | 0.50 | 3127.21 |
| 2017 | Canada | Elora | 876 | 142 | 1 | 12 | 0.56 | 0.6  | 0.57 | 0.49 | 0.23 | 0.48 | 2676.46 |
| 2017 | Canada | Elora | 877 | 241 | 1 | 12 | 0.62 | 0.58 | 0.58 | 0.54 | 0.35 | 0.49 | 2920.01 |
| 2017 | Canada | Elora | 878 | 284 | 1 | 12 | 0.62 | 0.54 | 0.48 | 0.49 | 0.28 | 0.48 | 2035.21 |
| 2017 | Canada | Elora | 879 | 179 | 1 | 12 | 0.63 | 0.63 | 0.62 | 0.56 | 0.29 | 0.53 | 3580.81 |
| 2017 | Canada | Elora | 880 | 220 | 1 | 12 | 0.62 | 0.61 | 0.6  | 0.52 | 0.27 | 0.54 | 1749.61 |
| 2017 | Canada | Elora | 881 | 306 | 1 | 13 | 0.66 | 0.6  | 0.63 | 0.62 | 0.31 | 0.47 | 2164.01 |
| 2017 | Canada | Elora | 882 | 317 | 1 | 13 | 0.66 | 0.63 | 0.53 | 0.45 | 0.28 | 0.52 | 1186.86 |

|      |        |       |     |     |   |    |      |      |      |      |      |      |         |
|------|--------|-------|-----|-----|---|----|------|------|------|------|------|------|---------|
| 2017 | Canada | Elora | 883 | 75  | 1 | 13 | 0.59 | 0.62 | 0.44 | 0.43 | 0.35 | 0.53 | 898.41  |
| 2017 | Canada | Elora | 884 | 109 | 1 | 13 | 0.61 | 0.65 | 0.58 | 0.51 | 0.32 | 0.54 | 1632.01 |
| 2017 | Canada | Elora | 885 | 271 | 1 | 13 | 0.64 | 0.61 | 0.64 | 0.63 | 0.38 | 0.49 | 2505.61 |
| 2017 | Canada | Elora | 886 | 315 | 1 | 13 | 0.69 | 0.66 | 0.65 | 0.52 | 0.29 | 0.54 | 2724.01 |
| 2017 | Canada | Elora | 887 | 41  | 1 | 13 | 0.64 | 0.58 | 0.43 | 0.49 | 0.26 | 0.54 | 792.01  |
| 2017 | Canada | Elora | 888 | 270 | 1 | 13 | 0.63 | 0.59 | 0.62 | 0.53 | 0.31 | 0.52 | 3020.81 |
| 2017 | Canada | Elora | 889 | 16  | 1 | 13 | 0.63 | 0.65 | 0.56 | 0.41 | 0.25 | 0.54 | 467.21  |
| 2017 | Canada | Elora | 890 | 282 | 1 | 13 | 0.68 | 0.69 | 0.5  | 0.48 | 0.33 | 0.54 | 444.81  |
| 2017 | Canada | Elora | 891 | 11  | 1 | 13 | 0.55 | 0.54 | 0.57 | 0.55 | 0.34 | 0.50 | 2589.61 |
| 2017 | Canada | Elora | 892 | 236 | 1 | 13 | 0.62 | 0.65 | 0.58 | 0.51 | 0.27 | 0.52 | 2074.41 |
| 2017 | Canada | Elora | 893 | 296 | 1 | 13 | 0.66 | 0.66 | 0.68 | 0.64 | 0.41 | 0.47 | 2914.41 |
| 2017 | Canada | Elora | 894 | 201 | 1 | 13 | 0.61 | 0.62 | 0.56 | 0.54 | 0.2  | 0.48 | 2248.01 |
| 2017 | Canada | Elora | 895 | 61  | 1 | 13 | 0.55 | 0.53 | 0.51 | 0.48 | 0.23 | 0.53 | 1060.81 |
| 2017 | Canada | Elora | 896 | 130 | 1 | 13 | 0.64 | 0.6  | 0.54 | 0.48 | 0.29 | 0.49 | 1542.41 |
| 2017 | Canada | Elora | 897 | 202 | 1 | 13 | 0.65 | 0.63 | 0.65 | 0.58 | 0.34 | 0.52 | 3250.41 |
| 2017 | Canada | Elora | 898 | 209 | 1 | 13 | 0.66 | 0.65 | 0.61 | 0.52 | 0.35 | 0.54 | 1962.41 |
| 2017 | Canada | Elora | 899 | 291 | 1 | 13 | 0.64 | 0.67 | 0.65 | 0.63 | 0.39 | 0.52 | 3334.41 |
| 2017 | Canada | Elora | 900 | 196 | 1 | 13 | 0.6  | 0.58 | 0.57 | 0.57 | 0.34 | 0.46 | 1923.21 |
| 2017 | Canada | Elora | 901 | 13  | 1 | 14 | 0.5  | 0.51 | 0.47 | 0.5  | 0.31 | 0.53 | 2399.21 |
| 2017 | Canada | Elora | 902 | 199 | 1 | 14 | 0.48 | 0.44 | 0.48 | 0.42 | 0.27 | 0.50 | 1301.61 |
| 2017 | Canada | Elora | 903 | 266 | 1 | 14 | 0.61 | 0.64 | 0.55 | 0.49 | 0.25 | 0.53 | 1968.01 |
| 2017 | Canada | Elora | 904 | 39  | 1 | 14 | 0.54 | 0.46 | 0.45 | 0.44 | 0.35 | 0.55 | 1548.01 |
| 2017 | Canada | Elora | 905 | 154 | 1 | 14 | 0.53 | 0.5  | 0.46 | 0.45 | 0.35 | 0.54 | 1352.01 |
| 2017 | Canada | Elora | 906 | 115 | 1 | 14 | 0.68 | 0.66 | 0.55 | 0.5  | 0.36 | 0.50 | 517.61  |
| 2017 | Canada | Elora | 907 | 313 | 1 | 14 | 0.6  | 0.66 | 0.56 | 0.49 | 0.29 | 0.54 | 1777.61 |
| 2017 | Canada | Elora | 908 | 269 | 1 | 14 | 0.57 | 0.56 | 0.5  | 0.43 | 0.23 | 0.50 | 3015.21 |
| 2017 | Canada | Elora | 909 | 177 | 1 | 14 | 0.55 | 0.59 | 0.51 | 0.5  | 0.41 | 0.49 | 2113.61 |
| 2017 | Canada | Elora | 910 | 121 | 1 | 14 | 0.57 | 0.55 | 0.52 | 0.51 | 0.29 | 0.55 | 1223.21 |
| 2017 | Canada | Elora | 911 | 22  | 1 | 14 | 0.67 | 0.64 | 0.56 | 0.55 | 0.38 | 0.57 | 1525.61 |
| 2017 | Canada | Elora | 912 | 205 | 1 | 14 | 0.6  | 0.6  | 0.58 | 0.51 | 0.25 | 0.56 | 3183.21 |
| 2017 | Canada | Elora | 913 | 43  | 1 | 14 | 0.65 | 0.62 | 0.58 | 0.51 | 0.38 | 0.53 | 915.21  |
| 2017 | Canada | Elora | 914 | 167 | 1 | 14 | 0.49 | 0.43 | 0.38 | 0.36 | 0.25 | 0.55 | 1458.41 |
| 2017 | Canada | Elora | 915 | 102 | 1 | 14 | 0.63 | 0.59 | 0.58 | 0.47 | 0.23 | 0.52 | 2455.21 |

|      |        |       |     |     |   |    |      |      |      |      |      |      |         |
|------|--------|-------|-----|-----|---|----|------|------|------|------|------|------|---------|
| 2017 | Canada | Elora | 916 | 70  | 1 | 14 | 0.59 | 0.56 | 0.49 | 0.39 | 0.26 | 0.56 | 1245.61 |
| 2017 | Canada | Elora | 917 | 198 | 1 | 14 | 0.63 | 0.61 | 0.63 | 0.61 | 0.39 | 0.44 | 2432.81 |
| 2017 | Canada | Elora | 918 | 33  | 1 | 14 | 0.53 | 0.47 | 0.42 | 0.46 | 0.3  | 0.55 | 976.81  |
| 2017 | Canada | Elora | 919 | 215 | 1 | 14 | 0.55 | 0.58 | 0.59 | 0.51 | 0.32 | 0.52 | 2819.21 |
| 2017 | Canada | Elora | 920 | 48  | 1 | 14 | 0.53 | 0.47 | 0.4  | 0.41 | 0.3  | 0.57 | 3709.61 |
| 2017 | Canada | Elora | 921 | 182 | 1 | 15 | 0.56 | 0.58 | 0.6  | 0.6  | 0.34 | 0.52 | 4292.01 |
| 2017 | Canada | Elora | 922 | 175 | 1 | 15 | 0.61 | 0.59 | 0.59 | 0.55 | 0.29 | 0.58 | 3804.81 |
| 2017 | Canada | Elora | 923 | 217 | 1 | 15 | 0.51 | 0.57 | 0.58 | 0.54 | 0.38 | 0.53 | 2245.26 |
| 2017 | Canada | Elora | 924 | 123 | 1 | 15 | 0.58 | 0.52 | 0.47 | 0.43 | 0.36 | 0.57 | 1329.61 |
| 2017 | Canada | Elora | 925 | 57  | 1 | 15 | 0.58 | 0.54 | 0.5  | 0.44 | 0.34 | 0.54 | 2141.61 |
| 2017 | Canada | Elora | 926 | 138 | 1 | 15 | 0.54 | 0.51 | 0.54 | 0.51 | 0.29 | 0.52 | 1195.21 |
| 2017 | Canada | Elora | 927 | 63  | 1 | 15 | 0.61 | 0.53 | 0.42 | 0.48 | 0.27 | 0.59 | 2970.41 |
| 2017 | Canada | Elora | 928 | 316 | 1 | 15 | 0.56 | 0.52 | 0.54 | 0.53 | 0.25 | 0.52 | 2245.26 |
| 2017 | Canada | Elora | 929 | 234 | 1 | 15 | 0.65 | 0.63 | 0.6  | 0.52 | 0.32 | 0.55 | 2245.26 |
| 2017 | Canada | Elora | 930 | 71  | 1 | 15 | 0.5  | 0.49 | 0.5  | 0.49 | 0.28 | 0.51 | 2897.61 |
| 2017 | Canada | Elora | 931 | 239 | 1 | 15 | 0.49 | 0.5  | 0.52 | 0.5  | 0.26 | 0.53 | 3866.41 |
| 2017 | Canada | Elora | 932 | 125 | 1 | 15 | 0.59 | 0.59 | 0.6  | 0.58 | 0.35 | 0.50 | 758.41  |
| 2017 | Canada | Elora | 933 | 111 | 1 | 15 | 0.69 | 0.7  | 0.53 | 0.52 | 0.27 | 0.57 | 3295.21 |
| 2017 | Canada | Elora | 934 | 275 | 1 | 15 | 0.54 | 0.54 | 0.52 | 0.54 | 0.33 | 0.56 | 6330.41 |
| 2017 | Canada | Elora | 935 | 207 | 1 | 15 | 0.61 | 0.63 | 0.64 | 0.59 | 0.34 | 0.53 | 3015.21 |
| 2017 | Canada | Elora | 936 | 242 | 1 | 15 | 0.55 | 0.6  | 0.58 | 0.55 | 0.38 | 0.57 | 2830.41 |
| 2017 | Canada | Elora | 937 | 52  | 1 | 15 | 0.53 | 0.59 | 0.55 | 0.52 | 0.37 | 0.49 | 3698.41 |
| 2017 | Canada | Elora | 938 | 223 | 1 | 15 | 0.59 | 0.57 | 0.51 | 0.49 | 0.29 | 0.56 | 2186.41 |
| 2017 | Canada | Elora | 939 | 165 | 1 | 15 | 0.71 | 0.7  | 0.64 | 0.59 | 0.37 | 0.60 | 999.21  |
| 2017 | Canada | Elora | 940 | 164 | 1 | 15 | 0.62 | 0.6  | 0.54 | 0.43 | 0.29 | 0.56 | 1310.06 |
| 2017 | Canada | Elora | 941 | 184 | 1 | 16 | 0.67 | 0.64 | 0.52 | 0.45 | 0.3  | 0.51 | 1508.81 |
| 2017 | Canada | Elora | 942 | 126 | 1 | 16 | 0.47 | 0.52 | 0.4  | 0.33 | 0.27 | 0.45 | 2354.41 |
| 2017 | Canada | Elora | 943 | 92  | 1 | 16 | 0.54 | 0.59 | 0.5  | 0.54 | 0.28 | 0.54 | 4045.61 |
| 2017 | Canada | Elora | 944 | 268 | 1 | 16 | 0.53 | 0.56 | 0.55 | 0.52 | 0.3  | 0.49 | 1923.21 |
| 2017 | Canada | Elora | 945 | 264 | 1 | 16 | 0.64 | 0.65 | 0.6  | 0.57 | 0.34 | 0.56 | 3474.41 |
| 2017 | Canada | Elora | 946 | 301 | 1 | 16 | 0.61 | 0.59 | 0.46 | 0.45 | 0.26 | 0.53 | 1917.61 |
| 2017 | Canada | Elora | 947 | 188 | 1 | 16 | 0.62 | 0.64 | 0.52 | 0.53 | 0.33 | 0.53 | 1637.61 |
| 2017 | Canada | Elora | 948 | 54  | 1 | 16 | 0.56 | 0.59 | 0.57 | 0.47 | 0.3  | 0.54 | 1861.61 |

|      |        |       |     |     |   |    |      |      |      |      |      |      |         |
|------|--------|-------|-----|-----|---|----|------|------|------|------|------|------|---------|
| 2017 | Canada | Elora | 949 | 88  | 1 | 16 | 0.61 | 0.64 | 0.56 | 0.52 | 0.37 | 0.54 | 3127.21 |
| 2017 | Canada | Elora | 950 | 280 | 1 | 16 | 0.57 | 0.6  | 0.54 | 0.46 | 0.24 | 0.47 | 3468.81 |
| 2017 | Canada | Elora | 951 | 104 | 1 | 16 | 0.63 | 0.65 | 0.59 | 0.52 | 0.32 | 0.50 | 1385.61 |
| 2017 | Canada | Elora | 952 | 160 | 1 | 16 | 0.61 | 0.59 | 0.58 | 0.56 | 0.28 | 0.48 | 4051.21 |
| 2017 | Canada | Elora | 953 | 289 | 1 | 16 | 0.5  | 0.61 | 0.48 | 0.47 | 0.27 | 0.54 | 1553.61 |
| 2017 | Canada | Elora | 954 | 252 | 1 | 16 | 0.56 | 0.59 | 0.5  | 0.53 | 0.3  | 0.50 | 2942.41 |
| 2017 | Canada | Elora | 955 | 35  | 1 | 16 | 0.5  | 0.6  | 0.56 | 0.52 | 0.28 | 0.49 | 2427.21 |
| 2017 | Canada | Elora | 956 | 99  | 1 | 16 | 0.66 | 0.58 | 0.54 | 0.5  | 0.22 | 0.54 | 1864.46 |
| 2017 | Canada | Elora | 957 | 229 | 1 | 16 | 0.7  | 0.69 | 0.55 | 0.42 | 0.3  | 0.52 | 500.81  |
| 2017 | Canada | Elora | 958 | 27  | 1 | 16 | 0.62 | 0.57 | 0.53 | 0.43 | 0.3  | 0.56 | 1651.66 |
| 2017 | Canada | Elora | 959 | 17  | 1 | 16 | 0.64 | 0.63 | 0.62 | 0.56 | 0.34 | 0.48 | 3295.21 |
| 2017 | Canada | Elora | 960 | 96  | 1 | 16 | 0.57 | 0.59 | 0.52 | 0.46 | 0.34 | 0.57 | 1287.66 |
| 2017 | Canada | Elora | 961 | 302 | 2 | 1  | 0.7  | 0.64 | 0.69 | 0.63 | 0.36 | 0.47 | 3306.41 |
| 2017 | Canada | Elora | 963 | 290 | 2 | 1  | 0.72 | 0.72 | 0.7  | 0.61 | 0.36 | 0.47 | 3978.41 |
| 2017 | Canada | Elora | 964 | 87  | 2 | 1  | 0.76 | 0.73 | 0.68 | 0.61 | 0.33 | 0.47 | 1833.61 |
| 2017 | Canada | Elora | 965 | 131 | 2 | 1  | 0.77 | 0.75 | 0.67 | 0.57 | 0.34 | 0.52 | 954.41  |
| 2017 | Canada | Elora | 966 | 106 | 2 | 1  | 0.71 | 0.66 | 0.65 | 0.57 | 0.3  | 0.48 | 1256.81 |
| 2017 | Canada | Elora | 967 | 111 | 2 | 1  | 0.78 | 0.72 | 0.59 | 0.44 | 0.24 | 0.52 | 467.21  |
| 2017 | Canada | Elora | 968 | 63  | 2 | 1  | 0.73 | 0.77 | 0.62 | 0.54 | 0.19 | 0.51 | 1130.86 |
| 2017 | Canada | Elora | 969 | 51  | 2 | 1  | 0.69 | 0.63 | 0.56 | 0.44 | 0.28 | 0.50 | 2292.81 |
| 2017 | Canada | Elora | 970 | 258 | 2 | 1  | 0.7  | 0.7  | 0.72 | 0.58 | 0.36 | 0.43 | 2259.21 |
| 2017 | Canada | Elora | 971 | 273 | 2 | 1  | 0.69 | 0.66 | 0.64 | 0.53 | 0.26 | 0.46 | 2376.81 |
| 2017 | Canada | Elora | 972 | 239 | 2 | 1  | 0.69 | 0.65 | 0.67 | 0.55 | 0.25 | 0.47 | 803.21  |
| 2017 | Canada | Elora | 973 | 88  | 2 | 1  | 0.72 | 0.74 | 0.68 | 0.59 | 0.37 | 0.48 | 2472.01 |
| 2017 | Canada | Elora | 974 | 224 | 2 | 1  | 0.71 | 0.69 | 0.67 | 0.61 | 0.29 | 0.47 | 691.21  |
| 2017 | Canada | Elora | 975 | 157 | 2 | 1  | 0.7  | 0.71 | 0.65 | 0.52 | 0.33 | 0.48 | 2609.26 |
| 2017 | Canada | Elora | 976 | 255 | 2 | 1  | 0.68 | 0.74 | 0.7  | 0.62 | 0.32 | 0.41 | 2704.46 |
| 2017 | Canada | Elora | 977 | 301 | 2 | 1  | 0.63 | 0.65 | 0.64 | 0.43 | 0.26 | 0.49 | 758.41  |
| 2017 | Canada | Elora | 978 | 61  | 2 | 1  | 0.67 | 0.64 | 0.58 | 0.45 | 0.25 | 0.46 | 1128.01 |
| 2017 | Canada | Elora | 979 | 144 | 2 | 1  | 0.65 | 0.65 | 0.54 | 0.52 | 0.32 | 0.44 | 870.41  |
| 2017 | Canada | Elora | 980 | 65  | 2 | 1  | 0.68 | 0.67 | 0.6  | 0.5  | 0.34 | 0.44 | 3440.81 |
| 2017 | Canada | Elora | 981 | 312 | 2 | 2  | 0.71 | 0.68 | 0.69 | 0.6  | 0.28 | 0.47 | 2651.21 |
| 2017 | Canada | Elora | 982 | 11  | 2 | 2  | 0.66 | 0.65 | 0.66 | 0.54 | 0.38 | 0.49 | 1184.01 |

|      |        |       |      |     |   |   |      |      |      |      |      |      |         |
|------|--------|-------|------|-----|---|---|------|------|------|------|------|------|---------|
| 2017 | Canada | Elora | 983  | 225 | 2 | 2 | 0.69 | 0.65 | 0.61 | 0.5  | 0.3  | 0.51 | 456.01  |
| 2017 | Canada | Elora | 984  | 127 | 2 | 2 | 0.71 | 0.7  | 0.57 | 0.47 | 0.24 | 0.56 | 2332.01 |
| 2017 | Canada | Elora | 985  | 228 | 2 | 2 | 0.68 | 0.67 | 0.64 | 0.54 | 0.32 | 0.53 | 1503.21 |
| 2017 | Canada | Elora | 986  | 121 | 2 | 2 | 0.71 | 0.67 | 0.6  | 0.53 | 0.27 | 0.52 | 1926.06 |
| 2017 | Canada | Elora | 987  | 83  | 2 | 2 | 0.65 | 0.6  | 0.61 | 0.51 | 0.3  | 0.52 | 1889.61 |
| 2017 | Canada | Elora | 988  | 263 | 2 | 2 | 0.68 | 0.7  | 0.71 | 0.6  | 0.27 | 0.51 | 2175.21 |
| 2017 | Canada | Elora | 989  | 236 | 2 | 2 | 0.71 | 0.71 | 0.68 | 0.55 | 0.26 | 0.53 | 2309.61 |
| 2017 | Canada | Elora | 990  | 192 | 2 | 2 | 0.71 | 0.75 | 0.68 | 0.56 | 0.24 | 0.54 | 1749.61 |
| 2017 | Canada | Elora | 991  | 118 | 2 | 2 | 0.7  | 0.64 | 0.61 | 0.49 | 0.26 | 0.54 | 1710.41 |
| 2017 | Canada | Elora | 992  | 221 | 2 | 2 | 0.69 | 0.69 | 0.63 | 0.58 | 0.22 | 0.49 | 881.61  |
| 2017 | Canada | Elora | 993  | 143 | 2 | 2 | 0.59 | 0.71 | 0.67 | 0.59 | 0.34 | 0.50 | 2606.41 |
| 2017 | Canada | Elora | 994  | 89  | 2 | 2 | 0.77 | 0.75 | 0.64 | 0.63 | 0.35 | 0.47 | 1486.41 |
| 2017 | Canada | Elora | 995  | 271 | 2 | 2 | 0.73 | 0.67 | 0.7  | 0.57 | 0.32 | 0.46 | 2388.01 |
| 2017 | Canada | Elora | 996  | 46  | 2 | 2 | 0.66 | 0.68 | 0.64 | 0.56 | 0.5  | 0.46 | 758.41  |
| 2017 | Canada | Elora | 997  | 300 | 2 | 2 | 0.7  | 0.71 | 0.67 | 0.6  | 0.35 | 0.48 | 2040.81 |
| 2017 | Canada | Elora | 998  | 103 | 2 | 2 | 0.68 | 0.65 | 0.57 | 0.49 | 0.23 | 0.49 | 1240.01 |
| 2017 | Canada | Elora | 999  | 283 | 2 | 2 | 0.72 | 0.67 | 0.66 | 0.52 | 0.29 | 0.44 | 2133.26 |
| 2017 | Canada | Elora | 1000 | 293 | 2 | 2 | 0.76 | 0.75 | 0.71 | 0.59 | 0.42 | 0.51 | 282.41  |
| 2017 | Canada | Elora | 1001 | 21  | 2 | 3 | 0.62 | 0.63 | 0.65 | 0.58 | 0.28 | 0.46 | 2169.61 |
| 2017 | Canada | Elora | 1002 | 229 | 2 | 3 | 0.68 | 0.64 | 0.55 | 0.47 | 0.24 | 0.47 | 1872.81 |
| 2017 | Canada | Elora | 1003 | 187 | 2 | 3 | 0.65 | 0.62 | 0.61 | 0.54 | 0.24 | 0.45 | 1844.81 |
| 2017 | Canada | Elora | 1004 | 171 | 2 | 3 | 0.63 | 0.7  | 0.64 | 0.56 | 0.34 | 0.41 | 1228.81 |
| 2017 | Canada | Elora | 1005 | 114 | 2 | 3 | 0.68 | 0.68 | 0.69 | 0.52 | 0.25 | 0.41 | 1839.21 |
| 2017 | Canada | Elora | 1006 | 261 | 2 | 3 | 0.7  | 0.7  | 0.68 | 0.56 | 0.33 | 0.48 | 2203.21 |
| 2017 | Canada | Elora | 1007 | 79  | 2 | 3 | 0.7  | 0.6  | 0.63 | 0.53 | 0.3  | 0.50 | 450.41  |
| 2017 | Canada | Elora | 1008 | 193 | 2 | 3 | 0.7  | 0.72 | 0.66 | 0.48 | 0.31 | 0.48 | 760.03  |
| 2017 | Canada | Elora | 1009 | 7   | 2 | 3 | 0.7  | 0.64 | 0.54 | 0.44 | 0.26 | 0.51 | 1755.21 |
| 2017 | Canada | Elora | 1010 | 139 | 2 | 3 | 0.68 | 0.65 | 0.61 | 0.55 | 0.35 | 0.49 | 2242.41 |
| 2017 | Canada | Elora | 1011 | 259 | 2 | 3 | 0.67 | 0.71 | 0.66 | 0.53 | 0.28 | 0.51 | 1298.86 |
| 2017 | Canada | Elora | 1012 | 191 | 2 | 3 | 0.68 | 0.65 | 0.68 | 0.58 | 0.3  | 0.45 | 1522.86 |
| 2017 | Canada | Elora | 1013 | 81  | 2 | 3 | 0.64 | 0.64 | 0.61 | 0.5  | 0.34 | 0.44 | 2012.81 |
| 2017 | Canada | Elora | 1014 | 91  | 2 | 3 | 0.62 | 0.66 | 0.62 | 0.51 | 0.28 | 0.46 | 2925.61 |
| 2017 | Canada | Elora | 1015 | 201 | 2 | 3 | 0.69 | 0.63 | 0.68 | 0.57 | 0.29 | 0.43 | 2192.01 |

|      |        |       |      |     |   |   |      |      |      |      |      |      |         |
|------|--------|-------|------|-----|---|---|------|------|------|------|------|------|---------|
| 2017 | Canada | Elora | 1016 | 249 | 2 | 3 | 0.68 | 0.73 | 0.7  | 0.67 | 0.35 | 0.47 | 4538.41 |
| 2017 | Canada | Elora | 1017 | 240 | 2 | 3 | 0.66 | 0.73 | 0.66 | 0.64 | 0.39 | 0.44 | 2936.81 |
| 2017 | Canada | Elora | 1018 | 207 | 2 | 3 | 0.66 | 0.7  | 0.71 | 0.65 | 0.41 | 0.43 | 848.01  |
| 2017 | Canada | Elora | 1019 | 292 | 2 | 3 | 0.7  | 0.69 | 0.71 | 0.67 | 0.34 | 0.43 | 1822.41 |
| 2017 | Canada | Elora | 1020 | 164 | 2 | 3 | 0.64 | 0.67 | 0.65 | 0.58 | 0.35 | 0.42 | 3155.21 |
| 2017 | Canada | Elora | 1021 | 170 | 2 | 4 | 0.62 | 0.71 | 0.61 | 0.55 | 0.24 | 0.48 | 3821.61 |
| 2017 | Canada | Elora | 1022 | 272 | 2 | 4 | 0.57 | 0.61 | 0.65 | 0.58 | 0.25 | 0.45 | 965.61  |
| 2017 | Canada | Elora | 1023 | 256 | 2 | 4 | 0.59 | 0.56 | 0.59 | 0.55 | 0.23 | 0.46 | 3032.01 |
| 2017 | Canada | Elora | 1024 | 8   | 2 | 4 | 0.63 | 0.66 | 0.61 | 0.54 | 0.33 | 0.45 | 3544.46 |
| 2017 | Canada | Elora | 1025 | 241 | 2 | 4 | 0.66 | 0.71 | 0.65 | 0.6  | 0.26 | 0.46 | 2147.21 |
| 2017 | Canada | Elora | 1026 | 64  | 2 | 4 | 0.67 | 0.65 | 0.67 | 0.56 | 0.33 | 0.43 | 1102.86 |
| 2017 | Canada | Elora | 1027 | 235 | 2 | 4 | 0.62 | 0.63 | 0.63 | 0.55 | 0.29 | 0.47 | 2575.66 |
| 2017 | Canada | Elora | 1028 | 40  | 2 | 4 | 0.64 | 0.65 | 0.57 | 0.51 | 0.32 | 0.47 | 786.41  |
| 2017 | Canada | Elora | 1029 | 68  | 2 | 4 | 0.6  | 0.6  | 0.65 | 0.56 | 0.28 | 0.43 | 4840.81 |
| 2017 | Canada | Elora | 1030 | 133 | 2 | 4 | 0.62 | 0.61 | 0.59 | 0.54 | 0.26 | 0.48 | 4180.01 |
| 2017 | Canada | Elora | 1031 | 318 | 2 | 4 | 0.64 | 0.71 | 0.69 | 0.67 | 0.46 | 0.47 | 2712.81 |
| 2017 | Canada | Elora | 1032 | 291 | 2 | 4 | 0.62 | 0.69 | 0.65 | 0.61 | 0.37 | 0.48 | 1307.21 |
| 2017 | Canada | Elora | 1033 | 102 | 2 | 4 | 0.64 | 0.68 | 0.62 | 0.53 | 0.33 | 0.45 | 1161.61 |
| 2017 | Canada | Elora | 1034 | 39  | 2 | 4 | 0.64 | 0.6  | 0.59 | 0.52 | 0.34 | 0.45 | 1206.41 |
| 2017 | Canada | Elora | 1035 | 138 | 2 | 4 | 0.63 | 0.61 | 0.61 | 0.53 | 0.27 | 0.42 | 1178.41 |
| 2017 | Canada | Elora | 1036 | 147 | 2 | 4 | 0.62 | 0.64 | 0.64 | 0.57 | 0.33 | 0.45 | 3564.01 |
| 2017 | Canada | Elora | 1037 | 23  | 2 | 4 | 0.7  | 0.66 | 0.62 | 0.52 | 0.38 | 0.41 | 1928.81 |
| 2017 | Canada | Elora | 1038 | 217 | 2 | 4 | 0.64 | 0.63 | 0.62 | 0.56 | 0.37 | 0.43 | 2088.46 |
| 2017 | Canada | Elora | 1039 | 92  | 2 | 4 | 0.67 | 0.62 | 0.63 | 0.56 | 0.34 | 0.44 | 3004.01 |
| 2017 | Canada | Elora | 1040 | 199 | 2 | 4 | 0.66 | 0.64 | 0.68 | 0.57 | 0.31 | 0.42 | 2500.01 |
| 2017 | Canada | Elora | 1041 | 218 | 2 | 5 | 0.74 | 0.71 | 0.69 | 0.55 | 0.29 | 0.48 | 1245.61 |
| 2017 | Canada | Elora | 1042 | 45  | 2 | 5 | 0.67 | 0.67 | 0.61 | 0.56 | 0.34 | 0.47 | 1620.81 |
| 2017 | Canada | Elora | 1043 | 32  | 2 | 5 | 0.65 | 0.66 | 0.6  | 0.5  | 0.28 | 0.48 | 864.81  |
| 2017 | Canada | Elora | 1044 | 98  | 2 | 5 | 0.6  | 0.6  | 0.66 | 0.54 | 0.34 | 0.45 | 1570.41 |
| 2017 | Canada | Elora | 1045 | 281 | 2 | 5 | 0.67 | 0.66 | 0.65 | 0.56 | 0.3  | 0.45 | 1335.21 |
| 2017 | Canada | Elora | 1046 | 284 | 2 | 5 | 0.69 | 0.65 | 0.64 | 0.58 | 0.32 | 0.45 | 1755.21 |
| 2017 | Canada | Elora | 1047 | 122 | 2 | 5 | 0.71 | 0.71 | 0.64 | 0.52 | 0.35 | 0.45 | 360.81  |
| 2017 | Canada | Elora | 1048 | 173 | 2 | 5 | 0.74 | 0.61 | 0.61 | 0.55 | 0.32 | 0.43 | 1945.61 |



|      |        |       |      |     |   |   |      |      |      |      |      |      |         |
|------|--------|-------|------|-----|---|---|------|------|------|------|------|------|---------|
| 2017 | Canada | Elora | 1049 | 24  | 2 | 5 | 0.7  | 0.7  | 0.59 | 0.44 | 0.28 | 0.51 | 2432.81 |
| 2017 | Canada | Elora | 1050 | 129 | 2 | 5 | 0.67 | 0.72 | 0.72 | 0.63 | 0.33 | 0.45 | 2628.81 |
| 2017 | Canada | Elora | 1051 | 176 | 2 | 5 | 0.68 | 0.63 | 0.67 | 0.6  | 0.27 | 0.43 | 2270.41 |
| 2017 | Canada | Elora | 1052 | 58  | 2 | 5 | 0.65 | 0.7  | 0.69 | 0.6  | 0.31 | 0.48 | 1410.86 |
| 2017 | Canada | Elora | 1053 | 152 | 2 | 5 | 0.67 | 0.66 | 0.69 | 0.58 | 0.31 | 0.46 | 1508.81 |
| 2017 | Canada | Elora | 1054 | 69  | 2 | 5 | 0.63 | 0.67 | 0.64 | 0.58 | 0.29 | 0.47 | 1629.26 |
| 2017 | Canada | Elora | 1055 | 168 | 2 | 5 | 0.72 | 0.69 | 0.67 | 0.59 | 0.39 | 0.51 | 853.61  |
| 2017 | Canada | Elora | 1056 | 234 | 2 | 5 | 0.69 | 0.67 | 0.6  | 0.55 | 0.34 | 0.45 | 1441.61 |
| 2017 | Canada | Elora | 1057 | 38  | 2 | 5 | 0.65 | 0.7  | 0.64 | 0.56 | 0.29 | 0.48 | 1783.21 |
| 2017 | Canada | Elora | 1058 | 22  | 2 | 5 | 0.66 | 0.69 | 0.66 | 0.59 | 0.32 | 0.46 | 2696.01 |
| 2017 | Canada | Elora | 1059 | 313 | 2 | 5 | 0.63 | 0.72 | 0.66 | 0.57 | 0.28 | 0.45 | 1245.61 |
| 2017 | Canada | Elora | 1060 | 74  | 2 | 5 | 0.67 | 0.7  | 0.64 | 0.62 | 0.32 | 0.42 | 2746.41 |
| 2017 | Canada | Elora | 1061 | 158 | 2 | 6 | 0.66 | 0.52 | 0.65 | 0.55 | 0.42 | 0.40 | 3639.66 |
| 2017 | Canada | Elora | 1062 | 185 | 2 | 6 | 0.61 | 0.56 | 0.61 | 0.6  | 0.35 | 0.46 | 1128.01 |
| 2017 | Canada | Elora | 1063 | 294 | 2 | 6 | 0.61 | 0.56 | 0.6  | 0.54 | 0.32 | 0.46 | 842.41  |
| 2017 | Canada | Elora | 1064 | 148 | 2 | 6 | 0.61 | 0.64 | 0.61 | 0.55 | 0.3  | 0.51 | 4026.06 |
| 2017 | Canada | Elora | 1065 | 80  | 2 | 6 | 0.66 | 0.64 | 0.64 | 0.54 | 0.31 | 0.47 | 2404.81 |
| 2017 | Canada | Elora | 1066 | 203 | 2 | 6 | 0.69 | 0.62 | 0.65 | 0.62 | 0.33 | 0.50 | 2231.21 |
| 2017 | Canada | Elora | 1067 | 214 | 2 | 6 | 0.6  | 0.62 | 0.64 | 0.55 | 0.27 | 0.50 | 573.61  |
| 2017 | Canada | Elora | 1068 | 232 | 2 | 6 | 0.68 | 0.66 | 0.66 | 0.56 | 0.24 | 0.51 | 775.21  |
| 2017 | Canada | Elora | 1069 | 1   | 2 | 6 | 0.68 | 0.72 | 0.61 | 0.56 | 0.27 | 0.46 | 1816.81 |
| 2017 | Canada | Elora | 1070 | 12  | 2 | 6 | 0.7  | 0.72 | 0.63 | 0.63 | 0.39 | 0.48 | 3328.81 |
| 2017 | Canada | Elora | 1071 | 296 | 2 | 6 | 0.65 | 0.72 | 0.65 | 0.58 | 0.38 | 0.47 | 3527.66 |
| 2017 | Canada | Elora | 1072 | 125 | 2 | 6 | 0.69 | 0.72 | 0.74 | 0.66 | 0.35 | 0.48 | 1727.21 |
| 2017 | Canada | Elora | 1073 | 93  | 2 | 6 | 0.67 | 0.69 | 0.66 | 0.63 | 0.35 | 0.45 | 842.41  |
| 2017 | Canada | Elora | 1074 | 209 | 2 | 6 | 0.66 | 0.68 | 0.68 | 0.62 | 0.39 | 0.53 | 1730.06 |
| 2017 | Canada | Elora | 1075 | 43  | 2 | 6 | 0.69 | 0.65 | 0.66 | 0.54 | 0.35 | 0.48 | 1206.41 |
| 2017 | Canada | Elora | 1076 | 126 | 2 | 6 | 0.55 | 0.51 | 0.48 | 0.32 | 0.31 | 0.48 | 1679.66 |
| 2017 | Canada | Elora | 1077 | 55  | 2 | 6 | 0.66 | 0.63 | 0.6  | 0.56 | 0.32 | 0.50 | 3323.21 |
| 2017 | Canada | Elora | 1078 | 66  | 2 | 6 | 0.7  | 0.59 | 0.59 | 0.5  | 0.28 | 0.44 | 2757.61 |
| 2017 | Canada | Elora | 1079 | 200 | 2 | 6 | 0.62 | 0.58 | 0.61 | 0.56 | 0.31 | 0.46 | 1035.66 |
| 2017 | Canada | Elora | 1080 | 238 | 2 | 6 | 0.73 | 0.63 | 0.66 | 0.57 | 0.39 | 0.44 | 1296.01 |
| 2017 | Canada | Elora | 1081 | 156 | 2 | 7 | 0.68 | 0.65 | 0.51 | 0.51 | 0.28 | 0.53 | 1254.06 |

|      |        |       |      |     |   |   |      |      |      |      |      |      |         |
|------|--------|-------|------|-----|---|---|------|------|------|------|------|------|---------|
| 2017 | Canada | Elora | 1082 | 29  | 2 | 7 | 0.65 | 0.63 | 0.69 | 0.58 | 0.4  | 0.47 | 1161.61 |
| 2017 | Canada | Elora | 1083 | 110 | 2 | 7 | 0.64 | 0.59 | 0.6  | 0.52 | 0.27 | 0.53 | 1060.81 |
| 2017 | Canada | Elora | 1084 | 25  | 2 | 7 | 0.66 | 0.65 | 0.65 | 0.55 | 0.3  | 0.54 | 3396.01 |
| 2017 | Canada | Elora | 1085 | 204 | 2 | 7 | 0.7  | 0.66 | 0.65 | 0.55 | 0.36 | 0.53 | 3065.61 |
| 2017 | Canada | Elora | 1086 | 197 | 2 | 7 | 0.66 | 0.69 | 0.67 | 0.62 | 0.35 | 0.50 | 3290.90 |
| 2017 | Canada | Elora | 1087 | 208 | 2 | 7 | 0.68 | 0.71 | 0.68 | 0.59 | 0.35 | 0.52 | 2903.21 |
| 2017 | Canada | Elora | 1088 | 237 | 2 | 7 | 0.63 | 0.65 | 0.62 | 0.56 | 0.4  | 0.48 | 1923.21 |
| 2017 | Canada | Elora | 1089 | 254 | 2 | 7 | 0.64 | 0.66 | 0.66 | 0.59 | 0.3  | 0.50 | 551.21  |
| 2017 | Canada | Elora | 1090 | 251 | 2 | 7 | 0.6  | 0.67 | 0.67 | 0.59 | 0.38 | 0.48 | 556.81  |
| 2017 | Canada | Elora | 1091 | 317 | 2 | 7 | 0.68 | 0.69 | 0.65 | 0.55 | 0.29 | 0.49 | 2091.21 |
| 2017 | Canada | Elora | 1092 | 78  | 2 | 7 | 0.68 | 0.66 | 0.62 | 0.54 | 0.26 | 0.50 | 3471.66 |
| 2017 | Canada | Elora | 1093 | 5   | 2 | 7 | 0.59 | 0.56 | 0.46 | 0.43 | 0.21 | 0.49 | 2886.41 |
| 2017 | Canada | Elora | 1094 | 247 | 2 | 7 | 0.62 | 0.67 | 0.69 | 0.58 | 0.32 | 0.48 | 3141.26 |
| 2017 | Canada | Elora | 1095 | 182 | 2 | 7 | 0.67 | 0.68 | 0.66 | 0.63 | 0.28 | 0.50 | 2894.86 |
| 2017 | Canada | Elora | 1096 | 307 | 2 | 7 | 0.64 | 0.67 | 0.67 | 0.64 | 0.32 | 0.47 | 892.81  |
| 2017 | Canada | Elora | 1097 | 181 | 2 | 7 | 0.62 | 0.61 | 0.65 | 0.58 | 0.33 | 0.48 | 2864.01 |
| 2017 | Canada | Elora | 1098 | 286 | 2 | 7 | 0.63 | 0.66 | 0.68 | 0.63 | 0.31 | 0.45 | 2494.41 |
| 2017 | Canada | Elora | 1099 | 62  | 2 | 7 | 0.67 | 0.6  | 0.6  | 0.53 | 0.34 | 0.46 | 1122.41 |
| 2017 | Canada | Elora | 1100 | 134 | 2 | 7 | 0.69 | 0.64 | 0.61 | 0.6  | 0.34 | 0.47 | 1016.01 |
| 2017 | Canada | Elora | 1101 | 172 | 2 | 8 | 0.67 | 0.67 | 0.66 | 0.56 | 0.31 | 0.54 | 461.61  |
| 2017 | Canada | Elora | 1102 | 276 | 2 | 8 | 0.73 | 0.68 | 0.67 | 0.65 | 0.35 | 0.53 | 2931.21 |
| 2017 | Canada | Elora | 1103 | 124 | 2 | 8 | 0.69 | 0.72 | 0.65 | 0.57 | 0.32 | 0.52 | 2782.86 |
| 2017 | Canada | Elora | 1104 | 6   | 2 | 8 | 0.77 | 0.71 | 0.6  | 0.45 | 0.28 | 0.52 | 1315.66 |
| 2017 | Canada | Elora | 1105 | 18  | 2 | 8 | 0.74 | 0.73 | 0.71 | 0.62 | 0.33 | 0.53 | 943.21  |
| 2017 | Canada | Elora | 1106 | 84  | 2 | 8 | 0.65 | 0.68 | 0.65 | 0.63 | 0.29 | 0.50 | 1174.82 |
| 2017 | Canada | Elora | 1107 | 20  | 2 | 8 | 0.71 | 0.71 | 0.65 | 0.58 | 0.27 | 0.51 | 814.41  |
| 2017 | Canada | Elora | 1108 | 210 | 2 | 8 | 0.68 | 0.75 | 0.62 | 0.59 | 0.36 | 0.54 | 1346.41 |
| 2017 | Canada | Elora | 1109 | 72  | 2 | 8 | 0.66 | 0.65 | 0.58 | 0.5  | 0.28 | 0.51 | 1906.41 |
| 2017 | Canada | Elora | 1110 | 303 | 2 | 8 | 0.68 | 0.68 | 0.64 | 0.56 | 0.2  | 0.52 | 1189.61 |
| 2017 | Canada | Elora | 1111 | 245 | 2 | 8 | 0.66 | 0.61 | 0.6  | 0.49 | 0.27 | 0.57 | 1480.81 |
| 2017 | Canada | Elora | 1112 | 305 | 2 | 8 | 0.71 | 0.73 | 0.68 | 0.6  | 0.29 | 0.50 | 870.41  |
| 2017 | Canada | Elora | 1113 | 195 | 2 | 8 | 0.72 | 0.65 | 0.67 | 0.62 | 0.3  | 0.50 | 2936.81 |
| 2017 | Canada | Elora | 1114 | 213 | 2 | 8 | 0.7  | 0.68 | 0.67 | 0.65 | 0.27 | 0.56 | 1674.06 |

|      |        |       |      |     |   |    |      |      |      |      |      |      |         |
|------|--------|-------|------|-----|---|----|------|------|------|------|------|------|---------|
| 2017 | Canada | Elora | 1115 | 132 | 2 | 8  | 0.69 | 0.7  | 0.58 | 0.49 | 0.3  | 0.53 | 1875.66 |
| 2017 | Canada | Elora | 1116 | 205 | 2 | 8  | 0.75 | 0.72 | 0.74 | 0.58 | 0.33 | 0.53 | 1150.41 |
| 2017 | Canada | Elora | 1117 | 155 | 2 | 8  | 0.65 | 0.66 | 0.64 | 0.51 | 0.32 | 0.48 | 3172.01 |
| 2017 | Canada | Elora | 1118 | 178 | 2 | 8  | 0.66 | 0.66 | 0.66 | 0.63 | 0.33 | 0.45 | 2626.06 |
| 2017 | Canada | Elora | 1119 | 53  | 2 | 8  | 0.65 | 0.59 | 0.58 | 0.51 | 0.26 | 0.48 | 3676.01 |
| 2017 | Canada | Elora | 1120 | 17  | 2 | 8  | 0.7  | 0.74 | 0.61 | 0.65 | 0.41 | 0.44 | 2046.41 |
| 2017 | Canada | Elora | 1121 | 196 | 2 | 9  | 0.7  | 0.71 | 0.69 | 0.66 | 0.28 | 0.52 | 1822.41 |
| 2017 | Canada | Elora | 1122 | 262 | 2 | 9  | 0.64 | 0.67 | 0.66 | 0.61 | 0.35 | 0.57 | 2256.46 |
| 2017 | Canada | Elora | 1123 | 136 | 2 | 9  | 0.7  | 0.69 | 0.64 | 0.52 | 0.36 | 0.55 | 1872.81 |
| 2017 | Canada | Elora | 1124 | 3   | 2 | 9  | 0.57 | 0.63 | 0.67 | 0.61 | 0.26 | 0.58 | 1150.41 |
| 2017 | Canada | Elora | 1125 | 49  | 2 | 9  | 0.63 | 0.7  | 0.7  | 0.6  | 0.4  | 0.53 | 1044.01 |
| 2017 | Canada | Elora | 1126 | 274 | 2 | 9  | 0.64 | 0.64 | 0.64 | 0.59 | 0.39 | 0.53 | 2360.01 |
| 2017 | Canada | Elora | 1127 | 90  | 2 | 9  | 0.64 | 0.62 | 0.59 | 0.53 | 0.34 | 0.56 | 1139.21 |
| 2017 | Canada | Elora | 1128 | 31  | 2 | 9  | 0.7  | 0.67 | 0.71 | 0.64 | 0.31 | 0.57 | 909.61  |
| 2017 | Canada | Elora | 1129 | 288 | 2 | 9  | 0.69 | 0.66 | 0.66 | 0.56 | 0.35 | 0.53 | 2404.81 |
| 2017 | Canada | Elora | 1130 | 50  | 2 | 9  | 0.67 | 0.67 | 0.66 | 0.58 | 0.31 | 0.51 | 2987.21 |
| 2017 | Canada | Elora | 1131 | 57  | 2 | 9  | 0.68 | 0.63 | 0.61 | 0.54 | 0.35 | 0.52 | 3034.86 |
| 2017 | Canada | Elora | 1132 | 202 | 2 | 9  | 0.69 | 0.72 | 0.7  | 0.66 | 0.29 | 0.56 | 1133.61 |
| 2017 | Canada | Elora | 1133 | 309 | 2 | 9  | 0.72 | 0.71 | 0.69 | 0.55 | 0.36 | 0.51 | 2578.41 |
| 2017 | Canada | Elora | 1134 | 216 | 2 | 9  | 0.74 | 0.75 | 0.77 | 0.75 | 0.38 | 0.50 | 2875.21 |
| 2017 | Canada | Elora | 1135 | 9   | 2 | 9  | 0.74 | 0.73 | 0.71 | 0.64 | 0.51 | 0.52 | 1100.01 |
| 2017 | Canada | Elora | 1136 | 35  | 2 | 9  | 0.75 | 0.68 | 0.68 | 0.72 | 0.44 | 0.48 | 2119.21 |
| 2017 | Canada | Elora | 1137 | 140 | 2 | 9  | 0.66 | 0.63 | 0.67 | 0.58 | 0.5  | 0.49 | 1847.66 |
| 2017 | Canada | Elora | 1138 | 33  | 2 | 9  | 0.62 | 0.61 | 0.6  | 0.54 | 0.4  | 0.51 | 1811.21 |
| 2017 | Canada | Elora | 1139 | 265 | 2 | 9  | 0.65 | 0.65 | 0.66 | 0.64 | 0.42 | 0.46 | 1696.46 |
| 2017 | Canada | Elora | 1140 | 112 | 2 | 9  | 0.68 | 0.6  | 0.59 | 0.53 | 0.35 | 0.49 | 2220.01 |
| 2017 | Canada | Elora | 1141 | 244 | 2 | 10 | 0.63 | 0.63 | 0.64 | 0.61 | 0.39 | 0.55 | 1480.81 |
| 2017 | Canada | Elora | 1142 | 99  | 2 | 10 | 0.68 | 0.67 | 0.63 | 0.55 | 0.36 | 0.53 | 2220.01 |
| 2017 | Canada | Elora | 1143 | 233 | 2 | 10 | 0.65 | 0.62 | 0.59 | 0.55 | 0.35 | 0.56 | 3211.21 |
| 2017 | Canada | Elora | 1144 | 47  | 2 | 10 | 0.72 | 0.69 | 0.64 | 0.61 | 0.41 | 0.55 | 3950.41 |
| 2017 | Canada | Elora | 1145 | 298 | 2 | 10 | 0.66 | 0.7  | 0.69 | 0.64 | 0.3  | 0.50 | 556.81  |
| 2017 | Canada | Elora | 1146 | 86  | 2 | 10 | 0.72 | 0.71 | 0.68 | 0.65 | 0.29 | 0.52 | 2091.21 |
| 2017 | Canada | Elora | 1147 | 212 | 2 | 10 | 0.63 | 0.72 | 0.6  | 0.59 | 0.28 | 0.54 | 1410.86 |

|      |        |       |      |     |   |    |      |      |      |      |      |      |         |
|------|--------|-------|------|-----|---|----|------|------|------|------|------|------|---------|
| 2017 | Canada | Elora | 1148 | 115 | 2 | 10 | 0.72 | 0.72 | 0.67 | 0.55 | 0.36 | 0.48 | 344.01  |
| 2017 | Canada | Elora | 1149 | 183 | 2 | 10 | 0.64 | 0.68 | 0.64 | 0.55 | 0.3  | 0.50 | 1895.21 |
| 2017 | Canada | Elora | 1150 | 48  | 2 | 10 | 0.63 | 0.56 | 0.6  | 0.49 | 0.32 | 0.53 | 2729.61 |
| 2017 | Canada | Elora | 1151 | 282 | 2 | 10 | 0.7  | 0.65 | 0.54 | 0.45 | 0.27 | 0.52 | 394.41  |
| 2017 | Canada | Elora | 1152 | 142 | 2 | 10 | 0.57 | 0.6  | 0.65 | 0.6  | 0.28 | 0.50 | 814.41  |
| 2017 | Canada | Elora | 1153 | 260 | 2 | 10 | 0.59 | 0.64 | 0.63 | 0.57 | 0.37 | 0.49 | 1139.21 |
| 2017 | Canada | Elora | 1154 | 41  | 2 | 10 | 0.68 | 0.67 | 0.6  | 0.52 | 0.2  | 0.49 | 1962.41 |
| 2017 | Canada | Elora | 1155 | 56  | 2 | 10 | 0.61 | 0.62 | 0.55 | 0.48 | 0.32 | 0.51 | 2662.41 |
| 2017 | Canada | Elora | 1156 | 107 | 2 | 10 | 0.65 | 0.63 | 0.58 | 0.51 | 0.3  | 0.50 | 1469.61 |
| 2017 | Canada | Elora | 1157 | 52  | 2 | 10 | 0.54 | 0.53 | 0.6  | 0.56 | 0.29 | 0.46 | 3407.21 |
| 2017 | Canada | Elora | 1158 | 250 | 2 | 10 | 0.59 | 0.61 | 0.63 | 0.59 | 0.29 | 0.53 | 629.61  |
| 2017 | Canada | Elora | 1159 | 167 | 2 | 10 | 0.54 | 0.58 | 0.53 | 0.45 | 0.3  | 0.49 | 1307.21 |
| 2017 | Canada | Elora | 1160 | 13  | 2 | 10 | 0.58 | 0.59 | 0.58 | 0.56 | 0.3  | 0.51 | 1805.61 |
| 2017 | Canada | Elora | 1161 | 16  | 2 | 11 | 0.74 | 0.67 | 0.58 | 0.58 | 0.27 | 0.52 | 2981.61 |
| 2017 | Canada | Elora | 1162 | 145 | 2 | 11 | 0.6  | 0.65 | 0.57 | 0.5  | 0.33 | 0.52 | 1620.81 |
| 2017 | Canada | Elora | 1163 | 211 | 2 | 11 | 0.56 | 0.62 | 0.57 | 0.56 | 0.31 | 0.56 | 1234.41 |
| 2017 | Canada | Elora | 1164 | 315 | 2 | 11 | 0.65 | 0.68 | 0.7  | 0.66 | 0.25 | 0.53 | 1032.81 |
| 2017 | Canada | Elora | 1165 | 105 | 2 | 11 | 0.66 | 0.68 | 0.7  | 0.6  | 0.41 | 0.52 | 2147.21 |
| 2017 | Canada | Elora | 1166 | 289 | 2 | 11 | 0.65 | 0.67 | 0.58 | 0.52 | 0.34 | 0.54 | 3485.61 |
| 2017 | Canada | Elora | 1167 | 2   | 2 | 11 | 0.73 | 0.75 | 0.66 | 0.56 | 0.33 | 0.51 | 612.81  |
| 2017 | Canada | Elora | 1168 | 277 | 2 | 11 | 0.65 | 0.66 | 0.64 | 0.61 | 0.45 | 0.46 | 680.01  |
| 2017 | Canada | Elora | 1169 | 278 | 2 | 11 | 0.58 | 0.6  | 0.65 | 0.51 | 0.35 | 0.48 | 2746.41 |
| 2017 | Canada | Elora | 1170 | 77  | 2 | 11 | 0.66 | 0.65 | 0.54 | 0.47 | 0.27 | 0.49 | 932.01  |
| 2017 | Canada | Elora | 1171 | 36  | 2 | 11 | 0.62 | 0.68 | 0.56 | 0.52 | 0.31 | 0.54 | 730.41  |
| 2017 | Canada | Elora | 1172 | 160 | 2 | 11 | 0.63 | 0.64 | 0.62 | 0.62 | 0.38 | 0.50 | 3194.41 |
| 2017 | Canada | Elora | 1173 | 85  | 2 | 11 | 0.69 | 0.7  | 0.62 | 0.67 | 0.27 | 0.55 | 2662.41 |
| 2017 | Canada | Elora | 1174 | 60  | 2 | 11 | 0.61 | 0.64 | 0.6  | 0.51 | 0.3  | 0.52 | 1587.21 |
| 2017 | Canada | Elora | 1175 | 297 | 2 | 11 | 0.65 | 0.65 | 0.64 | 0.61 | 0.26 | 0.54 | 2785.61 |
| 2017 | Canada | Elora | 1176 | 189 | 2 | 11 | 0.58 | 0.61 | 0.62 | 0.58 | 0.21 | 0.51 | 2144.46 |
| 2017 | Canada | Elora | 1177 | 161 | 2 | 11 | 0.6  | 0.58 | 0.55 | 0.5  | 0.36 | 0.50 | 3107.66 |
| 2017 | Canada | Elora | 1178 | 243 | 2 | 11 | 0.63 | 0.64 | 0.65 | 0.56 | 0.34 | 0.54 | 4426.41 |
| 2017 | Canada | Elora | 1179 | 188 | 2 | 11 | 0.69 | 0.68 | 0.6  | 0.51 | 0.36 | 0.56 | 1497.61 |
| 2017 | Canada | Elora | 1180 | 206 | 2 | 11 | 0.63 | 0.66 | 0.62 | 0.57 | 0.41 | 0.50 | 2668.01 |

|      |        |       |      |     |   |    |      |      |      |      |      |      |         |
|------|--------|-------|------|-----|---|----|------|------|------|------|------|------|---------|
| 2017 | Canada | Elora | 1181 | 227 | 2 | 12 | 0.68 | 0.64 | 0.65 | 0.57 | 0.35 | 0.51 | 1800.01 |
| 2017 | Canada | Elora | 1182 | 154 | 2 | 12 | 0.59 | 0.58 | 0.59 | 0.51 | 0.34 | 0.54 | 2365.61 |
| 2017 | Canada | Elora | 1183 | 150 | 2 | 12 | 0.61 | 0.61 | 0.61 | 0.49 | 0.3  | 0.52 | 1077.61 |
| 2017 | Canada | Elora | 1184 | 219 | 2 | 12 | 0.65 | 0.61 | 0.65 | 0.62 | 0.35 | 0.47 | 943.21  |
| 2017 | Canada | Elora | 1185 | 101 | 2 | 12 | 0.66 | 0.68 | 0.65 | 0.6  | 0.3  | 0.49 | 1128.01 |
| 2017 | Canada | Elora | 1186 | 96  | 2 | 12 | 0.65 | 0.66 | 0.57 | 0.47 | 0.35 | 0.54 | 2063.21 |
| 2017 | Canada | Elora | 1187 | 44  | 2 | 12 | 0.64 | 0.62 | 0.5  | 0.44 | 0.31 | 0.51 | 3435.21 |
| 2017 | Canada | Elora | 1188 | 137 | 2 | 12 | 0.64 | 0.59 | 0.53 | 0.46 | 0.39 | 0.53 | 1391.21 |
| 2017 | Canada | Elora | 1189 | 67  | 2 | 12 | 0.6  | 0.61 | 0.51 | 0.53 | 0.31 | 0.51 | 2494.41 |
| 2017 | Canada | Elora | 1190 | 179 | 2 | 12 | 0.67 | 0.66 | 0.58 | 0.57 | 0.27 | 0.52 | 4594.41 |
| 2017 | Canada | Elora | 1191 | 130 | 2 | 12 | 0.61 | 0.63 | 0.59 | 0.52 | 0.32 | 0.48 | 551.21  |
| 2017 | Canada | Elora | 1192 | 310 | 2 | 12 | 0.7  | 0.71 | 0.64 | 0.58 | 0.38 | 0.51 | 1539.66 |
| 2017 | Canada | Elora | 1193 | 308 | 2 | 12 | 0.68 | 0.66 | 0.68 | 0.64 | 0.37 | 0.50 | 2004.46 |
| 2017 | Canada | Elora | 1194 | 113 | 2 | 12 | 0.68 | 0.67 | 0.55 | 0.4  | 0.3  | 0.53 | 3306.41 |
| 2017 | Canada | Elora | 1195 | 54  | 2 | 12 | 0.68 | 0.7  | 0.61 | 0.55 | 0.27 | 0.54 | 3121.61 |
| 2017 | Canada | Elora | 1196 | 59  | 2 | 12 | 0.62 | 0.64 | 0.6  | 0.49 | 0.3  | 0.50 | 2539.21 |
| 2017 | Canada | Elora | 1197 | 175 | 2 | 12 | 0.61 | 0.57 | 0.6  | 0.53 | 0.28 | 0.54 | 2976.01 |
| 2017 | Canada | Elora | 1198 | 320 | 2 | 12 | 0.59 | 0.63 | 0.63 | 0.53 | 0.32 | 0.50 | 2248.01 |
| 2017 | Canada | Elora | 1199 | 253 | 2 | 12 | 0.68 | 0.67 | 0.64 | 0.57 | 0.26 | 0.55 | 1021.61 |
| 2017 | Canada | Elora | 1200 | 295 | 2 | 12 | 0.69 | 0.65 | 0.65 | 0.64 | 0.4  | 0.49 | 842.41  |
| 2017 | Canada | Elora | 1201 | 252 | 2 | 13 | 0.67 | 0.67 | 0.59 | 0.49 | 0.33 | 0.49 | 1321.26 |
| 2017 | Canada | Elora | 1202 | 186 | 2 | 13 | 0.66 | 0.69 | 0.58 | 0.5  | 0.31 | 0.47 | 2640.01 |
| 2017 | Canada | Elora | 1203 | 34  | 2 | 13 | 0.59 | 0.58 | 0.49 | 0.45 | 0.32 | 0.52 | 1167.21 |
| 2017 | Canada | Elora | 1204 | 82  | 2 | 13 | 0.55 | 0.58 | 0.52 | 0.45 | 0.35 | 0.53 | 2477.61 |
| 2017 | Canada | Elora | 1205 | 19  | 2 | 13 | 0.58 | 0.61 | 0.64 | 0.52 | 0.26 | 0.42 | 2164.01 |
| 2017 | Canada | Elora | 1206 | 159 | 2 | 13 | 0.58 | 0.55 | 0.49 | 0.45 | 0.29 | 0.52 | 1564.81 |
| 2017 | Canada | Elora | 1207 | 95  | 2 | 13 | 0.55 | 0.52 | 0.51 | 0.47 | 0.32 | 0.50 | 2561.61 |
| 2017 | Canada | Elora | 1208 | 306 | 2 | 13 | 0.66 | 0.66 | 0.68 | 0.63 | 0.33 | 0.45 | 1321.26 |
| 2017 | Canada | Elora | 1209 | 117 | 2 | 13 | 0.63 | 0.61 | 0.56 | 0.46 | 0.31 | 0.48 | 685.61  |
| 2017 | Canada | Elora | 1210 | 194 | 2 | 13 | 0.59 | 0.61 | 0.61 | 0.53 | 0.35 | 0.45 | 2141.61 |
| 2017 | Canada | Elora | 1211 | 109 | 2 | 13 | 0.63 | 0.64 | 0.59 | 0.51 | 0.35 | 0.52 | 3138.41 |
| 2017 | Canada | Elora | 1212 | 4   | 2 | 13 | 0.67 | 0.66 | 0.59 | 0.52 | 0.28 | 0.51 | 1335.21 |
| 2017 | Canada | Elora | 1213 | 314 | 2 | 13 | 0.61 | 0.58 | 0.59 | 0.58 | 0.28 | 0.47 | 1763.66 |

|      |        |       |      |     |   |    |      |      |      |      |      |      |         |
|------|--------|-------|------|-----|---|----|------|------|------|------|------|------|---------|
| 2017 | Canada | Elora | 1214 | 270 | 2 | 13 | 0.61 | 0.68 | 0.64 | 0.62 | 0.32 | 0.48 | 2998.41 |
| 2017 | Canada | Elora | 1215 | 119 | 2 | 13 | 0.6  | 0.63 | 0.58 | 0.52 | 0.38 | 0.53 | 859.21  |
| 2017 | Canada | Elora | 1216 | 264 | 2 | 13 | 0.67 | 0.69 | 0.64 | 0.56 | 0.39 | 0.45 | 1049.61 |
| 2017 | Canada | Elora | 1217 | 269 | 2 | 13 | 0.63 | 0.61 | 0.55 | 0.53 | 0.31 | 0.52 | 1206.41 |
| 2017 | Canada | Elora | 1218 | 116 | 2 | 13 | 0.64 | 0.6  | 0.62 | 0.42 | 0.24 | 0.54 | 1016.01 |
| 2017 | Canada | Elora | 1219 | 146 | 2 | 13 | 0.57 | 0.58 | 0.52 | 0.42 | 0.29 | 0.52 | 2049.26 |
| 2017 | Canada | Elora | 1220 | 220 | 2 | 13 | 0.6  | 0.63 | 0.56 | 0.51 | 0.33 | 0.56 | 1279.21 |
| 2017 | Canada | Elora | 1221 | 108 | 2 | 14 | 0.52 | 0.55 | 0.53 | 0.43 | 0.31 | 0.55 | 2620.46 |
| 2017 | Canada | Elora | 1222 | 76  | 2 | 14 | 0.52 | 0.56 | 0.56 | 0.46 | 0.32 | 0.49 | 3328.81 |
| 2017 | Canada | Elora | 1223 | 94  | 2 | 14 | 0.69 | 0.63 | 0.51 | 0.41 | 0.29 | 0.49 | 1329.61 |
| 2017 | Canada | Elora | 1224 | 246 | 2 | 14 | 0.6  | 0.63 | 0.61 | 0.5  | 0.31 | 0.54 | 1822.41 |
| 2017 | Canada | Elora | 1225 | 319 | 2 | 14 | 0.5  | 0.55 | 0.59 | 0.57 | 0.32 | 0.55 | 1279.21 |
| 2017 | Canada | Elora | 1226 | 37  | 2 | 14 | 0.7  | 0.68 | 0.58 | 0.53 | 0.37 | 0.55 | 2214.41 |
| 2017 | Canada | Elora | 1227 | 151 | 2 | 14 | 0.54 | 0.58 | 0.54 | 0.43 | 0.36 | 0.57 | 2628.81 |
| 2017 | Canada | Elora | 1228 | 135 | 2 | 14 | 0.7  | 0.67 | 0.59 | 0.58 | 0.28 | 0.47 | 1632.01 |
| 2017 | Canada | Elora | 1229 | 177 | 2 | 14 | 0.62 | 0.59 | 0.59 | 0.49 | 0.36 | 0.49 | 3037.61 |
| 2017 | Canada | Elora | 1230 | 279 | 2 | 14 | 0.58 | 0.58 | 0.62 | 0.53 | 0.31 | 0.49 | 1324.01 |
| 2017 | Canada | Elora | 1231 | 153 | 2 | 14 | 0.65 | 0.64 | 0.57 | 0.5  | 0.38 | 0.47 | 2304.01 |
| 2017 | Canada | Elora | 1232 | 311 | 2 | 14 | 0.63 | 0.62 | 0.65 | 0.6  | 0.29 | 0.52 | 1878.41 |
| 2017 | Canada | Elora | 1233 | 26  | 2 | 14 | 0.58 | 0.63 | 0.61 | 0.56 | 0.32 | 0.49 | 1016.01 |
| 2017 | Canada | Elora | 1234 | 248 | 2 | 14 | 0.61 | 0.62 | 0.63 | 0.6  | 0.27 | 0.48 | 948.81  |
| 2017 | Canada | Elora | 1235 | 71  | 2 | 14 | 0.54 | 0.56 | 0.56 | 0.59 | 0.29 | 0.53 | 2740.81 |
| 2017 | Canada | Elora | 1236 | 42  | 2 | 14 | 0.63 | 0.58 | 0.53 | 0.51 | 0.32 | 0.53 | 915.21  |
| 2017 | Canada | Elora | 1237 | 75  | 2 | 14 | 0.62 | 0.63 | 0.53 | 0.53 | 0.31 | 0.47 | 1758.06 |
| 2017 | Canada | Elora | 1238 | 287 | 2 | 14 | 0.6  | 0.64 | 0.59 | 0.55 | 0.28 | 0.54 | 4798.86 |
| 2017 | Canada | Elora | 1239 | 184 | 2 | 14 | 0.63 | 0.63 | 0.56 | 0.47 | 0.35 | 0.53 | 4549.61 |
| 2017 | Canada | Elora | 1240 | 149 | 2 | 14 | 0.57 | 0.6  | 0.57 | 0.49 | 0.26 | 0.52 | 3295.21 |
| 2017 | Canada | Elora | 1241 | 190 | 2 | 15 | 0.53 | 0.54 | 0.57 | 0.49 | 0.33 | 0.57 | 3956.01 |
| 2017 | Canada | Elora | 1242 | 226 | 2 | 15 | 0.61 | 0.57 | 0.59 | 0.5  | 0.29 | 0.50 | 2418.86 |
| 2017 | Canada | Elora | 1243 | 28  | 2 | 15 | 0.61 | 0.57 | 0.5  | 0.53 | 0.25 | 0.56 | 3200.01 |
| 2017 | Canada | Elora | 1244 | 275 | 2 | 15 | 0.57 | 0.55 | 0.5  | 0.63 | 0.27 | 0.57 | 4056.81 |
| 2017 | Canada | Elora | 1245 | 30  | 2 | 15 | 0.54 | 0.54 | 0.55 | 0.55 | 0.35 | 0.59 | 3748.81 |
| 2017 | Canada | Elora | 1246 | 222 | 2 | 15 | 0.6  | 0.66 | 0.6  | 0.53 | 0.32 | 0.53 | 1828.01 |

|      |        |       |      |     |   |    |      |      |      |      |      |      |         |
|------|--------|-------|------|-----|---|----|------|------|------|------|------|------|---------|
| 2017 | Canada | Elora | 1247 | 299 | 2 | 15 | 0.56 | 0.62 | 0.58 | 0.53 | 0.31 | 0.51 | 2175.21 |
| 2017 | Canada | Elora | 1248 | 268 | 2 | 15 | 0.56 | 0.53 | 0.59 | 0.58 | 0.28 | 0.56 | 1066.41 |
| 2017 | Canada | Elora | 1249 | 97  | 2 | 15 | 0.63 | 0.64 | 0.58 | 0.59 | 0.27 | 0.54 | 1766.41 |
| 2017 | Canada | Elora | 1250 | 123 | 2 | 15 | 0.55 | 0.53 | 0.46 | 0.5  | 0.27 | 0.54 | 3429.61 |
| 2017 | Canada | Elora | 1251 | 70  | 2 | 15 | 0.61 | 0.63 | 0.56 | 0.42 | 0.33 | 0.54 | 1251.21 |
| 2017 | Canada | Elora | 1253 | 198 | 2 | 15 | 0.62 | 0.62 | 0.61 | 0.59 | 0.37 | 0.45 | 2466.41 |
| 2017 | Canada | Elora | 1254 | 73  | 2 | 15 | 0.65 | 0.7  | 0.57 | 0.5  | 0.34 | 0.53 | 1083.21 |
| 2017 | Canada | Elora | 1255 | 231 | 2 | 15 | 0.54 | 0.51 | 0.51 | 0.41 | 0.25 | 0.57 | 3334.41 |
| 2017 | Canada | Elora | 1256 | 180 | 2 | 15 | 0.5  | 0.54 | 0.48 | 0.45 | 0.3  | 0.49 | 2788.46 |
| 2017 | Canada | Elora | 1257 | 27  | 2 | 15 | 0.62 | 0.62 | 0.48 | 0.35 | 0.3  | 0.57 | 3855.21 |
| 2017 | Canada | Elora | 1258 | 223 | 2 | 15 | 0.59 | 0.57 | 0.52 | 0.49 | 0.23 | 0.52 | 2536.46 |
| 2017 | Canada | Elora | 1259 | 163 | 2 | 15 | 0.57 | 0.57 | 0.48 | 0.45 | 0.27 | 0.54 | 1175.66 |
| 2017 | Canada | Elora | 1260 | 215 | 2 | 15 | 0.6  | 0.59 | 0.63 | 0.56 | 0.3  | 0.52 | 3642.41 |
| 2017 | Canada | Elora | 1261 | 141 | 2 | 16 | 0.59 | 0.6  | 0.54 | 0.55 | 0.29 | 0.46 | 2712.81 |
| 2017 | Canada | Elora | 1262 | 128 | 2 | 16 | 0.68 | 0.63 | 0.54 | 0.5  | 0.29 | 0.53 | 5602.41 |
| 2017 | Canada | Elora | 1263 | 316 | 2 | 16 | 0.65 | 0.67 | 0.62 | 0.57 | 0.36 | 0.47 | 3418.41 |
| 2017 | Canada | Elora | 1264 | 10  | 2 | 16 | 0.58 | 0.59 | 0.65 | 0.5  | 0.27 | 0.51 | 1744.01 |
| 2017 | Canada | Elora | 1265 | 257 | 2 | 16 | 0.65 | 0.6  | 0.61 | 0.64 | 0.29 | 0.47 | 1186.86 |
| 2017 | Canada | Elora | 1266 | 280 | 2 | 16 | 0.64 | 0.67 | 0.59 | 0.53 | 0.24 | 0.45 | 3776.81 |
| 2017 | Canada | Elora | 1267 | 120 | 2 | 16 | 0.62 | 0.62 | 0.55 | 0.43 | 0.37 | 0.54 | 3401.61 |
| 2017 | Canada | Elora | 1268 | 230 | 2 | 16 | 0.68 | 0.71 | 0.61 | 0.48 | 0.4  | 0.51 | 2735.21 |
| 2017 | Canada | Elora | 1269 | 304 | 2 | 16 | 0.5  | 0.64 | 0.62 | 0.54 | 0.4  | 0.47 | 4611.21 |
| 2017 | Canada | Elora | 1270 | 174 | 2 | 16 | 0.69 | 0.7  | 0.67 | 0.6  | 0.29 | 0.46 | 1489.26 |
| 2017 | Canada | Elora | 1271 | 100 | 2 | 16 | 0.61 | 0.66 | 0.61 | 0.54 | 0.34 | 0.51 | 1998.86 |
| 2017 | Canada | Elora | 1272 | 285 | 2 | 16 | 0.66 | 0.67 | 0.67 | 0.63 | 0.26 | 0.49 | 2393.61 |
| 2017 | Canada | Elora | 1273 | 15  | 2 | 16 | 0.63 | 0.72 | 0.67 | 0.59 | 0.24 | 0.52 | 691.21  |
| 2017 | Canada | Elora | 1274 | 165 | 2 | 16 | 0.74 | 0.74 | 0.67 | 0.6  | 0.27 | 0.55 | 2466.41 |
| 2017 | Canada | Elora | 1275 | 169 | 2 | 16 | 0.6  | 0.64 | 0.61 | 0.51 | 0.36 | 0.50 | 3407.21 |
| 2017 | Canada | Elora | 1276 | 14  | 2 | 16 | 0.73 | 0.71 | 0.61 | 0.51 | 0.29 | 0.51 | 1480.81 |
| 2017 | Canada | Elora | 1277 | 266 | 2 | 16 | 0.59 | 0.63 | 0.57 | 0.53 | 0.32 | 0.49 | 3911.21 |
| 2017 | Canada | Elora | 1278 | 242 | 2 | 16 | 0.59 | 0.6  | 0.62 | 0.56 | 0.31 | 0.50 | 2433.72 |
| 2017 | Canada | Elora | 1279 | 166 | 2 | 16 | 0.56 | 0.53 | 0.54 | 0.37 | 0.25 | 0.51 | 1057.72 |
| 2017 | Canada | Elora | 1280 | 104 | 2 | 16 | 0.58 | 0.6  | 0.61 | 0.59 | 0.36 | 0.48 | 2793.72 |
