# Supplementary material
Source: MDPI journal article supplement (https://www.mdpi.com/2073-4395/11/3/486)
Supplement: s1 [file s1]

**Manuscript title:**

Does Leaf Waxiness Confound the Use of NDVI in the Assessment of Chlorophyll When Evaluating Genetic Diversity Panels of Wheat?

**Journal:**

Agronomy (MDPI)

**Authors:**

Kamal Khadka<sup>1,\*</sup>, Andrew J. Burt<sup>2</sup>, Hugh J. Earl<sup>1</sup>, Manish N. Raizada<sup>1</sup>, Alireza Navabi<sup>1</sup>

**Affiliation:**

<sup>\*1</sup> Department of Plant Agriculture, University of Guelph, Guelph, Ontario, Canada, N1G 2W1

**Corresponding author email address:**

[kamal.khadka011@gmail.com](mailto:kamal.khadka011@gmail.com)

**Supplementary Material Table S6:** Correlation between grain yield and NDVI-related traits in separate analysis using data from 2016 and 2017 field season at Elora Research Station, Canada.

|                  | NDVI1             | NDVI2              | NDVI3              | NDVI4              | NDVI5              |
|------------------|-------------------|--------------------|--------------------|--------------------|--------------------|
| <b>2016 data</b> |                   |                    |                    |                    |                    |
| <b>NDVI2</b>     | 0.79986<br><.0001 |                    |                    |                    |                    |
| <b>NDVI3</b>     | 0.65516<br><.0001 | 0.79171<br><.0001  |                    |                    |                    |
| <b>NDVI4</b>     | 0.30856<br><.0001 | 0.47185<br><.0001  | 0.6968<br><.0001   |                    |                    |
| <b>NDVI5</b>     | 0.26668<br><.0001 | 0.36417<br><.0001  | 0.51552<br><.0001  | 0.70939<br><.0001  |                    |
| <b>GY</b>        | 0.07494<br>0.0589 | 0.14591<br>0.0002  | 0.17153<br><.0001  | -0.07056<br>0.0754 | -0.26101<br><.0001 |
| <b>2017 data</b> |                   |                    |                    |                    |                    |
| <b>NDVI2</b>     | 0.75424<br><.0001 |                    |                    |                    |                    |
| <b>NDVI3</b>     | 0.53809<br><.0001 | 0.64911<br><.0001  |                    |                    |                    |
| <b>NDVI4</b>     | 0.3522<br><.0001  | 0.47482<br><.0001  | 0.73399<br><.0001  |                    |                    |
| <b>NDVI5</b>     | 0.12194<br>0.0021 | 0.16414<br><.0001  | 0.315<br><.0001    | 0.34827<br><.0001  |                    |
| <b>GY</b>        | -0.12997<br>0.001 | -0.09355<br>0.0183 | -0.03068<br>0.4399 | 0.02243<br>0.5723  | 0.05336<br>0.1789  |

Abbreviations: GY= Grain yield, NDVI= Normalized difference vegetative index.
