# Supplementary material
Source: MDPI journal article supplement (https://www.mdpi.com/2073-4395/11/3/486)
Supplement: s1 [file s1]

**Manuscript title:**

Does Leaf Waxiness Confound the Use of NDVI in the Assessment of Chlorophyll When Evaluating Genetic Diversity Panels of Wheat?

**Journal:**

Agronomy (MDPI)

**Authors:**

Kamal Khadka<sup>1,\*</sup>, Andrew J. Burt<sup>2</sup>, Hugh J. Earl<sup>1</sup>, Manish N. Raizada<sup>1</sup>, Alireza Navabi<sup>1</sup>

**Affiliation:**

<sup>\*1</sup> Department of Plant Agriculture, University of Guelph, Guelph, Ontario, Canada, N1G 2W1

**Corresponding author email address:**

[kamal.khadka011@gmail.com](mailto:kamal.khadka011@gmail.com)

**Supplementary material Table S3.** Summary of weather data for the four field experiments conducted in Nepal and Canada during 2016 and 2017 wheat growing seasons.

| Location     | Year | Month    | Maximum temperature (°C) | Minimum temperature (°C) | Average temperature (°C) | Precipitation (mm) |
|--------------|------|----------|--------------------------|--------------------------|--------------------------|--------------------|
| <b>Elora</b> | 2016 | May      | 18.9                     | 6.3                      | 12.6                     | 57.3               |
|              | 2016 | June     | 24.1                     | 10.0                     | 16.9                     | 53.0               |
|              | 2016 | July     | 26.8                     | 13.3                     | 20.1                     | 102.4              |
|              | 2016 | August   | 26.8                     | 14.1                     | 20.4                     | 152.6              |
| <b>Elora</b> | 2017 | May      | 14.9                     | 5.7                      | 10.0                     | 120.5              |
|              | 2017 | June     | 22.7                     | 11.9                     | 17.4                     | 117.8              |
|              | 2017 | July     | 24.2                     | 13.2                     | 18.7                     | 35.6               |
|              | 2017 | August   | 23.1                     | 10.8                     | 16.9                     | 68.1               |
| <b>ABD</b>   | 2016 | November | 22.2                     | 10.7                     | 16.5                     | 0.0                |
|              | 2016 | December | 20.7                     | 8.9                      | 14.8                     | 0.0                |
|              | 2017 | January  | 19.7                     | 4.01                     | 11.9                     | 14.4               |
|              | 2017 | February | 22.0                     | 5.9                      | 14.0                     | 0.0                |
|              | 2017 | March    | 22.4                     | 9.0                      | 15.7                     | 47.4               |
|              | 2017 | April    | 26.9                     | 13.1                     | 20.0                     | 87.6               |
|              | 2017 | May      | 27.6                     | 16.3                     | 22.0                     | 148.6              |
| <b>NWRP</b>  | 2016 | November | 30.4                     | 14.4                     | 22.4                     | 0.0                |
|              | 2016 | December | 23.1                     | 12.2                     | 17.7                     | 0.5                |
|              | 2017 | January  | 22.4                     | 9.1                      | 15.8                     | 14.8               |
|              | 2017 | February | 26.2                     | 11.4                     | 18.8                     | 0.0                |
|              | 2017 | March    | 30.6                     | 15.0                     | 22.8                     | 48.2               |
|              | 2017 | April    | 36.3                     | 21.1                     | 28.7                     | 3.5                |
