# Supplementary material
Source: MDPI journal article supplement (https://www.mdpi.com/2073-4395/11/3/486)
Supplement: s1 [file s1]

**Manuscript title:**

Does Leaf Waxiness Confound the Use of NDVI in the Assessment of Chlorophyll When Evaluating Genetic Diversity Panels of Wheat?

**Journal:**

Agronomy (MDPI)

**Authors:**

Kamal Khadka<sup>1,\*</sup>, Andrew J. Burt<sup>2</sup>, Hugh J. Earl<sup>1</sup>, Manish N. Raizada<sup>1</sup>, Alireza Navabi<sup>1</sup>

**Affiliation:**

<sup>\*1</sup> Department of Plant Agriculture, University of Guelph, Guelph, Ontario, Canada, N1G 2W1

**Corresponding author email address:**

[kamal.khadka011@gmail.com](mailto:kamal.khadka011@gmail.com)

**Supplementary material Table S4.** Pearson correlation of NDVI values and AUNC with grain yield.

|               | AUNC               | GY                 | NDVI1             | NDVI11            | NDVI3              | NDVI4              | NDVI5              |
|---------------|--------------------|--------------------|-------------------|-------------------|--------------------|--------------------|--------------------|
| <b>GY</b>     | -0.00094<br>0.9867 |                    |                   |                   |                    |                    |                    |
| <b>NDVI1</b>  | 0.55343<br><.0001  | -0.12476<br>0.0261 |                   |                   |                    |                    |                    |
| <b>NDVI11</b> | 0.75542<br><.0001  | -0.1156<br>0.0394  | 0.74474<br><.0001 |                   |                    |                    |                    |
| <b>NDVI3</b>  | 0.8878<br><.0001   | 0.03<br>0.5941     | 0.3164<br><.0001  | 0.51548<br><.0001 |                    |                    |                    |
| <b>NDVI4</b>  | 0.84906<br><.0001  | 0.06898<br>0.2199  | 0.19954<br>0.0003 | 0.41421<br><.0001 | 0.77071<br><.0001  |                    |                    |
| <b>NDVI5</b>  | 0.50557<br><.0001  | 0.0472<br>0.4015   | 0.13917<br>0.013  | 0.20462<br>0.0002 | 0.37866<br><.0001  | 0.38032<br><.0001  |                    |
| <b>NDVIDr</b> | -0.18493<br>0.0009 | -0.04832<br>0.3905 | 0.09345<br>0.0962 | 0.06841<br>0.2238 | -0.26638<br><.0001 | -0.23937<br><.0001 | -0.20379<br>0.0003 |

Abbreviations: GY= Grain yield, NDVI= Normalized difference vegetative index, AUNC= Area under NDVI curve.
