# Supplementary material
Source: MDPI journal article supplement (https://www.mdpi.com/2073-4395/11/3/486)
Supplement: s1 [file s1]

**Manuscript title:**

Does Leaf Waxiness Confound the Use of NDVI in the Assessment of Chlorophyll When Evaluating Genetic Diversity Panels of Wheat?

**Journal:**

Agronomy (MDPI)

**Authors:**

Kamal Khadka<sup>1,\*</sup>, Andrew J. Burt<sup>2</sup>, Hugh J. Earl<sup>1</sup>, Manish N. Raizada<sup>1</sup>, Alireza Navabi<sup>1</sup>

**Affiliation:**

<sup>\*1</sup> Department of Plant Agriculture, University of Guelph, Guelph, Ontario, Canada, N1G 2W1

**Corresponding author email address:**

[kamal.khadka011@gmail.com](mailto:kamal.khadka011@gmail.com)

**Supplementary material Table S2.** Analysis of variance for 318 genotypes belonging to the NWDP for phenotypic traits evaluated at four different field experiments conducted in 2016 and 2017.

|                            | <b>AUNC</b>           | <b>NDVIdr</b>         | <b>AUSC</b>           | <b>Waxiness</b>       | <b>Grain yield</b>    |
|----------------------------|-----------------------|-----------------------|-----------------------|-----------------------|-----------------------|
|                            | <b><i>F</i>-value</b> | <b><i>F</i>-value</b> | <b><i>F</i>-value</b> | <b><i>F</i>-value</b> | <b><i>F</i>-value</b> |
| <b>Fixed effect</b>        |                       |                       |                       |                       |                       |
| Entry                      | 0.98*                 | 4.57***               | 2.68***               | 6.38***               | 2.42***               |
|                            | Estimate              | Estimate              | Estimate              | Estimate              | Estimate              |
| <b>Random effects</b>      |                       |                       |                       |                       |                       |
| Location                   | 8.68**                | -                     | 52792*                | 0.61***               | 945946***             |
| Block (location)           | 0.53                  | 0                     | 62.39**               | 0.16                  | 0                     |
| iBlock<br>(location*block) | 0.53***               | 46902                 | 142.31***             | 0.22***               | 81618***              |
| Entry*location             | 0.55***               | -                     | 2602.87***            | 1.19***               | 235854***             |
| Residual                   | 0.76***               | 15650                 | 2048.46***            | 0.96***               | 619950***             |

Significance: \*P≤0.05, \*\*P≤0.001, \*\*\*P≤0.0001.

Abbreviations: AUNC=Area under NDVI curve, AUSC=Area under SPAD curve, NDVIdr=NDVI derived from UAV/drone data.
