# Supplementary material
Source: MDPI journal article supplement (https://www.mdpi.com/2073-4395/11/3/486)
Supplement: s1 [file s1]

**Manuscript title:**

Does Leaf Waxiness Confound the Use of NDVI in the Assessment of Chlorophyll When Evaluating Genetic Diversity Panels of Wheat?

**Journal:**

Agronomy (MDPI)

**Authors:**

Kamal Khadka<sup>1,\*</sup>, Andrew J. Burt<sup>2</sup>, Hugh J. Earl<sup>1</sup>, Manish N. Raizada<sup>1</sup>, Alireza Navabi<sup>1</sup>

**Affiliation:**

<sup>\*1</sup> Department of Plant Agriculture, University of Guelph, Guelph, Ontario, Canada, N1G 2W1

**Corresponding author email address:**

[kamal.khadka011@gmail.com](mailto:kamal.khadka011@gmail.com)

**Supplementary material Table S1.** List of the genotypes in the Nepali Wheat Diversity Panel included in this study.

| Entry | Accessions | Pedigree       | Source      | Remarks     |
|-------|------------|----------------|-------------|-------------|
| 1     | NGRC 00176 | Local landrace | NAGRC NEPAL | Achham      |
| 2     | NGRC 00177 | Local landrace | NAGRC NEPAL | Achham      |
| 3     | NGRC 00179 | Local landrace | NAGRC NEPAL | Achham      |
| 4     | NGRC 00180 | Local landrace | NAGRC NEPAL | Achham      |
| 5     | NGRC 00181 | Local landrace | NAGRC NEPAL | Bajura      |
| 6     | NGRC 00199 | Local landrace | NAGRC NEPAL | Gulmi       |
| 7     | NGRC 00202 | Local landrace | NAGRC NEPAL | Baitadi     |
| 8     | NGRC 00204 | Local landrace | NAGRC NEPAL | Dandeldhura |
| 9     | NGRC 00205 | Local landrace | NAGRC NEPAL | Dandeldhura |
| 10    | NGRC 02448 | Local landrace | NAGRC NEPAL | Dandeldhura |
| 11    | NGRC 02449 | Local landrace | NAGRC NEPAL | Baglung     |
| 12    | NGRC 02450 | Local landrace | NAGRC NEPAL | Baglung     |
| 13    | NGRC 02451 | Local landrace | NAGRC NEPAL | Gorkha      |
| 14    | NGRC 02452 | Local landrace | NAGRC NEPAL | Solukhumbu  |
| 15    | NGRC 02455 | Local landrace | NAGRC NEPAL | Solukhumbu  |

| Entry | Accessions | Pedigree       | Source      | Remarks     |
|-------|------------|----------------|-------------|-------------|
| 16    | NGRC 02456 | Local landrace | NAGRC NEPAL | Khotang     |
| 17    | NGRC 02457 | Local landrace | NAGRC NEPAL | Baglung     |
| 18    | NGRC 02458 | Local landrace | NAGRC NEPAL | Myagdi      |
| 19    | NGRC 02459 | Local landrace | NAGRC NEPAL | Mustang     |
| 20    | NGRC 02460 | Local landrace | NAGRC NEPAL | Manang      |
| 21    | NGRC 02461 | Local landrace | NAGRC NEPAL | Manang      |
| 22    | NGRC 02462 | Local landrace | NAGRC NEPAL | Manang      |
| 23    | NGRC 02465 | Local landrace | NAGRC NEPAL | Mugu        |
| 24    | NGRC 02466 | Local landrace | NAGRC NEPAL | Mugu        |
| 25    | NGRC 02467 | Local landrace | NAGRC NEPAL | Kalikot     |
| 26    | NGRC 02470 | Local landrace | NAGRC NEPAL | Dandeldhura |
| 27    | NGRC 02471 | Local landrace | NAGRC NEPAL | Jumla       |
| 28    | NGRC 02472 | Local landrace | NAGRC NEPAL | Darchula    |
| 29    | NGRC 02496 | Local landrace | NAGRC NEPAL | Darchula    |
| 30    | NGRC 02544 | Local landrace | NAGRC NEPAL | Rolpa       |
| 31    | NGRC 02546 | Local landrace | NAGRC NEPAL | Sallyan     |
| 32    | NGRC 02547 | Local landrace | NAGRC NEPAL | Rukum       |
| 33    | NGRC 02548 | Local landrace | NAGRC NEPAL | Sallyan     |
| 34    | NGRC 02549 | Local landrace | NAGRC NEPAL | Rukum       |
| 35    | NGRC 02550 | Local landrace | NAGRC NEPAL | Sallyan     |
| 36    | NGRC 02551 | Local landrace | NAGRC NEPAL | Sallyan     |
| 37    | NGRC 02552 | Local landrace | NAGRC NEPAL | Sallyan     |
| 38    | NGRC 02553 | Local landrace | NAGRC NEPAL | Rukum       |
| 39    | NGRC 02554 | Local landrace | NAGRC NEPAL | Bajhang     |
| 40    | NGRC 02556 | Local landrace | NAGRC NEPAL | Mustang     |
| 41    | NGRC 02557 | Local landrace | NAGRC NEPAL | Mustang     |
| 42    | NGRC 02558 | Local landrace | NAGRC NEPAL | Mustang     |
| 43    | NGRC 02559 | Local landrace | NAGRC NEPAL | Mustang     |
| 44    | NGRC 02560 | Local landrace | NAGRC NEPAL | Baglung     |
| 45    | NGRC 02561 | Local landrace | NAGRC NEPAL | Baitadi     |
| 46    | NGRC 02563 | Local landrace | NAGRC NEPAL | Darchula    |
| 47    | NGRC 02564 | Local landrace | NAGRC NEPAL | Darchula    |

| Entry | Accessions | Pedigree       | Source      | Remarks     |
|-------|------------|----------------|-------------|-------------|
| 48    | NGRC 02565 | Local landrace | NAGRC NEPAL | Bajura      |
| 49    | NGRC 02566 | Local landrace | NAGRC NEPAL | Bajura      |
| 50    | NGRC 02567 | Local landrace | NAGRC NEPAL | Bajura      |
| 51    | NGRC 02568 | Local landrace | NAGRC NEPAL | Bajura      |
| 52    | NGRC 02569 | Local landrace | NAGRC NEPAL | Bajura      |
| 53    | NGRC 02570 | Local landrace | NAGRC NEPAL | Bajhang     |
| 54    | NGRC 02571 | Local landrace | NAGRC NEPAL | Bajhang     |
| 55    | NGRC 02572 | Local landrace | NAGRC NEPAL | Bajhang     |
| 56    | NGRC 02574 | Local landrace | NAGRC NEPAL | Jajarkot    |
| 57    | NGRC 02575 | Local landrace | NAGRC NEPAL | Dandeldhura |
| 58    | NGRC 02576 | Local landrace | NAGRC NEPAL | Dandeldhura |
| 59    | NGRC 02578 | Local landrace | NAGRC NEPAL | Dandeldhura |
| 60    | NGRC 02579 | Local landrace | NAGRC NEPAL | Dandeldhura |
| 61    | NGRC 02580 | Local landrace | NAGRC NEPAL | Dandeldhura |
| 62    | NGRC 02581 | Local landrace | NAGRC NEPAL | Dandeldhura |
| 63    | NGRC 02582 | Local landrace | NAGRC NEPAL | Dandeldhura |
| 64    | NGRC 02584 | Local landrace | NAGRC NEPAL | Taplejung   |
| 65    | NGRC 02585 | Local landrace | NAGRC NEPAL | Doti        |
| 66    | NGRC 02586 | Local landrace | NAGRC NEPAL | Baitadi     |
| 67    | NGRC 02587 | Local landrace | NAGRC NEPAL | Baitadi     |
| 68    | NGRC 02589 | Local landrace | NAGRC NEPAL | Baitadi     |
| 69    | NGRC 02590 | Local landrace | NAGRC NEPAL | Baitadi     |
| 70    | NGRC 02591 | Local landrace | NAGRC NEPAL | Darchula    |
| 71    | NGRC 02593 | Local landrace | NAGRC NEPAL | Dandeldhura |
| 72    | NGRC 02594 | Local landrace | NAGRC NEPAL | Dandeldhura |
| 73    | NGRC 02595 | Local landrace | NAGRC NEPAL | Doti        |
| 74    | NGRC 02596 | Local landrace | NAGRC NEPAL | Doti        |
| 75    | NGRC 02599 | Local landrace | NAGRC NEPAL | Dolakha     |
| 76    | NGRC 02602 | Local landrace | NAGRC NEPAL | Kanchanpur  |
| 77    | NGRC 02603 | Local landrace | NAGRC NEPAL | Doti        |
| 78    | NGRC 02604 | Local landrace | NAGRC NEPAL | Dadeldhura  |
| 79    | NGRC 02605 | Local landrace | NAGRC NEPAL | Baitadi     |

| Entry | Accessions | Pedigree       | Source      | Remarks    |
|-------|------------|----------------|-------------|------------|
| 80    | NGRC 02606 | Local landrace | NAGRC NEPAL | Baitadi    |
| 81    | NGRC 02607 | Local landrace | NAGRC NEPAL | Baitadi    |
| 82    | NGRC 02608 | Local landrace | NAGRC NEPAL | Dadeldhura |
| 83    | NGRC 02609 | Local landrace | NAGRC NEPAL | Baitadi    |
| 84    | NGRC 02610 | Local landrace | NAGRC NEPAL | Dolkha     |
| 85    | NGRC 02611 | Local landrace | NAGRC NEPAL | Dolkha     |
| 86    | NGRC 02612 | Local landrace | NAGRC NEPAL | Dolkha     |
| 87    | NGRC 02613 | Local landrace | NAGRC NEPAL | Dolkha     |
| 88    | NGRC 02614 | Local landrace | NAGRC NEPAL | Dolkha     |
| 89    | NGRC 02615 | Local landrace | NAGRC NEPAL | Dolkha     |
| 90    | NGRC 02617 | Local landrace | NAGRC NEPAL | Dolkha     |
| 91    | NGRC 02619 | Local landrace | NAGRC NEPAL | Dolkha     |
| 92    | NGRC 02620 | Local landrace | NAGRC NEPAL | Dolkha     |
| 93    | NGRC 02621 | Local landrace | NAGRC NEPAL | Rasuwa     |
| 94    | NGRC 02622 | Local landrace | NAGRC NEPAL | Dolkha     |
| 95    | NGRC 02623 | Local landrace | NAGRC NEPAL | Dolkha     |
| 96    | NGRC 02624 | Local landrace | NAGRC NEPAL | Dolpa      |
| 97    | NGRC 02625 | Local landrace | NAGRC NEPAL | Dolkha     |
| 98    | NGRC 02629 | Local landrace | NAGRC NEPAL | Dolkha     |
| 99    | NGRC 02630 | Local landrace | NAGRC NEPAL | Dolkha     |
| 100   | NGRC 02631 | Local landrace | NAGRC NEPAL | Rasuwa     |
| 101   | NGRC 02632 | Local landrace | NAGRC NEPAL | Nuwakot    |
| 102   | NGRC 02633 | Local landrace | NAGRC NEPAL | Nuwakot    |
| 103   | NGRC 04399 | Local landrace | NAGRC NEPAL | Ramechhap  |
| 104   | NGRC 04400 | Local landrace | NAGRC NEPAL | Ramechhap  |
| 105   | NGRC 04401 | Local landrace | NAGRC NEPAL | Ramechhap  |
| 106   | NGRC 04402 | Local landrace | NAGRC NEPAL | Ramechhap  |
| 107   | NGRC 04404 | Local landrace | NAGRC NEPAL | Ramechhap  |
| 108   | NGRC 04405 | Local landrace | NAGRC NEPAL | Ramechhap  |
| 109   | NGRC 04406 | Local landrace | NAGRC NEPAL | Ramechhap  |
| 110   | NGRC 04408 | Local landrace | NAGRC NEPAL | Ramechhap  |
| 111   | NGRC 04409 | Local landrace | NAGRC NEPAL | Salyan     |

| <b>Entry</b> | <b>Accessions</b> | <b>Pedigree</b> | <b>Source</b> | <b>Remarks</b> |
|--------------|-------------------|-----------------|---------------|----------------|
| 112          | NGRC 04410        | Local landrace  | NAGRC NEPAL   | Myagdi         |
| 113          | NGRC 04413        | Local landrace  | NAGRC NEPAL   | Kavreplanchok  |
| 114          | NGRC 04414        | Local landrace  | NAGRC NEPAL   | Kavreplanchok  |
| 115          | NGRC 04416        | Local landrace  | NAGRC NEPAL   | Salyan         |
| 116          | NGRC 04417        | Local landrace  | NAGRC NEPAL   | Salyan         |
| 117          | NGRC 04418        | Local landrace  | NAGRC NEPAL   | Salyan         |
| 118          | NGRC 04419        | Local landrace  | NAGRC NEPAL   | Salyan         |
| 119          | NGRC 04421        | Local landrace  | NAGRC NEPAL   | Salyan         |
| 120          | NGRC 04422        | Local landrace  | NAGRC NEPAL   | Surkhet        |
| 121          | NGRC 04423        | Local landrace  | NAGRC NEPAL   | Surkhet        |
| 122          | NGRC 04424        | Local landrace  | NAGRC NEPAL   | Ramechhap      |
| 123          | NGRC 04425        | Local landrace  | NAGRC NEPAL   | Surkhet        |
| 124          | NGRC 04426        | Local landrace  | NAGRC NEPAL   | Surkhet        |
| 125          | NGRC 04427        | Local landrace  | NAGRC NEPAL   | Surkhet        |
| 126          | NGRC 04428        | Local landrace  | NAGRC NEPAL   | Dolakha        |
| 127          | NGRC 04429        | Local landrace  | NAGRC NEPAL   | Dolakha        |
| 128          | NGRC 04430        | Local landrace  | NAGRC NEPAL   | Dolakha        |
| 129          | NGRC 04431        | Local landrace  | NAGRC NEPAL   | Dolakha        |
| 130          | NGRC 04432        | Local landrace  | NAGRC NEPAL   | Dolakha        |
| 131          | NGRC 04433        | Local landrace  | NAGRC NEPAL   | Dolakha        |
| 132          | NGRC 04434        | Local landrace  | NAGRC NEPAL   | Dolakha        |
| 133          | NGRC 04436        | Local landrace  | NAGRC NEPAL   | Dolakha        |
| 134          | NGRC 04437        | Local landrace  | NAGRC NEPAL   | Dolakha        |
| 135          | NGRC 04439        | Local landrace  | NAGRC NEPAL   | Dolakha        |
| 136          | NGRC 04440        | Local landrace  | NAGRC NEPAL   | Dolakha        |
| 137          | NGRC 04443        | Local landrace  | NAGRC NEPAL   | Kavreplanchok  |
| 138          | NGRC 04444        | Local landrace  | NAGRC NEPAL   | Kavreplanchok  |
| 139          | NGRC 04445        | Local landrace  | NAGRC NEPAL   | Kavreplanchok  |
| 140          | NGRC 04446        | Local landrace  | NAGRC NEPAL   | Kavreplanchok  |
| 141          | NGRC 04447        | Local landrace  | NAGRC NEPAL   | Kavreplanchok  |
| 142          | NGRC 04448        | Local landrace  | NAGRC NEPAL   | Surkhet        |
| 143          | NGRC 04449        | Local landrace  | NAGRC NEPAL   | Surkhet        |

| Entry | Accessions | Pedigree                     | Source      | Remarks          |
|-------|------------|------------------------------|-------------|------------------|
| 144   | NGRC 04450 | Local landrace               | NAGRC NEPAL | Surkhet          |
| 145   | NGRC 04451 | Local landrace               | NAGRC NEPAL | Dailekh          |
| 146   | NGRC 04452 | Local landrace               | NAGRC NEPAL | Dailekh          |
| 147   | NGRC 04453 | Local landrace               | NAGRC NEPAL | Dailekh          |
| 148   | NGRC 04454 | Local landrace               | NAGRC NEPAL | Dailekh          |
| 149   | NGRC 04455 | Local landrace               | NAGRC NEPAL | Dailekh          |
| 150   | NGRC 04456 | Local landrace               | NAGRC NEPAL | Dailekh          |
| 151   | NGRC 04457 | Local landrace               | NAGRC NEPAL | Dailekh          |
| 152   | NGRC 04458 | Local landrace               | NAGRC NEPAL | Dailekh          |
| 153   | NGRC 04459 | Local landrace               | NAGRC NEPAL | Dailekh          |
| 154   | NGRC 04460 | Local landrace               | NAGRC NEPAL | Dailekh          |
| 155   | NGRC 04461 | Local landrace               | NAGRC NEPAL | Dailekh          |
| 156   | NGRC 04462 | Local landrace               | NAGRC NEPAL | Dailekh          |
| 157   | NGRC 04463 | Local landrace               | NAGRC NEPAL | Dailekh          |
| 158   | NGRC 04464 | Local landrace               | NAGRC NEPAL | Dailekh          |
| 159   | NGRC 04465 | Local landrace               | NAGRC NEPAL | Dailekh          |
| 160   | NGRC 04466 | Local landrace               | NAGRC NEPAL | Dailekh          |
| 161   | NGRC 04467 | Local landrace               | NAGRC NEPAL | Dailekh          |
| 163   | NGRC 04470 | Local landrace               | NAGRC NEPAL | Dailekh          |
| 164   | NGRC 04471 | Local landrace               | NAGRC NEPAL | Dailekh          |
| 165   | NGRC 04472 | Local landrace               | NAGRC NEPAL | Dailekh          |
| 166   | NGRC 04473 | Local landrace               | NAGRC NEPAL | Dailekh          |
| 167   | NGRC 04474 | Local landrace               | NAGRC NEPAL | Mugu             |
| 168   | Lerma 52   | MENTANA/KENYA 324            | NWRP NEPAL  | Released variety |
| 169   | Kalyansona | PJ"S"/GB55 (S227)            | NWRP NEPAL  | Released variety |
| 170   | Pitic 62   | YT54/N10B126.IC              | NWRP NEPAL  | Released variety |
| 171   | RR21       | 1154-388/AN/3/YT54/NIOB/RL64 | NWRP NEPAL  | Released variety |
| 172   | NL 30      | HD832-5-5-OY/RB              | NWRP NEPAL  | Released variety |
| 173   | UP 262     | S308/BAJIO-66                | NWRP NEPAL  | Released variety |
| 174   | Lumbini    | E4871/PJ62                   | NWRP NEPAL  | Released variety |
| 175   | Tribeni    | HD1963/HD1931                | NWRP NEPAL  | Released variety |
| 176   | Vinayak    | LC55                         | NWRP NEPAL  | Released variety |

| Entry | Accessions           | Pedigree                      | Source                                                                          | Remarks          |
|-------|----------------------|-------------------------------|---------------------------------------------------------------------------------|------------------|
| 177   | Siddhartha           | HD2092/HD1982//E4870/K65      | NWRP NEPAL                                                                      | Released variety |
| 178   | Vaskar               | TZPP/PL//7C                   | NWRP NEPAL                                                                      | Released variety |
| 179   | Nepal 297            | HD2173/HD2186//HD2160         | NWRP NEPAL                                                                      | Released variety |
| 180   | NL 251               | WH147/HD2160//WH147           | NWRP NEPAL                                                                      | Released variety |
| 181   | Annapurna 1          | KBZ/BUHO//KAL/BB=(VEE"S")     | NWRP NEPAL                                                                      | Released variety |
| 182   | Annapurna 2          | NPO/TOB"S"//8156/3/KAL/BB     | NWRP NEPAL                                                                      | Released variety |
| 183   | Annapurna 3          | KBZ/BUHO//KAL/BB=(VEE"S")     | NWRP NEPAL                                                                      | Released variety |
| 184   | BL 1022              | PVN/BUC                       | NWRP NEPAL                                                                      | Released variety |
| 185   | Bhrikuti             | CMT/COC75/3/PLO//FURY/ANA75   | NWRP NEPAL                                                                      | Released variety |
| 186   | BL 1135              | QTZ/TAN"S"                    | NWRP NEPAL                                                                      | Released variety |
| 187   | Annapurna 4          | KBZ/3/CC/INIA//CNO/ELGAU/SN64 | NWRP NEPAL                                                                      | Released variety |
| 188   | Achyut               | CPAN168/HD2204                | NWRP NEPAL                                                                      | Released variety |
| 189   | Rohini               | PRL"S"/TONI//CHIL"S"          | NWRP NEPAL                                                                      | Released variety |
| 190   | Kanti                | LIRA/FUFAN17//VEE#5"S"        | NWRP NEPAL                                                                      | Released variety |
| 191   | Pasang Lhamu         | PGO/SERI                      | NWRP NEPAL                                                                      | Released variety |
| 192   | BL 1473              | NL297/NL352                   | NWRP NEPAL                                                                      | Released variety |
| 193   | Gautam               | SIDDHARTH/NING8319/NL297      | NWRP NEPAL                                                                      | Released variety |
| 194   | WK1204               | SW89-3064/STAR                | NWRP NEPAL                                                                      | Released variety |
| 195   | NL 971               | MRNG/BUC//BLO/PVN/3/PJB81     | NWRP NEPAL                                                                      | Released variety |
| 196   | Aditya (BL 3264)     | GS348/NL746//NL748            | NWRP NEPAL                                                                      | Released variety |
| 197   | Vijay (BL 3063)      | NL 748/NL 736 (Ug99 Res.)     | NWRP NEPAL                                                                      | Released variety |
| 198   | Gaura (BL 3235)      | NL 872/NL 868                 | NWRP NEPAL                                                                      | Released variety |
| 199   | Dhaulagiri (BL 3503) | BL 1961/NL 867                | NWRP NEPAL                                                                      | Released variety |
| 200   | Danphe (NL 1064)     | KIRITATI//2*PBW65/2*SERI.1B   | NWRP NEPAL                                                                      | Released variety |
| 201   | Tilottama (NL 1073)  | WAXWING*2/VIVITSI             | NWRP NEPAL                                                                      | Released variety |
| 202   | BW30655              | PBW343                        | CM85836-4Y-0M-0Y-8M-0Y-0IND<br>CGSS97Y00034M-099TOPB-027Y-099M-099Y-099M-27Y-0B | CIMMYT<br>MEXICO |
| 203   | BW35623              | PRL/2*PASTOR                  |                                                                                 | CIMMYT<br>MEXICO |

| Entry | Accessions | Pedigree                                                     | Source                                           | Remarks          |
|-------|------------|--------------------------------------------------------------|--------------------------------------------------|------------------|
| 204   | BW43945    | MUNAL #1                                                     | CGSS01B00054T-099Y-099M-099M-099Y-099M-13Y-0B    | CIMMYT<br>MEXICO |
| 205   | BW45161    | BECARD                                                       | CGSS01B00063T-099Y-099M-099M-099Y-099M-18WGY-0B  | CIMMYT<br>MEXICO |
| 206   | BW43354    | SUPER 152                                                    | CGSS02Y00153S-099M-099Y-099M-46Y-0B              | CIMMYT<br>MEXICO |
| 207   | BW44829    | PFUNYE #1                                                    | CMSS02Y00615S-47Y-0M-099Y-4M-0WGY-0B             | CIMMYT<br>MEXICO |
| 208   | BW44908    | HUHW                                                         | CGSS03B00149S-099M-099Y-099M-5WGY-0B             | CIMMYT<br>MEXICO |
| 209   | BW45568    | TRCH*2/3/C80.1/3*QT4118//3*PASTOR                            | CGSS04Y00002T-099M-099Y-099ZTM-099Y-099M-8WGY-0B | CIMMYT<br>MEXICO |
| 210   | BW45152    | WHEAR//INQALAB 91*2/TUKURU                                   | CGSS04Y00076S-099Y-099M-099Y-099M-5WGY-0B        | CIMMYT<br>MEXICO |
| 211   | BW45573    | WHEAR/KRONSTAD F2004                                         | CGSS04Y00106S-099Y-099M-099Y-099M-13WGY-0B       | CIMMYT<br>MEXICO |
| 212   | BW45173    | WHEAR/SOKOLL<br>SHA7/VEE#5/5/VEE#8//JUP/BJY/3/F3.71          | CMSS04Y00201S-099Y-099ZTM-099Y-099M-11WGY-0B     | CIMMYT<br>MEXICO |
| 213   | BW45578    | /TRM/4/2*WEAVER/6/SKAUZ/PARUS//<br>PARUS                     | CMSS04Y01158S-099Y-099ZTM-099Y-099M-6WGY-0B      | CIMMYT<br>MEXICO |
| 214   | BW45590    | PFAU/SERI.1B//AMAD/3/INQALAB<br>91*2/KUKUNA/4/WBLL1*2/KURUKU | CGSS04B00024T-099Y-099ZTM-099Y-099M-26WGY-0B     | CIMMYT<br>MEXICO |



| Entry | Accessions | Pedigree                                                                               | Source                                                      | Remarks          |
|-------|------------|----------------------------------------------------------------------------------------|-------------------------------------------------------------|------------------|
| 215   | BW45592    | NELOKI<br>HUW234+LR34/PRINIA//INQALAB                                                  | CGSS04B00027T-099Y-<br>099ZTM-099Y-099M-<br>7WGY-0B         | CIMMYT<br>MEXICO |
| 216   | BW45593    | 91*2/KUKUNA/5/FRET2*2/4/SNI/TRAP#<br>1/3/KAUZ*2/TRAP//KAUZ                             | CGSS04B00034T-099Y-<br>099ZTM-099Y-099M-<br>9WGY-0B         | CIMMYT<br>MEXICO |
| 217   | BW45587    | SNB//CMH79A.955/3*CNO79/3/ATTILA/<br>4/CHEN/AEGILOPS SQUARROSA<br>(TAUS)//BCN/3/2*KAUZ | CMSS04M00060S-0Y-<br>099ZTM-099Y-099M-<br>2WGY-0B           | CIMMYT<br>MEXICO |
| 218   | BW45165    | KAUZ//ALTAR<br>84/AOS/3/PASTOR/4/MILAN/CUPE//SW<br>89.3064/5/KIRITATI                  | CMSS04M01386S-<br>0TOPY-099ZTM-099Y-<br>099M-2WGY-0B        | CIMMYT<br>MEXICO |
| 219   | BW45595    | MELON//FILIN/MILAN/3/FILIN                                                             | GRSS04B00010T-099Y-<br>099B-099Y-099M-6WGY-<br>0B           | CIMMYT<br>MEXICO |
| 220   | BW48132    | MARCHOUCH*4/SAADA/3/2*FRET2/K<br>UKUNA//FRET2                                          | CGSS05Y00206T-099M-<br>099Y-099M-099Y-<br>099ZTM-7WGY-0B    | CIMMYT<br>MEXICO |
| 221   | BW48133    | WAXWING/6/PVN//CAR422/ANA/5/BO<br>W/CROW//BUC/PVN/3/YR/4/TRAP#1                        | CGSS05Y00363S-0B-<br>099Y-099M-099NJ-099NJ-<br>6WGY-0B      | CIMMYT<br>MEXICO |
| 222   | BW48135    | ATTILA*2//CHIL/BUC*2/3/KUKUNA                                                          | CMSS05Y00671T-<br>099TOPM-099Y-099M-<br>099Y-099ZTM-2WGY-0B | CIMMYT<br>MEXICO |
| 223   | BW48136    | WBLL1/KUKUNA//TACUPETO<br>F2001/3/BAJ #1                                               | CMSS05B00053S-099Y-<br>099M-099Y-099ZTM-<br>19WGY-0B        | CIMMYT<br>MEXICO |
| 224   | BW48137    | WBLL1//UP2338*2/VIVITSI                                                                | CMSS05B00054S-099Y-<br>099M-099Y-099ZTM-<br>8WGY-0B         | CIMMYT<br>MEXICO |

| Entry | Accessions | Pedigree                                                                                               | Source                                                                                                       | Remarks                              |
|-------|------------|--------------------------------------------------------------------------------------------------------|--------------------------------------------------------------------------------------------------------------|--------------------------------------|
| 225   | BW48139    | FRET2*2/4/SNI/TRAP#1/3/KAUZ*2/TRA<br>P//KAUZ/5/PFAU/WEAVER//BRAMBLI<br>NG                              | CMSS05B00480S-099Y-<br>099M-099Y-099ZTM-<br>22WGY-0B<br>CMSS05B00574S-099Y-<br>099M-099Y-099ZTM-<br>10WGY-0B | CIMMYT<br>MEXICO<br>CIMMYT<br>MEXICO |
| 226   | BW48171    | TRCH//PRINIA/PASTOR                                                                                    | CMSS05B00579S-099Y-<br>099M-099Y-099ZTM-<br>10WGY-0B                                                         | CIMMYT<br>MEXICO                     |
| 227   | BW48140    | KAUZ//ALTAR<br>84/AOS/3/MILAN/KAUZ/4/SAUAL                                                             | CMSS05B00581S-099Y-<br>099M-099Y-099ZTM-<br>10WGY-0B                                                         | CIMMYT<br>MEXICO                     |
| 228   | BW48141    | KACHU/SAUAL                                                                                            | CMSS05B00663S-099Y-<br>099M-099Y-099ZTM-<br>13WGY-0B                                                         | CIMMYT<br>MEXICO                     |
| 229   | BW48144    | ATTILA/3*BCN//BAV92/3/TILHI/5/BAV<br>92/3/PRL/SARA//TSI/VEE#5/4/CROC_1/<br>AE.SQUARROSA (224)//2*OPATA | CGSS05B00121T-<br>099TOPY-099M-099NJ-<br>4WGY-0B                                                             | CIMMYT<br>MEXICO                     |
| 230   | BW48145    | ROLF07/YANAC//TACUPETO<br>F2001/BRAMBLING                                                              | CGSS05B00132T-<br>099TOPY-099M-099NJ-<br>6WGY-0B                                                             | CIMMYT<br>MEXICO                     |
| 231   | BW48148    | FRET2*2/4/SNI/TRAP#1/3/KAUZ*2/TRA<br>P//KAUZ*2/6/PVN//CAR422/ANA/5/BO<br>W/CROW//BUC/PVN/3/YR/4/TRAP#1 | CGSS05B00137T-<br>099TOPY-099M-099Y-<br>099ZTM-11WGY-0B                                                      | CIMMYT<br>MEXICO                     |
| 232   | BW48149    | FRET2*2/4/SNI/TRAP#1/3/KAUZ*2/TRA<br>P//KAUZ/5/PARUS/6/FRET2*2/KUKUN<br>A                              | CGSS05B00137T-<br>099TOPY-099M-099NJ-<br>099NJ-9WGY-0B                                                       | CIMMYT<br>MEXICO                     |
| 233   | BW48150    | FRET2*2/4/SNI/TRAP#1/3/KAUZ*2/TRA<br>P//KAUZ/5/PARUS/6/FRET2*2/KUKUN<br>A                              | CGSS05B00141T-<br>099TOPY-099M-099NJ-<br>099NJ-11WGY-0B                                                      | CIMMYT<br>MEXICO                     |
| 234   | BW48151    | FRET2*2/4/SNI/TRAP#1/3/KAUZ*2/TRA<br>P//KAUZ*2/5/KIRITATI                                              |                                                                                                              |                                      |

| Entry | Accessions | Pedigree                                                                                       | Source                                                  | Remarks          |
|-------|------------|------------------------------------------------------------------------------------------------|---------------------------------------------------------|------------------|
| 235   | BW48154    | FRET2/KUKUNA//FRET2/3/PASTOR//H<br>XL7573/2*BAU/5/FRET2*2/4/SNI/TRAP<br>#1/3/KAUZ*2/TRAP//KAUZ | CGSS05B00162T-<br>099TOPY-099M-099NJ-<br>13WGY-0B       | CIMMYT<br>MEXICO |
| 236   | BW48155    | WBLL1*2/KUKUNA*2//WHEAR                                                                        | CGSS05B00174T-<br>099TOPY-099M-099NJ-<br>099NJ-5WGY-0B  | CIMMYT<br>MEXICO |
| 237   | BW48156    | TRCH/SRTU//KACHU                                                                               | CGSS05B00189T-<br>099TOPY-099M-099NJ-<br>099NJ-7WGY-0B  | CIMMYT<br>MEXICO |
| 238   | BW48158    | SERI.1B//KAUZ/HEVO/3/AMAD*2/4/KI<br>RITATI                                                     | CGSS05B00198T-<br>099TOPY-099M-099NJ-<br>14WGY-0B       | CIMMYT<br>MEXICO |
| 239   | BW48172    | WAXWING*2/6/PVN//CAR422/ANA/5/B<br>OW/CROW//BUC/PVN/3/YR/4/TRAP#1                              | CGSS05B00220T-<br>099TOPY-099M-099NJ-<br>099NJ-2WGY-0B  | CIMMYT<br>MEXICO |
| 240   | BW48174    | PBW343*2/KUKUNA//PARUS/3/PBW34<br>3*2/KUKUNA                                                   | CGSS05B00256T-<br>099TOPY-099M-099NJ-<br>099NJ-3WGY-0B  | CIMMYT<br>MEXICO |
| 241   | BW48161    | PBW343*2/KUKUNA//PARUS/3/PBW34<br>3*2/KUKUNA                                                   | CGSS05B00256T-<br>099TOPY-099M-099NJ-<br>099NJ-5WGY-0B  | CIMMYT<br>MEXICO |
| 242   | BW48162    | PBW343*2/KUKUNA*2//YANAC                                                                       | CGSS05B00258T-<br>099TOPY-099M-099Y-<br>099ZTM-12WGY-0B | CIMMYT<br>MEXICO |
| 243   | BW48163    | PBW343*2/KUKUNA*2//YANAC                                                                       | CGSS05B00258T-<br>099TOPY-099M-099NJ-<br>1WGY-0B        | CIMMYT<br>MEXICO |
| 244   | BW48166    | PBW343*2/KUKUNA//SRTU/3/PBW343*<br>2/KHVAKI                                                    | CGSS05B00261T-<br>099TOPY-099M-099NJ-<br>099NJ-8WGY-0B  | CIMMYT<br>MEXICO |

| Entry | Accessions | Pedigree                                                                               | Source                                                 | Remarks       |
|-------|------------|----------------------------------------------------------------------------------------|--------------------------------------------------------|---------------|
| 245   | BW48165    | PBW343*2/KUKUNA//SRTU/3/PBW343*2/KHVAKI                                                | CGSS05B00261T-099TOPY-099M-099NJ-099NJ-6WGY-0B         | CIMMYT MEXICO |
| 246   | BW48169    | ATTILA*2/PBW65/6/PVN//CAR422/AN A/5/BOW/CROW//BUC/PVN/3/YR/4/TR AP#1/7/ATTILA/2*PASTOR | CGSS05B00290T-099TOPY-099M-099Y-099ZTM-20WGY-0B        | CIMMYT MEXICO |
| 247   | BW48168    | ATTILA*2/PBW65/6/PVN//CAR422/AN A/5/BOW/CROW//BUC/PVN/3/YR/4/TR AP#1/7/ATTILA/2*PASTOR | CGSS05B00290T-099TOPY-099M-099Y-099ZTM-17WGY-0B        | CIMMYT MEXICO |
| 248   | BW49069    | ATTILA*2/PBW65*2//KACHU                                                                | CMSS06Y00582T-099TOPM-099Y-099ZTM-099Y-099M-10WGY-0B   | CIMMYT MEXICO |
| 249   | BW49227    | ATTILA*2/PBW65*2//KACHU                                                                | CMSS06Y00582T-099TOPM-099Y-099ZTM-099Y-099M-13WGY-0B   | CIMMYT MEXICO |
| 250   | BW49235    | REEDLING #1                                                                            | CMSS06Y00605T-099TOPM-099Y-099ZTM-099Y-099M-11WGY-0B   | CIMMYT MEXICO |
| 251   | BW49072    | KACHU #1/KIRITATI//KACHU                                                               | CMSS06Y00778T-099TOPM-099Y-099ZTM-099NJ-099NJ-6WGY-0B  | CIMMYT MEXICO |
| 252   | BW49075    | PBW343*2/KUKUNA*2//FRTL/PIFED                                                          | CMSS06Y00831T-099TOPM-099Y-099ZTM-099NJ-099NJ-5WGY-0B  | CIMMYT MEXICO |
| 253   | BW49077    | WBLL1*2/4/BABAX/LR42//BABAX/3/B ABAX/LR42//BABAX                                       | CMSS06Y00885T-099TOPM-099Y-099ZTM-099NJ-099NJ-26WGY-0B | CIMMYT MEXICO |
| 254   | BW49078    | ATTILA*2/PBW65*2//MURGA                                                                | CMSS06Y00920T-099TOPM-099Y-099ZTM-099Y-099M-36WGY-0B   | CIMMYT MEXICO |

| Entry | Accessions | Pedigree                                                                    | Source                                                                        | Remarks          |
|-------|------------|-----------------------------------------------------------------------------|-------------------------------------------------------------------------------|------------------|
| 255   | BW49079    | ROLF07*2/5/REH/HARE//2*BCN/3/CRO<br>C_1/AE.SQUARROSA<br>(213)//PGO/4/HUITES | CMSS06Y00926T-<br>099TOPM-099Y-099ZTM-<br>099Y-099M-5WGY-0B<br>CMSS06Y01061T- | CIMMYT<br>MEXICO |
| 256   | BW49082    | ROLF07*2/5/FCT/3/GOV/AZ//MUS/4/DO<br>VE/BUC                                 | 099TOPM-099Y-099ZTM-<br>099Y-0FUS-7WGY-0B<br>CMSS06Y01171T-                   | CIMMYT<br>MEXICO |
| 257   | BW49344    | SAUAL/3/ACHTAR*3//KANZ/KS85-8-<br>4/4/SAUAL                                 | 099TOPM-099Y-099ZTM-<br>099Y-099M-8WGY-0B<br>CMSS06B00013S-0Y-                | CIMMYT<br>MEXICO |
| 258   | BW49084    | FRNCLN/ROLF07                                                               | 099ZTM-099Y-099M-<br>2WGY-0B<br>CMSS06B00109S-0Y-                             | CIMMYT<br>MEXICO |
| 259   | BW49088    | QUAIU/5/FRET2*2/4/SNI/TRAP#1/3/KA<br>UZ*2/TRAP//KAUZ<br>TACUPETO            | 099ZTM-099NJ-099NJ-<br>13WGY-0B<br>CMSS06B00142S-0Y-                          | CIMMYT<br>MEXICO |
| 260   | BW49089    | F2001*2/BRAMBLING//WBLL1*2/BRA<br>MBLING                                    | 099ZTM-099Y-099M-<br>30WGY-0B<br>CMSS06B00169S-0Y-                            | CIMMYT<br>MEXICO |
| 261   | BW49391    | BECARD/KACHU                                                                | 099ZTM-099Y-099M-<br>15WGY-0B<br>CMSS06B00169S-0Y-                            | CIMMYT<br>MEXICO |
| 262   | BW49092    | BECARD/KACHU                                                                | 099ZTM-099Y-099M-<br>21WGY-0B<br>CMSS06B00169S-0Y-                            | CIMMYT<br>MEXICO |
| 263   | BW49093    | BECARD/KACHU<br>ALTAR 84/AE.SQUARROSA                                       | 099ZTM-099Y-099M-<br>28WGY-0B<br>CMSS06B00201S-0Y-                            | CIMMYT<br>MEXICO |
| 264   | BW49399    | (221)//3*BORL95/3/URES/JUN//KAUZ/4/<br>WBLL1/5/MUTUS                        | 099ZTM-099Y-099M-<br>8WGY-0B                                                  | CIMMYT<br>MEXICO |

| Entry | Accessions | Pedigree                                                             | Source                                            | Remarks       |
|-------|------------|----------------------------------------------------------------------|---------------------------------------------------|---------------|
| 265   | BW49095    | TRCH/HUIRIVIS #1                                                     | CMSS06B00314S-0Y-099ZTM-099NJ-099NJ-21WGY-0B      | CIMMYT MEXICO |
| 266   | BW49097    | BECARD/AKURI                                                         | CMSS06B00411S-0Y-099ZTM-099Y-099M-12WGY-0B        | CIMMYT MEXICO |
| 268   | BW49102    | QUELEA                                                               | CMSS06B00640S-0Y-099ZTM-099Y-099M-7WGY-0B         | CIMMYT MEXICO |
| 269   | BW49108    | UP2338*2/VIVITSI/3/FRET2/TUKURU//FRET2/4/MISR 1                      | CMSS06B00848T-099TOPY-099ZTM-099NJ-099NJ-12WGY-0B | CIMMYT MEXICO |
| 270   | BW49109    | WAXBILL                                                              | CMSS06B00915T-099TOPY-099ZTM-099Y-099M-8WGY-0B    | CIMMYT MEXICO |
| 271   | BW49110    | BAV92//IRENA/KAUZ/3/HUITES/4/GONDO/TNMU/5/BAV92//IRENA/KAUZ/3/HUITES | CMSS06B00918T-099TOPY-099ZTM-099Y-0FUS-6WGY-0B    | CIMMYT MEXICO |
| 272   | BW49111    | WBLL1*2/TUKURU//FN/2*PASTOR/3/FRET2/KIRITATI                         | CMSS06B00926T-099TOPY-099ZTM-099Y-0FUS-18WGY-0B   | CIMMYT MEXICO |
| 273   | BW49112    | PVN/5/2*REH/HARE//2*BCN/3/CROC_1/AE.SQUARROSA (213)//PGO/4/HUITES    | CMSS06B00975T-099TOPY-099ZTM-099Y-099M-9WGY-0B    | CIMMYT MEXICO |
| 274   | BW49113    | KFA/2*KACHU                                                          | CMSS06B01005T-099TOPY-099ZTM-099NJ-099NJ-31WGY-0B | CIMMYT MEXICO |
| 275   | BW49922    | CHIBIA//PRLII/CM65531/3/MISR2, EGY/4/MUNAL #1                        | CMSS07Y00066S-0B-099Y-099M-099Y-38M-0WGY          | CIMMYT MEXICO |

| Entry | Accessions | Pedigree                                   | Source                                          | Remarks       |
|-------|------------|--------------------------------------------|-------------------------------------------------|---------------|
| 276   | BW49923    | KACHU//WBLL1*2/BRAMBLING                   | CMSS07Y00124S-0B-099Y-099M-099NJ-099NJ-9WGY-0B  | CIMMYT MEXICO |
| 277   | BW49924    | KACHU/KIRITATI                             | CMSS07Y00127S-0B-099Y-099M-099NJ-099NJ-6WGY-0B  | CIMMYT MEXICO |
| 278   | BW49927    | SUP152/BAJ #1                              | CMSS07Y00195S-0B-099Y-099M-099Y-16M-0WGY        | CIMMYT MEXICO |
| 279   | BW49929    | SUP152/BECARD                              | CMSS07Y00197S-0B-099Y-099M-099NJ-099NJ-21WGY-0B | CIMMYT MEXICO |
| 280   | BW49931    | WBLL4/KUKUNA//WBLL1/3/WBLL1*2/BRAMBLING    | CMSS07Y00348S-0B-099Y-099M-099Y-19M-0WGY        | CIMMYT MEXICO |
| 281   | BW49932    | ITP40/AKURI                                | CMSS07Y00441S-0B-099Y-099M-099NJ-099NJ-4WGY-0B  | CIMMYT MEXICO |
| 282   | BW49933    | KIRITATI/WBLL1//MESIA/3/KIRITATI/WBLL1     | CMSS07Y00847T-099TOPM-099Y-099M-099Y-53M-0WGY   | CIMMYT MEXICO |
| 283   | BW49934    | KIRITATI/WBLL1//2*BLOUK #1                 | CMSS07Y00849T-099TOPM-099Y-099M-099Y-17M-0WGY   | CIMMYT MEXICO |
| 284   | BW49936    | SUP152/AKURI//SUP152                       | CMSS07Y00965T-099TOPM-099Y-099M-099Y-23M-0WGY   | CIMMYT MEXICO |
| 285   | BW49939    | MUTUS*2/AKURI                              | CMSS07Y01083T-099TOPM-099Y-099M-099Y-40M-0WGY   | CIMMYT MEXICO |
| 286   | BW49943    | PBW343*2/KUKUNA/3/PASTOR//CHIL/PRL/4/GRACK | CMSS07B00129S-099M-099Y-099M-5WGY-0B            | CIMMYT MEXICO |

| Entry | Accessions | Pedigree                                                                                                                                                                   | Source                                                                                        | Remarks                              |
|-------|------------|----------------------------------------------------------------------------------------------------------------------------------------------------------------------------|-----------------------------------------------------------------------------------------------|--------------------------------------|
| 287   | BW49948    | BECARD/FRNCLN                                                                                                                                                              | CMSS07B00235S-099M-099Y-099M-25WGY-0B                                                         | CIMMYT<br>MEXICO                     |
| 288   | BW49949    | WBLL1*2/BRAMBLING//CHYAK                                                                                                                                                   | CMSS07B00374S-099M-099NJ-099NJ-8WGY-0B                                                        | CIMMYT<br>MEXICO                     |
| 289   | BW49950    | BECARD//ND643/2*WBLL1                                                                                                                                                      | CMSS07B00377S-099M-099NJ-099NJ-23WGY-0B                                                       | CIMMYT<br>MEXICO                     |
| 290   | BW49953    | KAUZ*2/MNV//KAUZ/3/MILAN/4/BAV<br>92/5/AKURI/6/MUTUS                                                                                                                       | CMSS07B00577T-099TOPY-099M-099Y-099M-2WGY-0B                                                  | CIMMYT<br>MEXICO                     |
| 291   | BW49954    | KACHU/BECARD//WBLL1*2/BRAMBLI<br>NG                                                                                                                                        | CMSS07B00580T-099TOPY-099M-099Y-099M-10WGY-0B                                                 | CIMMYT<br>MEXICO                     |
| 292   | BW49955    | KAUZ/PASTOR//PBW343/3/KIRITATI/4/<br>FRNCLN                                                                                                                                | CMSS07B00585T-099TOPY-099M-099Y-099M-11WGY-0B                                                 | CIMMYT<br>MEXICO                     |
| 293   | BW49956    | SUP152*2/TECUE #1                                                                                                                                                          | CMSS07B00614T-099TOPY-099M-099Y-099M-49WGY-0B                                                 | CIMMYT<br>MEXICO                     |
| 294   | BW49957    | FRANCOLIN #1/AKURI #1//FRNCLN                                                                                                                                              | CMSS07B00655T-099TOPY-099M-099Y-099M-11WGY-0B                                                 | CIMMYT<br>MEXICO                     |
| 295   | BW49958    | ND643/2*TRCH//MUTUS/3/SUP152                                                                                                                                               | CMSS07B00825T-099TOPY-099M-099Y-099M-11WGY-0B                                                 | CIMMYT<br>MEXICO                     |
| 296   | BW48314    | WBLL1*2/4/YACO/PBW65/3/KAUZ*2/T<br>RAP//KAUZ/5/KACHU #1<br>ALTAR 84/AE.SQUARROSA<br>(221)//3*BORL95/3/URES/JUN//KAUZ/4/<br>WBLL1/5/REH/HARE//2*BCN/3/CROC_<br>1/AE.SQUARRO | CMSS05B00061S-099Y-099M-099Y-099ZTM-3WGY-0B<br>CMSS06Y00117S-0B-099Y-099ZTM-099Y-099M-7WGY-0B | CIMMYT<br>MEXICO<br>CIMMYT<br>MEXICO |
| 297   | BW49217    |                                                                                                                                                                            |                                                                                               |                                      |



| Entry | Accessions | Pedigree                                                                            | Source                                                                         | Remarks          |
|-------|------------|-------------------------------------------------------------------------------------|--------------------------------------------------------------------------------|------------------|
| 298   | BW49307    | WBLL1*2/KURUKU*2/5/REH/HARE//2*<br>BCN/3/CROC_1/AE.SQUARROSA<br>(213)//PGO/4/HUITES | CMSS06Y00933T-<br>099TOPM-099Y-099ZTM-<br>099Y-099M-30WGY-0B<br>CMSS06Y01026T- | CIMMYT<br>MEXICO |
| 299   | BW49325    | ATTILA*2/PBW65*2/4/BOW/NKT//CBR<br>D/3/CBRD                                         | 099TOPM-099Y-099ZTM-<br>099Y-099M-1WGY-0B<br>CMSS06Y01026T-                    | CIMMYT<br>MEXICO |
| 300   | BW49326    | ATTILA*2/PBW65*2/4/BOW/NKT//CBR<br>D/3/CBRD                                         | 099TOPM-099Y-099ZTM-<br>099Y-099M-6WGY-0B<br>CMSS06Y01026T-                    | CIMMYT<br>MEXICO |
| 301   | BW49327    | ATTILA*2/PBW65*2/4/BOW/NKT//CBR<br>D/3/CBRD                                         | 099TOPM-099Y-099ZTM-<br>099Y-099M-9WGY-0B<br>CMSS06Y01026T-                    | CIMMYT<br>MEXICO |
| 302   | BW49328    | ATTILA*2/PBW65*2/4/BOW/NKT//CBR<br>D/3/CBRD                                         | 099TOPM-099Y-099ZTM-<br>099Y-099M-11WGY-0B<br>CMSS06Y01026T-                   | CIMMYT<br>MEXICO |
| 303   | BW49329    | ATTILA*2/PBW65*2/4/BOW/NKT//CBR<br>D/3/CBRD                                         | 099TOPM-099Y-099ZTM-<br>099Y-099M-18WGY-0B<br>CMSS06Y01026T-                   | CIMMYT<br>MEXICO |
| 304   | BW49330    | ATTILA*2/PBW65*2/4/BOW/NKT//CBR<br>D/3/CBRD                                         | 099TOPM-099Y-099ZTM-<br>099Y-099M-23WGY-0B<br>CMSS06Y01026T-                   | CIMMYT<br>MEXICO |
| 305   | BW49331    | ATTILA*2/PBW65*2/4/BOW/NKT//CBR<br>D/3/CBRD                                         | 099TOPM-099Y-099ZTM-<br>099Y-099M-28WGY-0B<br>CMSS06Y01040T-                   | CIMMYT<br>MEXICO |
| 306   | BW49333    | BAV92//IRENA/KAUZ/3/HUITES*2/4/G<br>ONDO/TNMU                                       | 099TOPM-099Y-099ZTM-<br>099Y-0FUS-28WGY-0B<br>CMSS06Y01115T-                   | CIMMYT<br>MEXICO |
| 307   | BW49342    | KACHU*2//CHIL/CHUM18                                                                | 099TOPM-099Y-099ZTM-<br>099Y-0FUS-4WGY-0B                                      | CIMMYT<br>MEXICO |

| Entry | Accessions  | Pedigree                                                                      | Source                                                      | Remarks          |
|-------|-------------|-------------------------------------------------------------------------------|-------------------------------------------------------------|------------------|
| 308   | BW49351     | KACHU #1*2/WHEAR                                                              | CMSS06Y01282T-<br>099TOPM-099Y-099ZTM-<br>099Y-099M-3WGY-0B | CIMMYT<br>MEXICO |
| 309   | BW49385     | FRANCOLIN<br>#1//WBLL1*2/BRAMBLING                                            | CMSS06B00154S-0Y-<br>099ZTM-099Y-099M-<br>2WGY-0B           | CIMMYT<br>MEXICO |
| 310   | BW49392     | BECARD/KACHU                                                                  | CMSS06B00169S-0Y-<br>099ZTM-099Y-099M-<br>25WGY-0B          | CIMMYT<br>MEXICO |
| 311   | BW49394     | BECARD/KACHU                                                                  | CMSS06B00169S-0Y-<br>099ZTM-099Y-099M-<br>23WGY-0B          | CIMMYT<br>MEXICO |
| 312   | BW49094     | ALTAR 84/AE.SQUARROSA<br>(221)//3*BORL95/3/URES/JUN//KAUZ/4/<br>WBLL1/5/MUTUS | CMSS06B00201S-0Y-<br>099ZTM-099Y-099M-<br>14WGY-0B          | CIMMYT<br>MEXICO |
| 313   | BW49400     | ALTAR 84/AE.SQUARROSA<br>(221)//3*BORL95/3/URES/JUN//KAUZ/4/<br>WBLL1/5/MUTUS | CMSS06B00201S-0Y-<br>099ZTM-099Y-099M-<br>15WGY-0B          | CIMMYT<br>MEXICO |
| 314   | BW49099     | KINGBIRD #1//INQALAB<br>91*2/TUKURU                                           | CMSS06B00485S-0Y-<br>099ZTM-099Y-099M-<br>7WGY-0B           | CIMMYT<br>MEXICO |
| 315   | BW49448     | ATTILA*2/PBW65*2//TOBA97/PASTOR                                               | CMSS06B00676T-<br>099TOPY-099ZTM-099Y-<br>099M-2WGY-0B      | CIMMYT<br>MEXICO |
| 316   | BW49456     | WBLL1*2/VIVITSI//PRINIA/PASTOR/3/<br>WBLL1*2/BRAMBLING                        | CMSS06B00726T-<br>099TOPY-099ZTM-099Y-<br>099M-6WGY-0B      | CIMMYT<br>MEXICO |
| 317   | BW49458     | NAC/TH.AC//3*PVN/3/MIRLO/BUC/4/2*<br>PASTOR/5/KACHU/6/KACHU                   | CMSS06B00734T-<br>099TOPY-099ZTM-099Y-<br>099M-13WGY-0B     | CIMMYT<br>MEXICO |
| 318   | Pasteur     | Pasteur                                                                       | Pasteur                                                     | Check            |
| 319   | AC Carberry | AC Carberry                                                                   | AC Carberry                                                 | Check            |

| Entry | Accessions | Pedigree | Source  | Remarks |
|-------|------------|----------|---------|---------|
| 320   | Norwell    | Norwell  | Norwell | Check   |
