# Supplementary material
Source: MDPI journal article supplement (https://www.mdpi.com/2073-4395/11/3/486)
Supplement: s1 [file s1]

Archive with 6 entries (6 files):
- Supplementary material Table S1.pdf
- Supplementary material Table S2.pdf
- Supplementary material Table S3.pdf
- Supplementary material Table S4.pdf
- Supplementary material Table S5.pdf
- Supplementary material Table S6.pdf
